# Supplementary material for: Catalytic enantioselective trifluoromethylthiolation of oxindoles using shelf-stable N-(trifluoromethylthio)phthalimide and a cinchona alkaloid catalyst
Source: Royal Society of Chemistry journal article supplement (doi:10.1039/c3cc49877h), 2014-01-01
Supplement: c3cc49877h.pdf [file c3cc49877h.pdf]

## Supporting Information

### Catalytic Enantioselective Trifluoromethylthiolation of Oxindoles using Shelf-Stable N-(Trifluoromethylthio)phthalimide and a Cinchona Alkaloid Catalyst

Magnus Rueping,<sup>\*a</sup> Xiangqian Liu,<sup>a</sup> Teerawut Bootwicha,<sup>a</sup> Roman Pluta<sup>a</sup> and Carina Merkens<sup>b</sup>

<sup>a</sup>*RWTH Aachen University, Institute of Organic Chemistry, Landoltweg 1, D-52074 Aachen, Germany*

<sup>b</sup>*RWTH Aachen University, Institute of Inorganic Chemistry, Landoltweg 1, D-52074 Aachen, Germany*

magnus.rueping@rwth-aachen.de

#### Table of Contents

|                                                                         |     |
|-------------------------------------------------------------------------|-----|
| General Methods                                                         | S2  |
| General procedure for the enantioselective trifluoromethylsulfenylation | S3  |
| Characterization of the products                                        | S4  |
| X-Ray Crystallographic Analysis of <b>6k</b>                            | S12 |
| References                                                              | S14 |
| NMR spectra and HPLC chromatograms                                      | S15 |

**General Methods.** Unless otherwise noted, all commercially available compounds were used as provided without further purification. Solvents for chromatography were technical grade and distilled prior to use. Dry dichloromethane, chloroform and chlorobenzene used in reactions were obtained by distilling over calcium hydride and were stored over activated molecular sieves (4 Å). Diethyl ether, toluene and *o*-xylene used in reactions were obtained by distilling over sodium-benzophenone ketyl. Analytical thin-layer chromatography (TLC) was performed on Macherey-Nagel silica gel 60 aluminium plates with F-254 indicator, visualised by UV irradiation. Column chromatography was performed using MN silica gel (particle size 0.040-0.063 mm). <sup>1</sup>H-NMR, <sup>13</sup>C-NMR, and <sup>19</sup>F-NMR spectra were recorded on a vnmrs-400 or vnmrs-600 spectrometer in CDCl<sub>3</sub> with residual proton signal of the deuterated solvents as the internal reference ( $\delta$ H = 7.26 ppm and  $\delta$ C = 77 ppm for CDCl<sub>3</sub> or  $\delta$ H = 0.00 ppm for TMS). Data are reported in the following order: chemical shift ( $\delta$ ) in ppm; multiplicities are indicated s (singlet), d (doublet), t (triplet), q (quartet), m (multiplet), dd (doublet of doublet), tt (triplet of triplet), dt (doublet of triplet), td (triplet of doublet); coupling constants (*J*) are in Hertz (Hz). IR spectra were recorded on a Jasco FT/IR-420 spectrometer and are reported in terms of frequency of absorption (cm<sup>-1</sup>). (MS-EI, 70 eV) were conducted on Finnigan SSQ 7000 mass spectrometer. (MS-ESI) were conducted on ThermoFinnigan LCQ Deca XP plus. Melting points were recorded on a Büchi 560 Melting Point Apparatus. Optical rotations were measured on a Perkin Elmer 241 polarimeter. The enantiomeric excesses were determined by Supercritical Fluid Chromatography (SFC) analysis and HPLC analysis using a chiral stationary phase column (column, Daicel Co. Chiralpak IA or (S,S)-Whelk-01 columns. The chiral SFC methods and HPLC methods were calibrated with the corresponding racemic mixtures. Chemical yields refer to pure isolated substances. The yields and enantiomeric excesses are given in the corresponding tables.

The oxindoles **5a**,<sup>1</sup> **5b-I**,<sup>2</sup> and **5m-r**<sup>3</sup> were synthesized according to the literature procedures.

### General procedure for enantioselective trifluoromethanesulfonylation:

In a screwcapped reaction tube, a mixture of oxindole **5a** (0.1 mmol, 1.0 equiv) and (DHQD)<sub>2</sub>Pyr (10 mol%) was dissolved in toluene (0.5 mL) and *N*-(trifluoromethylthio)phthalimide **1** (0.12 mmol, 1.2 equiv) was added at -10°C. The resulting solution was stirred at -10°C until being completed (TLC monitoring). The crude reaction mixture was directly charged on silica gel and purified by column chromatography (SiO<sub>2</sub>, *n*-hexane/Et<sub>2</sub>O, 94:6) to afford the desired product **6a**.

**Figure 1.** Structure of the catalysts evaluated in this study.

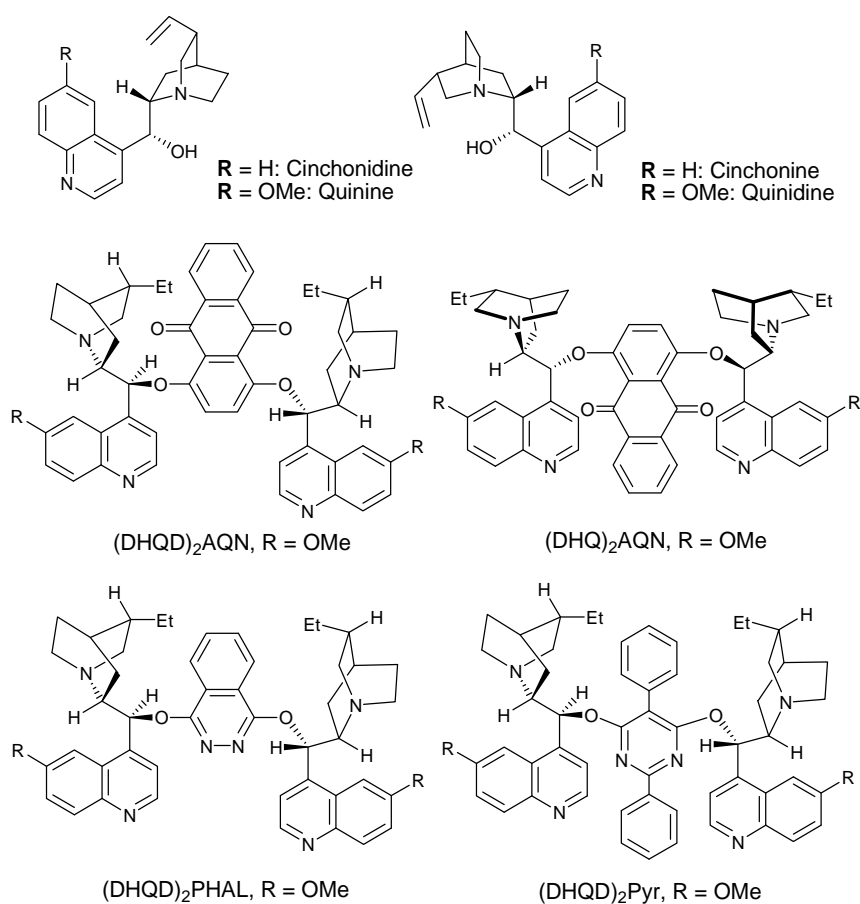

**(S)-tert-Butyl 3-phenyl-3-(trifluoromethanesulfonyl)-2-oxindoline-1-carboxylate**

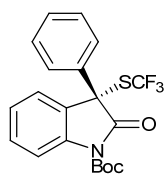

Isolated as a colorless oil,  $[\alpha]_D^{25} = +66.5$  ( $c=1.62$  in  $\text{CHCl}_3$ );  $^1\text{H}$  NMR (600 MHz,  $\text{CDCl}_3$ ):  $\delta = 7.97$  (d,  $J = 8.3$  Hz, 1H), 7.57 (dd,  $J = 7.6, 1.0$  Hz, 1H), 7.55–7.49 (m, 2H), 7.46 (td,  $J = 7.9, 1.4$  Hz, 1H), 7.40–7.30 (m, 4H), 1.62 (s, 9H);  $^{13}\text{C}$  NMR (151 MHz,  $\text{CDCl}_3$ ):  $\delta = 172.3, 148.9, 139.2, 134.0, 130.4, 129.4, 129.1, 128.5$  (q,  $J = 310.8$  Hz,  $\text{SCF}_3$ ), 127.7, 126.9, 126.0, 124.8, 115.7, 85.0, 59.5, 28.0;  $^{19}\text{F}$  NMR (564 MHz,  $\text{CDCl}_3$ ):  $\delta = -38.8$  (s,  $\text{SCF}_3$ ); IR (ATR):  $\tilde{\nu} = 2984, 2935, 2429, 2262, 1778, 1604, 1474, 1340, 1294, 1253, 1117, 1029, 934, 840, 756, 697, 605, 541, 468$   $\text{cm}^{-1}$ ; MS (ESI):  $m/z$  (%) = 432 ( $[\text{M}+\text{Na}]^+$ , 3), 327 (10), 313 (15), 180 (46), 166 (34), 148 (23); The enantiomeric excess was determined by chiral SFC using a (S,S) Whelk-01 column, 2% MeOH/ $\text{CO}_2$ , 4 mL  $\text{min}^{-1}$ , 231 nm; major enantiomer:  $t_R = 5.22$  min, minor enantiomer:  $t_R = 7.20$  min (92% ee).

**(S)-tert-Butyl 3-p-tolyl-3-(trifluoromethanesulfonyl)-2-oxindoline-1-carboxylate**

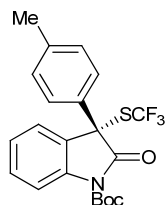

Isolated as a colorless oil,  $[\alpha]_D^{25} = +55.3$  ( $c=1.70$  in  $\text{CHCl}_3$ );  $^1\text{H}$  NMR (400 MHz,  $\text{CDCl}_3$ ):  $\delta = 7.96$  (d,  $J = 8.2$  Hz, 1H), 7.56 (dd,  $J = 7.6, 1.0$  Hz, 1H), 7.48–7.42 (m, 1H), 7.42–7.35 (m, 2H), 7.32 (td,  $J = 7.6, 1.0$  Hz, 1H), 7.16 (d,  $J = 8.1$  Hz, 2H), 2.32 (s, 3H), 1.61 (s, 9H);  $^{13}\text{C}$  NMR (101 MHz,  $\text{CDCl}_3$ ):  $\delta = 172.4, 148.9, 139.6, 139.2, 131.0, 130.3, 129.8, 128.5$  (q,  $J = 310.9$  Hz,  $\text{SCF}_3$ ), 127.6, 126.9, 126.2, 124.7, 115.6, 85.0, 59.3, 28.0, 21.0;  $^{19}\text{F}$  NMR (376 MHz,  $\text{CDCl}_3$ ):  $\delta = -38.9$  (s,  $\text{SCF}_3$ ); IR (ATR):  $\tilde{\nu} = 2982, 2323, 2098, 1774, 1738, 1605, 1469, 1339, 1289, 1249, 1111, 1026, 837, 749$   $\text{cm}^{-1}$ ; MS (EI)  $m/z$  (%) = 423 ( $[\text{M}]^+$ , 4), 323 (13), 322 (17), 223 (17), 222 (100), 57 (27); HPLC conditions: IA column,  $n$ -hexane/2-propanol = 99/1, flow rate = 1.0 mL  $\text{min}^{-1}$ , minor enantiomer:  $t_R = 6.10$  min; major enantiomer:  $t_R = 9.80$  min (95% ee).

**(S)-tert-Butyl 3-(4-tert-butylphenyl)-3-(trifluoromethanesulfonyl)-2-oxindoline-1-carboxylate**

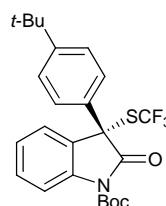

Isolated as a colorless oil,  $[\alpha]_D^{25} = +43.4$  ( $c=2.02$  in  $\text{CHCl}_3$ );  $^1\text{H}$  NMR (600 MHz,  $\text{CDCl}_3$ ):  $\delta = 7.95$  (d,  $J = 8.2$  Hz, 1H), 7.57 (dd,  $J = 7.6, 1.1$  Hz, 1H), 7.47–7.41 (m, 3H), 7.39–7.35 (m, 2H), 7.32 (td,  $J = 7.6, 1.0$  Hz, 1H), 1.61 (s,

9H), 1.28 (s, 9H);  $^{13}\text{C}$  NMR (151 MHz,  $\text{CDCl}_3$ ):  $\delta = 172.5, 152.6, 148.9, 139.2, 130.9, 130.3, 128.6$  (q,  $J = 311.0$  Hz,  $\text{SCF}_3$ ), 127.4, 126.9, 126.2, 126.1, 124.7, 115.6, 85.0, 59.3, 34.6, 31.1, 28.0;  $^{19}\text{F}$  NMR (564 MHz,  $\text{CDCl}_3$ ):  $\delta = -38.9$  (s,  $\text{SCF}_3$ ); IR (ATR):  $\tilde{\nu} = 2970, 2318, 1772, 1736, 1606, 1471, 1342, 1289, 1251, 1114, 1022, 938, 830, 750, 679$   $\text{cm}^{-1}$ ; MS (ESI):  $m/z$  (%) = 488 ( $[\text{M}+\text{Na}]^+$ , 94), 483 (23), 411 (13), 410 (62), 388 (24), 366 (29), 264 (45), 191 (11); The enantiomeric excess was determined by chiral SFC using a (S,S) Whelk-01 column, 2% MeOH/ $\text{CO}_2$ , 4  $\text{mL min}^{-1}$ , 231 nm; major enantiomer:  $t_R = 4.73$  min, minor enantiomer:  $t_R = 9.58$  min (94% ee).

### (S)-tert-Butyl 3-(4-butylphenyl)-3-(trifluoromethanesulfonyl)-2-oxoindoline-1-Carboxylate

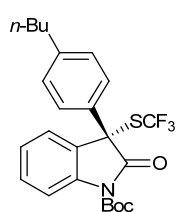

Isolated as a colorless oil,  $[\alpha]_{\text{D}}^{25} = +45.6$  ( $c=1.77$  in  $\text{CHCl}_3$ );  $^1\text{H}$  NMR (600 MHz,  $\text{CDCl}_3$ ):  $\delta = 7.96$  (d,  $J = 8.3$  Hz, 1H), 7.57 (dd,  $J = 7.6, 1.1$  Hz, 1H), 7.45 (ddd,  $J = 8.3, 7.7, 1.4$  Hz, 1H), 7.42–7.39 (m, 2H), 7.32 (td,  $J = 7.6, 1.0$  Hz, 1H), 7.18–7.14 (m, 2H), 2.60–2.55 (m, 2H), 1.62 (s, 9H), 1.59–1.53 (m, 2H), 1.37–1.29 (m, 2H), 0.91 (dd,  $J = 8.5, 6.3$  Hz, 3H);  $^{13}\text{C}$  NMR (151 MHz,  $\text{CDCl}_3$ ):  $\delta = 172.5, 148.9, 144.5, 139.2, 131.1, 130.3, 129.2, 128.6$  (q,  $J = 311.0$  Hz,  $\text{SCF}_3$ ), 127.6, 126.9, 126.2, 124.7, 115.6, 85.0, 59.4, 35.2, 33.3, 28.0, 22.3, 13.9;  $^{19}\text{F}$  NMR (564 MHz,  $\text{CDCl}_3$ ):  $\delta = -38.9$  (s,  $\text{SCF}_3$ ); IR (ATR):  $\tilde{\nu} = 2938, 2866, 2170, 1768, 1734, 1602, 1467, 1372, 1332, 1284, 1250, 1103, 1022, 868, 829, 753, 673$   $\text{cm}^{-1}$ ; MS (ESI):  $m/z$  (%) = 488 ( $[\text{M}+\text{Na}]^+$ , 20), 410 (15), 366 (4), 181 (12), 180 (92), 166 (14), 148 (29), 134 (11); The enantiomeric excess was determined by chiral SFC using a (S,S) Whelk-01 column, 2% MeOH/ $\text{CO}_2$ , 4  $\text{mL min}^{-1}$ , 231 nm; major enantiomer:  $t_R = 6.04$  min, minor enantiomer:  $t_R = 11.39$  min (94% ee).

### (S)-tert-Butyl 3-(biphenyl-4-yl)-3-(trifluoromethanesulfonyl)-2-oxoindoline-1-carboxylate

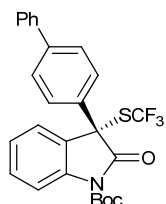

Isolated as a colorless oil,  $[\alpha]_{\text{D}}^{25} = +43.1$  ( $c=1.93$  in  $\text{CHCl}_3$ );  $^1\text{H}$  NMR (600 MHz,  $\text{CDCl}_3$ ):  $\delta = 7.99$  (d,  $J = 8.4$  Hz, 1H), 7.61 (dd,  $J = 7.7, 1.1$  Hz, 1H), 7.60–7.56 (m, 4H), 7.56–7.53 (m, 2H), 7.48 (ddd,  $J = 8.2, 7.7, 1.4$  Hz, 1H),

7.46–7.42 (m, 2H), 7.39–7.33 (m, 2H), 1.63 (s, 9H);  $^{13}\text{C}$  NMR (151 MHz,  $\text{CDCl}_3$ ):  $\delta$  172.3, 148.9, 142.3, 139.9, 139.3, 132.8, 130.4, 128.9, 128.5 (q,  $J = 310.9$  Hz,  $\text{SCF}_3$ ), 128.1, 127.8, 127.8, 127.1, 126.9, 126.0, 124.9, 115.7, 85.1, 59.4, 28.0;  $^{19}\text{F}$  NMR (564 MHz,  $\text{CDCl}_3$ ):  $\delta = -38.8$  (s,  $\text{SCF}_3$ ); IR (ATR):  $\tilde{\nu} = 2983, 2288, 2062, 1970, 1775, 1737, 1604, 1474, 1339, 1289, 1250, 1108, 1017, 906, 832, 747, 697$   $\text{cm}^{-1}$ ; MS (ESI):  $m/z$  (%) = 508 ( $[\text{M}+\text{Na}]^+$ , 55), 430 (22), 408 (13), 386 (6), 284 (20), 191 (16); The enantiomeric excess was determined by chiral SFC using a (S,S) Whelk-01 column, 5% MeOH/ $\text{CO}_2$ , 4  $\text{mL min}^{-1}$ , 231 nm; major enantiomer:  $t_R = 8.14$  min, minor enantiomer:  $t_R = 16.08$  min (91% ee).

### (S)-*tert*-Butyl 3-(4-ethoxyphenyl)-3-(trifluoromethanesulfonyl)-2-oxoindoline-1

#### -carboxylate

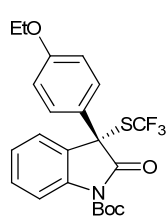

Isolated as a colorless oil,  $[\alpha]_{\text{D}}^{25} = +39.8$  ( $c=1.48$  in  $\text{CHCl}_3$ );  $^1\text{H}$  NMR (600 MHz,  $\text{CDCl}_3$ ):  $\delta$  7.95 = (d,  $J = 8.2$  Hz, 1H), 7.57 (dd,  $J = 7.6, 1.1$  Hz, 1H), 7.47–7.41 (m, 3H), 7.32 (td,  $J = 7.6, 1.0$  Hz, 1H), 6.88–6.83 (m, 2H), 4.00 (q,  $J = 7.0$  Hz, 2H), 1.61 (s, 9H), 1.39 (t,  $J = 7.0$  Hz, 3H);  $^{13}\text{C}$  NMR (151 MHz,  $\text{CDCl}_3$ ):  $\delta = 172.6, 159.7, 149.0, 139.2, 130.3, 129.1, 128.5$  (q,  $J = 311.3$  Hz,  $\text{SCF}_3$ ), 126.9, 126.2, 125.2, 124.7, 115.7, 114.9, 85.0, 63.6, 59.0, 28.0, 14.7;  $^{19}\text{F}$  NMR (564 MHz,  $\text{CDCl}_3$ ):  $\delta = -39.1$  (s,  $\text{SCF}_3$ ); IR (ATR):  $\tilde{\nu} = 2983, 2263, 1775, 1738, 1605, 1472, 1340, 1292, 1250, 1107, 1040, 920, 828, 750$   $\text{cm}^{-1}$ ; MS (ESI):  $m/z$  (%) = 476 ( $[\text{M}+\text{Na}]^+$ , 16), 398 (4), 181 (11), 180 (89), 166 (27), 148 (35); The enantiomeric excess was determined by chiral SFC using a (S,S) Whelk-01 column, 5% MeOH/ $\text{CO}_2$ , 4  $\text{mL min}^{-1}$ , 231 nm; major enantiomer:  $t_R = 4.76$  min, minor enantiomer:  $t_R = 9.00$  min (94% ee).

### (S)-*tert*-Butyl 3-(4-fluorophenyl)-3-(trifluoromethanesulfonyl)-2-oxoindoline-1

#### -carboxylate

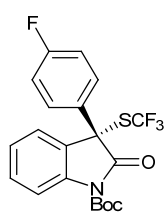

Isolated as a colorless oil,  $[\alpha]_{\text{D}}^{25} = +80.5$  ( $c=1.53$  in  $\text{CHCl}_3$ );  $^1\text{H}$  NMR (600 MHz,  $\text{CDCl}_3$ ):  $\delta = 7.97$  (d,  $J = 8.2$  Hz, 1H), 7.56 (dd,  $J = 7.6, 1.0$  Hz, 1H), 7.54–7.50 (m, 2H), 7.47 (ddd,  $J = 8.2, 7.7, 1.4$  Hz, 1H), 7.34 (td,  $J = 7.6, 1.0$  Hz, 1H), 7.08–7.02 (m, 2H), 1.62 (s, 9H);  $^{13}\text{C}$  NMR (151 MHz,  $\text{CDCl}_3$ ):  $\delta =$

172.2, 163.2 (d,  $J = 250.7$  Hz), 148.8, 139.2, 130.6, 129.9 (d,  $J = 8.5$  Hz), 129.7 (d,  $J = 2.7$  Hz), 128.4 (q,  $J = 311.1$  Hz, SCF<sub>3</sub>), 126.8, 125.8, 124.9, 116.1 (d,  $J = 21.9$  Hz), 115.8, 85.2, 58.8, 28.0; <sup>19</sup>F NMR (564 MHz, CDCl<sub>3</sub>):  $\delta = -38.9$  (s, SCF<sub>3</sub>),  $-111.5$ – $111.6$  (m, F); IR (ATR):  $\tilde{\nu} = 2984, 2292, 1739, 1603, 1470, 1339, 1290, 1244, 1106, 1020, 936, 826, 752$  cm<sup>-1</sup>; MS (ESI):  $m/z$  (%) = 450 ([M+Na]<sup>+</sup>, 31), 348 (3), 181 (13), 180 (100), 166 (16), 148 (35); The enantiomeric excess was determined by chiral SFC using a (S,S) Whelk-01 column, 2% MeOH/CO<sub>2</sub>, 4 mL min<sup>-1</sup>, 231 nm; major enantiomer:  $t_R = 3.44$  min, minor enantiomer:  $t_R = 5.55$  min (92% ee).

### (S)-*tert*-Butyl 3-(4-chlorophenyl)-3-(trifluoromethanesulfonyl)-2-oxoindoline-1

#### -carboxylate

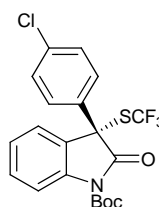

Isolated as a colorless oil,  $[\alpha]_D^{25} = +70.7$  ( $c=1.57$  in CHCl<sub>3</sub>); <sup>1</sup>H NMR (600 MHz, CDCl<sub>3</sub>):  $\delta = 7.97$  (d,  $J = 8.2$  Hz, 1H), 7.54 (dd,  $J = 7.6, 1.1$  Hz, 1H), 7.50–7.44 (m, 3H), 7.36–7.30 (m, 3H), 1.62 (s, 9H); <sup>13</sup>C NMR (151 MHz, CDCl<sub>3</sub>):  $\delta = 172.0, 148.8, 139.2, 135.8, 132.5, 130.6, 129.3, 129.2, 128.4$  (q,  $J = 311.2$  Hz, SCF<sub>3</sub>), 126.8, 125.6, 125.0, 115.8, 85.3, 58.9, 28.0; <sup>19</sup>F NMR (564 MHz, CDCl<sub>3</sub>):  $\delta = -38.8$  (s, SCF<sub>3</sub>); IR (ATR):  $\tilde{\nu} = 2983, 2171, 1773, 1739, 1603, 1476, 1339, 1290, 1250, 1103, 1016, 825, 752$  cm<sup>-1</sup>; MS (ESI):  $m/z$  (%) = 468 ([M+Na]<sup>+</sup>+2, 35), 466 ([M+Na]<sup>+</sup>, 100), 390 (25), 388 (64), 368 (9), 366 (27), 344 (10), 244 (10), 242 (33), 208 (14), 191 (16); The enantiomeric excess was determined by chiral SFC using a (S,S) Whelk-01 column, 2% MeOH/CO<sub>2</sub>, 4 mL min<sup>-1</sup>, 231 nm; major enantiomer:  $t_R = 5.17$  min, minor enantiomer:  $t_R = 9.28$  min (84% ee).

### (S)-*tert*-Butyl 3-*m*-tolyl-3-(trifluoromethanesulfonyl)-2-oxoindoline-1-carboxylate

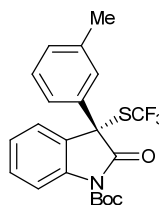

Isolated as a white solid, mp: 93–95 °C,  $[\alpha]_D^{25} = +63.7$  ( $c=1.68$  in CHCl<sub>3</sub>); <sup>1</sup>H NMR (400 MHz, CDCl<sub>3</sub>):  $\delta = 7.96$  (d,  $J = 8.2$  Hz, 1H), 7.55 (dd,  $J = 7.6, 1.1$  Hz, 1H), 7.48–7.42 (m, 1H), 7.36–7.29 (m, 2H), 7.24 (dt,  $J = 10.7, 6.4$  Hz, 2H), 7.18–7.14 (m, 1H), 2.33 (s, 3H), 1.62 (s, 9H); <sup>13</sup>C NMR (101 MHz, CDCl<sub>3</sub>):  $\delta = 172.4, 148.9, 139.2, 139.1, 134.0, 130.3, 130.2, 128.9, 128.6$  (q,  $J = 311.0$  Hz, SCF<sub>3</sub>), 128.2, 126.9, 126.2, 124.8, 124.7, 115.6, 85.0, 59.5, 28.0, 21.5; <sup>19</sup>F NMR (376 MHz, CDCl<sub>3</sub>):  $\delta = -38.9$  (s, SCF<sub>3</sub>);

IR (ATR):  $\tilde{\nu}$  = 2982, 2931, 2326, 2092, 1776, 1738, 1602, 1471, 1338, 1289, 1250, 1111, 1033, 841, 748, 693  $\text{cm}^{-1}$ ; MS (ESI):  $m/z$  (%) = 446 ( $[\text{M}+\text{Na}]^+$ , 25), 369 (14), 368 (72), 346 (13), 324 (26), 222 (50); HPLC conditions: IA column, *n*-hexane/2-propanol = 99/1, flow rate = 1.0  $\text{mL min}^{-1}$ , minor enantiomer:  $t_R$  = 5.99 min; major enantiomer:  $t_R$  = 8.77 min (92% ee).

### (*S*)-*tert*-Butyl 3-(3-methoxyphenyl)-3-(trifluoromethanesulfonyl)-2-oxoindoline-1

#### -carboxylate

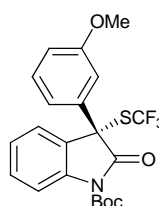

Isolated as a white solid, mp: 71–73 °C,  $[\alpha]_D^{25} = +61.7$  ( $c=1.69$  in  $\text{CHCl}_3$ );  $^1\text{H}$  NMR (400 MHz,  $\text{CDCl}_3$ ):  $\delta$  = 7.96 (d,  $J$  = 8.2 Hz, 1H), 7.56 (dd,  $J$  = 7.6, 1.1 Hz, 1H), 7.45 (td,  $J$  = 8.0, 1.4 Hz, 1H), 7.32 (td,  $J$  = 7.6, 1.0 Hz, 1H), 7.26 (dd,  $J$  = 8.6, 7.6 Hz, 1H), 7.09 (t,  $J$  = 2.2, 1H), 7.05 (ddd,  $J$  = 7.9, 1.9, 0.8 Hz, 1H), 6.89 (ddd,  $J$  = 8.3, 2.5, 0.8 Hz, 1H), 3.78 (s, 3H), 1.62 (s, 9H);  $^{13}\text{C}$  NMR (101 MHz,  $\text{CDCl}_3$ ):  $\delta$  = 172.2, 160.0, 148.9, 139.2, 135.5, 130.4, 130.0, 128.5 (q,  $J$  = 310.8 Hz,  $\text{SCF}_3$ ), 126.9, 126.0, 124.8, 119.8, 115.7, 114.8, 113.7, 85.0, 59.4, 55.3, 28.0;  $^{19}\text{F}$  NMR (564 MHz,  $\text{CDCl}_3$ ):  $\delta$  = -38.9 (s,  $\text{SCF}_3$ ); IR (ATR):  $\tilde{\nu}$  = 2982, 2844, 2344, 2110, 2011, 1792, 1730, 1597, 1469, 1369, 1250, 1109, 1045, 939, 841, 763, 687  $\text{cm}^{-1}$ ; MS (ESI):  $m/z$  (%) = 462 ( $[\text{M}+\text{Na}]^+$ , 14), 457 ( $[\text{M}+\text{H}_2\text{O}]^+$ , 5), 385 (5), 384 (27), 340 (14), 238 (11); HPLC conditions: IA column, *n*-hexane/2-propanol = 99/1, flow rate = 1.0  $\text{mL min}^{-1}$ , minor enantiomer:  $t_R$  = 10.26 min; major enantiomer:  $t_R$  = 12.90 min (90% ee).

### (*S*)-*tert*-Butyl 3-(3-bromophenyl)-3-(trifluoromethanesulfonyl)-2-oxoindoline-1

#### -carboxylate

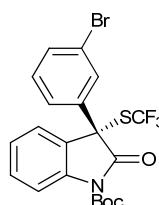

Isolated as a white solid, mp: 111–113 °C,  $[\alpha]_D^{25} = +51.4$  ( $c=1.50$  in  $\text{CHCl}_3$ );  $^1\text{H}$  NMR (400 MHz,  $\text{CDCl}_3$ ):  $\delta$  = 7.98 (d,  $J$  = 8.3 Hz, 1H), 7.62 (t,  $J$  = 1.9 Hz, 1H), 7.54 (dd,  $J$  = 7.6, 1.0 Hz, 1H), 7.52–7.45 (m, 3H), 7.34 (td,  $J$  = 7.6, 1.0 Hz, 1H), 7.25 (t,  $J$  = 8.0 Hz, 1H), 1.62 (s, 9H);  $^{13}\text{C}$  NMR (101 MHz,  $\text{CDCl}_3$ ):  $\delta$  = 171.8, 148.7, 139.2, 136.2, 132.6, 130.7, 130.5, 128.4 (q,  $J$  = 311.0 Hz,  $\text{SCF}_3$ ), 126.8, 126.5, 125.3, 125.1, 123.2, 115.9, 85.3, 58.9, 28.0;  $^{19}\text{F}$  NMR (376 MHz,  $\text{CDCl}_3$ ):  $\delta$  = -38.7 (s,  $\text{SCF}_3$ ); IR (ATR):  $\tilde{\nu}$  = 2983, 2289, 2103, 1774, 1739, 1600, 1470, 1338, 1289, 1250, 1105, 1024, 939, 841, 753,



681  $\text{cm}^{-1}$ ; MS (ESI):  $m/z$  (%) = 512 ( $[\text{M}+\text{Na}]^+ + 2$ , 30), 510 ( $[\text{M}+\text{Na}]^+$ , 28), 507 ( $[\text{M}+\text{H}_2\text{O}]^+ + 2$ , 18), 505 ( $[\text{M}+\text{H}_2\text{O}]^+$ , 18), 435 (14), 434 (79), 433 (13), 432 (78), 390 (15), 388 (15), 288 (19), 286 (19); HPLC conditions: IA column, *n*-hexane/2-propanol = 99/1, flow rate = 1.0  $\text{mL min}^{-1}$ , minor enantiomer:  $t_R$  = 5.38 min; major enantiomer:  $t_R$  = 7.53 min (88% ee).

### (*S*)-*tert*-Butyl 3-(naphthalen-2-yl)-3-(trifluoromethanesulfonyl)-2-oxindoline-1

#### -carboxylate

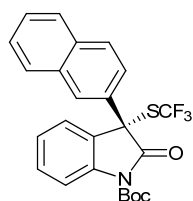

Isolated as a colorless oil,  $[\alpha]_D^{25} = +30.3$  ( $c=1.91$  in  $\text{CHCl}_3$ );  $^1\text{H NMR}$  (400 MHz,  $\text{CDCl}_3$ ):  $\delta$  = 8.01 (d,  $J$  = 8.2 Hz, 1H), 7.88–7.76 (m, 4H), 7.73 (dd,  $J$  = 8.8, 2.0 Hz, 1H), 7.64 (dd,  $J$  = 7.6, 1.1 Hz, 1H), 7.56–7.45 (m, 3H), 7.37 (td,  $J$  = 7.6, 1.0 Hz, 1H), 1.61 (s, 9H);  $^{13}\text{C NMR}$  (101 MHz,  $\text{CDCl}_3$ ):  $\delta$  = 172.3, 148.9, 139.3, 133.2, 132.9, 130.5, 130.1, 129.2, 128.6 (q,  $J$  = 311.0 Hz,  $\text{SCF}_3$ ), 128.5, 127.6, 127.5, 127.3, 127.0, 126.8, 126.1, 124.9, 124.4, 115.8, 85.1, 59.8, 28.0;  $^{19}\text{F NMR}$  (376 MHz,  $\text{CDCl}_3$ ):  $\delta$  =  $-38.6$  (s,  $\text{SCF}_3$ ); IR (ATR):  $\tilde{\nu}$  = 2983, 2309, 1738, 1602, 1470, 1339, 1288, 1249, 1106, 1025, 905, 820, 747, 677  $\text{cm}^{-1}$ ; MS (EI)  $m/z$  (%) = 459 ( $[\text{M}]^+$ , 5), 359 (11), 358 (30), 259 (21), 258 (100), 230 (6), 229 (4), 57 (23), 45 (11); HPLC conditions: IA column, *n*-hexane/2-propanol = 99/1, flow rate = 1  $\text{mL min}^{-1}$ , minor enantiomer:  $t_R$  = 9.49 min; major enantiomer:  $t_R$  = 27.82 min (88% ee).

### (*S*)-*tert*-Butyl 5-methyl-3-phenyl-3-(trifluoromethanesulfonyl)-2-oxindoline-1

#### -carboxylate

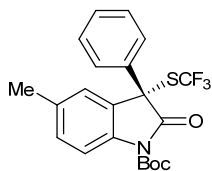

Isolated as a colorless oil,  $[\alpha]_D^{25} = +76.8$  ( $c=1.60$  in  $\text{CHCl}_3$ );  $^1\text{H NMR}$  (400 MHz,  $\text{CDCl}_3$ ):  $\delta$  = 7.83 (d,  $J$  = 8.4 Hz, 1H), 7.55–7.48 (m, 2H), 7.40–7.32 (m, 4H), 7.25 (d,  $J$  = 8.0, 1H), 2.42 (s, 3H), 1.61 (s, 9H);  $^{13}\text{C NMR}$  (101 MHz,  $\text{CDCl}_3$ ):  $\delta$  = 172.5, 149.0, 136.9, 134.6, 134.2, 131.0, 129.3, 129.1, 128.6 (q,  $J$  = 310.9 Hz,  $\text{SCF}_3$ ), 127.7, 127.2, 126.0, 115.5, 84.9, 59.7, 28.0, 21.1;  $^{19}\text{F NMR}$  (376 MHz,  $\text{CDCl}_3$ ):  $\delta$  =  $-38.9$  (s,  $\text{SCF}_3$ ); IR (ATR):  $\tilde{\nu}$  = 2981, 2328, 2104, 1773, 1738, 1603, 1468, 1340, 1292, 1249, 1142, 1096, 845, 751  $\text{cm}^{-1}$ ; MS (ESI):  $m/z$  (%) = 446 ( $[\text{M}+\text{Na}]^+$ , 22), 441 ( $[\text{M}+\text{H}_2\text{O}]^+$ , 10), 369 (5), 368 (29), 346 (10), 324 (8), 222 (10); HPLC conditions: IA column,

*n*-hexane/2-propanol = 99/1, flow rate = 1.0 mL min<sup>-1</sup>, minor enantiomer: *t*<sub>R</sub> = 6.21 min;  
major enantiomer: *t*<sub>R</sub> = 9.76 min (94% ee).

**(S)-tert-Butyl 5-tert-butyl-3-phenyl-3-(trifluoromethanesulfonyl)-2-oxoindoline-1-carboxylate**

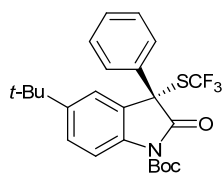

Isolated as a colorless oil,  $[\alpha]_D^{25} = +61.0$  (*c*=1.21 in CHCl<sub>3</sub>); <sup>1</sup>H NMR (400 MHz, CDCl<sub>3</sub>): δ = 7.85 (d, *J* = 8.7 Hz, 1H), 7.58 (d, *J* = 2.0 Hz, 1H), 7.54–7.49 (m, 2H), 7.47 (dd, *J* = 8.6, 2.1 Hz, 1H), 7.39–7.34 (m, 3H), 1.61 (s, 9H), 1.36 (s, 9H); <sup>13</sup>C NMR (101 MHz, CDCl<sub>3</sub>): δ = 172.8, 148.9, 148.1, 136.8, 134.3, 129.3, 129.1, 128.6 (q, *J* = 310.7 Hz, SCF<sub>3</sub>), 127.7, 127.1, 125.3, 124.2, 115.2, 84.8, 59.9, 34.7, 31.3, 28.0; <sup>19</sup>F NMR (376 MHz, CDCl<sub>3</sub>): δ = -38.9 (s, SCF<sub>3</sub>); IR (ATR):  $\tilde{\nu}$  = 2967, 2290, 1777, 1739, 1601, 1489, 1369, 1334, 1303, 1252, 1148, 1031, 925, 836, 757, 699, 576, 465 cm<sup>-1</sup>; MS (ESI): *m/z* (%) = 488 ([M+Na]<sup>+</sup>, 15), 411 (14), 410 (63), 366 (15), 309 (27), 264 (26), 254 (12); The enantiomeric excess was determined by chiral SFC using a (S,S) Whelk-01 column, 2% MeOH/CO<sub>2</sub>, 2 mL min<sup>-1</sup>, 231 nm; major enantiomer: *t*<sub>R</sub> = 5.72 min, minor enantiomer: *t*<sub>R</sub> = 9.21 min (92% ee).

**(S)-tert-Butyl 5-methoxy-3-phenyl-3-(trifluoromethanesulfonyl)-2-oxoindoline-1-carboxylate**

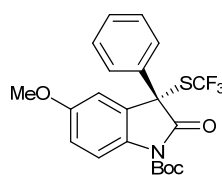

Isolated as a colorless oil,  $[\alpha]_D^{25} = +71.2$  (*c*=1.00 in CHCl<sub>3</sub>); <sup>1</sup>H NMR (600 MHz, CDCl<sub>3</sub>): δ = 7.89 (d, *J* = 9.0 Hz, 1H), 7.55–7.48 (m, 2H), 7.36 (dd, *J* = 5.2, 2.0 Hz, 3H), 7.10 (d, *J* = 2.6 Hz, 1H), 6.99 (dd, *J* = 9.0, 2.7 Hz, 1H), 3.85 (s, 3H), 1.61 (s, 9H); <sup>13</sup>C NMR (151 MHz, CDCl<sub>3</sub>): δ = 172.4, 157.0, 149.0, 134.1, 132.6, 129.4, 129.1, 128.5 (q, *J* = 311.0 Hz, SCF<sub>3</sub>), 127.7, 127.3, 116.8, 115.8, 112.4, 84.8, 59.8, 55.8, 28.0; <sup>19</sup>F NMR (282 MHz, CDCl<sub>3</sub>): δ -38.8 (s, SCF<sub>3</sub>); IR (ATR):  $\tilde{\nu}$  = 2980, 2841, 2424, 2288, 1775, 1736, 1602, 1488, 1334, 1280, 1152, 1036, 840, 756, 607, 567, 466 cm<sup>-1</sup>; MS (ESI): *m/z* (%) = 462 ([M+Na]<sup>+</sup>, 18), 385 (6), 384 (37), 362 (7), 340 (14), 238 (12); HPLC conditions: IA column, *n*-hexane/2-propanol = 99/1, flow rate = 1.0 mL min<sup>-1</sup>, minor enantiomer: *t*<sub>R</sub> = 9.09 min; major enantiomer: *t*<sub>R</sub> = 14.18 min (94% ee).

**(S)-tert-Butyl 5-fluoro-3-phenyl-3-(trifluoromethanesulfonyl)-2-oxoindoline-1**

**-carboxylate**

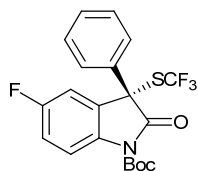

Isolated as a colorless oil,  $[\alpha]_D^{25} = +59.2$  ( $c=1.43$  in  $\text{CHCl}_3$ );  $^1\text{H}$  NMR (400 MHz,  $\text{CDCl}_3$ ):  $\delta = 7.98$  (dd,  $J = 9.0, 4.5$  Hz, 1H), 7.53–7.47 (m, 2H), 7.42–7.35 (m, 3H), 7.29 (dd,  $J = 7.6, 2.7$  Hz, 1H), 7.17 (td,  $J = 8.9, 2.7$  Hz, 1H), 1.61 (s, 9H);  $^{13}\text{C}$  NMR (101 MHz,  $\text{CDCl}_3$ ):  $\delta = 171.9, 159.9$  (d,  $J = 245.1$  Hz), 148.9, 135.2 (d,  $J = 2.4$  Hz), 133.5, 129.6, 129.3, 128.4 (q,  $J = 311.0$  Hz,  $\text{SCF}_3$ ), 128.0 (d,  $J = 8.3$  Hz), 127.5, 117.3 (d,  $J = 22.9$  Hz), 117.3 (d,  $J = 7.8$  Hz), 114.0 (d,  $J = 25.1$  Hz), 85.3, 59.4, 28.0;  $^{19}\text{F}$  NMR (564 MHz,  $\text{CDCl}_3$ ):  $\delta = -38.8$  (s,  $\text{SCF}_3$ ), -116.42–116.48 (m, F); IR (ATR):  $\tilde{\nu} = 2982, 2931, 2263, 1774, 1737, 1597, 1488, 1330, 1253, 1110, 1033, 910, 826, 729$   $\text{cm}^{-1}$ ; MS (ESI):  $m/z$  (%) = 450 ( $[\text{M}+\text{Na}]^+$ , 17), 445 ( $[\text{M}+\text{H}_2\text{O}]^+$ , 12), 410 (7), 373 (10), 372 (56), 350 (6), 209 (22), 226 (12); HPLC conditions: IA column, *n*-hexane/2-propanol = 99/1, flow rate = 1.0  $\text{mL min}^{-1}$ , minor enantiomer:  $t_R = 5.23$  min; major enantiomer:  $t_R = 8.95$  min (90% ee).

**(S)-tert-Butyl 5-chloro-3-phenyl-3-(trifluoromethanesulfonyl)-2-oxoindoline-1**

**-carboxylate**

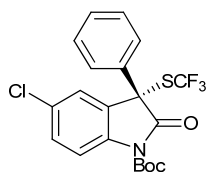

Isolated as a colorless oil,  $[\alpha]_D^{25} = +75.0$  ( $c=1.50$  in  $\text{CHCl}_3$ );  $^1\text{H}$  NMR (600 MHz,  $\text{CDCl}_3$ ):  $\delta = 7.94$  (d,  $J = 8.8$  Hz, 1H), 7.54 (d,  $J = 2.2$  Hz, 1H), 7.53–7.47 (m, 2H), 7.43 (dd,  $J = 8.8, 2.3$  Hz, 1H), 7.42–7.35 (m, 3H), 1.61 (s, 9H);  $^{13}\text{C}$  NMR (151 MHz,  $\text{CDCl}_3$ ):  $\delta = 171.6, 148.7, 137.7, 133.4, 130.5, 130.4, 129.7, 129.3, 128.4$  (q,  $J = 311.1$  Hz,  $\text{SCF}_3$ ), 128.0, 127.5, 126.8, 117.0, 85.5, 59.2, 28.0;  $^{19}\text{F}$  NMR (282 MHz,  $\text{CDCl}_3$ ):  $\delta = -38.7$  (s,  $\text{SCF}_3$ ); IR (ATR):  $\tilde{\nu} = 3460, 2984, 2934, 2271, 1780, 1740, 1595, 1474, 1372, 1331, 1290, 1256, 1150, 1028, 959, 863, 830, 757, 700, 553, 471$   $\text{cm}^{-1}$ ; MS (ESI):  $m/z$  (%) = 468 ( $[\text{M}+\text{Na}]^+$ +2, 14), 466 ( $[\text{M}+\text{Na}]^+$ , 38), 463 ( $[\text{M}+\text{H}_2\text{O}]^+$ +2, 11), 461 ( $[\text{M}+\text{H}_2\text{O}]^+$ , 33), 391 (6), 390 (37), 389 (17), 388 (100), 368 (4), 366 (13), 344 (7), 244 (8), 242 (25); HPLC conditions: IA column, *n*-hexane/2-propanol = 99/1, flow rate = 1.0  $\text{mL min}^{-1}$ , minor enantiomer:  $t_R = 4.90$  min; major enantiomer:  $t_R = 8.08$  min (86% ee).

**(S)-tert-Butyl 5-bromo-3-phenyl-3-(trifluoromethanesulfonyl)-2-oxindoline-1-carboxylate**

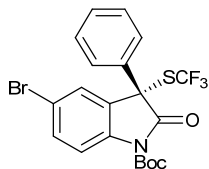

Isolated as a colorless oil,  $[\alpha]_D^{25} = +76.3$  ( $c=1.97$  in  $\text{CHCl}_3$ );  $^1\text{H}$  NMR (400 MHz,  $\text{CDCl}_3$ ):  $\delta$  7.89 (d,  $J = 8.8$  Hz, 1H), 7.68 (d,  $J = 2.1$  Hz, 1H), 7.58 (dd,  $J = 8.8, 2.1$  Hz, 1H), 7.53–7.46 (m, 2H), 7.43–7.35 (m, 3H), 1.61 (s, 9H);  $^{13}\text{C}$  NMR (101 MHz,  $\text{CDCl}_3$ ):  $\delta = 171.5, 148.7, 138.3, 133.4, 129.6, 129.3, 128.4$  (q,  $J = 311.1$  Hz,  $\text{SCF}_3$ ), 128.3, 127.5, 117.8, 117.4, 85.5, 59.1, 28.0;  $^{19}\text{F}$  NMR (376 MHz,  $\text{CDCl}_3$ ):  $\delta = -38.7$  (s,  $\text{SCF}_3$ ); IR (ATR):  $\tilde{\nu} = 3460, 2984, 2934, 2268, 1778, 1739, 1599, 1471, 1371, 1331, 1291, 1255, 1149, 1114, 1025, 951, 863, 829, 758, 693, 613, 541, 468$   $\text{cm}^{-1}$ ; MS (ESI):  $m/z$  (%) = 512 ( $[\text{M}+\text{Na}]^++2$ , 11), 510 ( $[\text{M}+\text{Na}]^+$ , 12), 507 ( $[\text{M}+\text{H}_2\text{O}]^++2$ , 16), 505 ( $[\text{M}+\text{H}_2\text{O}]^+$ , 17), 435 (16), 434 (91), 433 (15), 432 (89), 427 (36), 355 (17), 354 (100), 288 (10), 286 (10); The enantiomeric excess was determined by chiral SFC using a (S,S) Whelk-01 column, 2% MeOH/ $\text{CO}_2$ , 4 mL  $\text{min}^{-1}$ , 231 nm; major enantiomer:  $t_R = 5.08$  min, minor enantiomer:  $t_R = 7.06$  min (85% ee).

**X-Ray Crystallographic Analysis of 7k:**

Suitable crystals for single crystal analysis were obtained by recrystallization from a DCM/hexane mixture and slow evaporation of the solvent at ambient temperature. Intensity data were collected at 100 K with a *Bruker APEX* area detector equipped with an *Incoatec microsource* (Mo- $\text{K}\alpha$ ,  $\lambda = 0.71073$  Å, multilayer optics). Temperature was controlled with an *Oxford Cryostream 700* instrument. Intensities were processed with *SAINT*<sup>4</sup> and corrected for absorption by multi-scan methods using *SADABS*<sup>5</sup>.

The crystal structure of **6k** was solved by direct methods (SHELXS-97)<sup>6</sup> and refined by full matrix least squares procedures based on  $F^2$  as implemented in SHELXL-13<sup>6</sup>. Non-hydrogen atoms were assigned anisotropic displacement parameters and hydrogen atoms were placed in idealized positions. The crystal data and refinement results are summarized in Table 1.

After the assignment of the well ordered electron density maxima, residual density close to

C3 indicated minor positional disorder of the bromine atom. The introduction of a split model with two alternative bromine positions converged with a 90/10 ration.

**Table 1:** Crystal data and refinement results of **6k**

| Parameter                                      | <b>6K</b>                                                          |
|------------------------------------------------|--------------------------------------------------------------------|
| Empirical formula                              | C <sub>20</sub> H <sub>17</sub> BrF <sub>3</sub> NO <sub>3</sub> S |
| <i>M</i> /g mol <sup>-1</sup>                  | 488.32                                                             |
| Crystal dimensions/mm                          | 0.09 x 0.09 x 0.12                                                 |
| Crystal shape                                  | Plate                                                              |
| Crystal color                                  | Colorless                                                          |
| Crystal system                                 | Orthorhombic                                                       |
| Space group (no.)                              | <i>P</i> 2 <sub>1</sub> 2 <sub>1</sub> 2 <sub>1</sub>              |
| <i>a</i> /Å                                    | 9.7850(8)                                                          |
| <i>b</i> /Å                                    | 14.3183(11)                                                        |
| <i>c</i> /Å                                    | 14.4323(11)                                                        |
| <i>α</i> /°                                    | 90                                                                 |
| <i>β</i> /°                                    | 90                                                                 |
| <i>γ</i> /°                                    | 90                                                                 |
| <i>V</i> /Å <sup>3</sup>                       | 2022.0(3)                                                          |
| <i>Z</i>                                       | 4                                                                  |
| <i>μ</i> (Mo K <sub>α</sub> )/mm <sup>-1</sup> | 2.185                                                              |
| Total reflections                              | 29388                                                              |
| Unique reflections                             | 5385                                                               |
| Flack parameter                                | 0.020(4)                                                           |
| Variables refined                              | 275                                                                |
| <i>R</i> <sub>int</sub>                        | 0.0536                                                             |
| <i>wR</i> <sub>2</sub> (all reflections)       | 0.0653                                                             |
| <i>R</i> <sub>I</sub> (all/obs.)               | 0.0335/0.0301                                                      |
| GOF on <i>F</i> <sup>2</sup>                   | 1.073                                                              |
| Diff. peak/hole [e/ Å <sup>-3</sup> ]          | 0.361/-0.216                                                       |

## References:

1. Y. Hamashima, T. Suzuki, H. Takano, Y. Shimura and M. Sodeoka, *M. J. Am. Chem. Soc.* 2005, **127**, 10164.
2. M. J. Durbin and M. C. Willis, *Org. Lett.*, 2008, **10**, 1413.
3. S. -W. Duan, J. An, J. -R. Chen and W. -J. Xiao, *Org. Lett.*, 2011, **13**, 2290.
4. SAINT, *Bruker AXS, Program for Reduction of Data collected on Bruker CCD Area Detector Diffractometer V.6.02*, Bruker AXS Inc., Madison, WI, USA, 1999.
5. SADABS, *Program for Empirical Absorption Correction of Area Detector Data V 2004/1*, Bruker AXS Inc., Madison, WI, USA, 2004.
6. (a) G. M. Sheldrick, *SHELXL-13 Program for Crystal Structure Refinement*, Universität Göttingen, 2013; (b) G. Sheldrick, *Acta Crystallogr., Sect. A* 2008, **64**, 112.

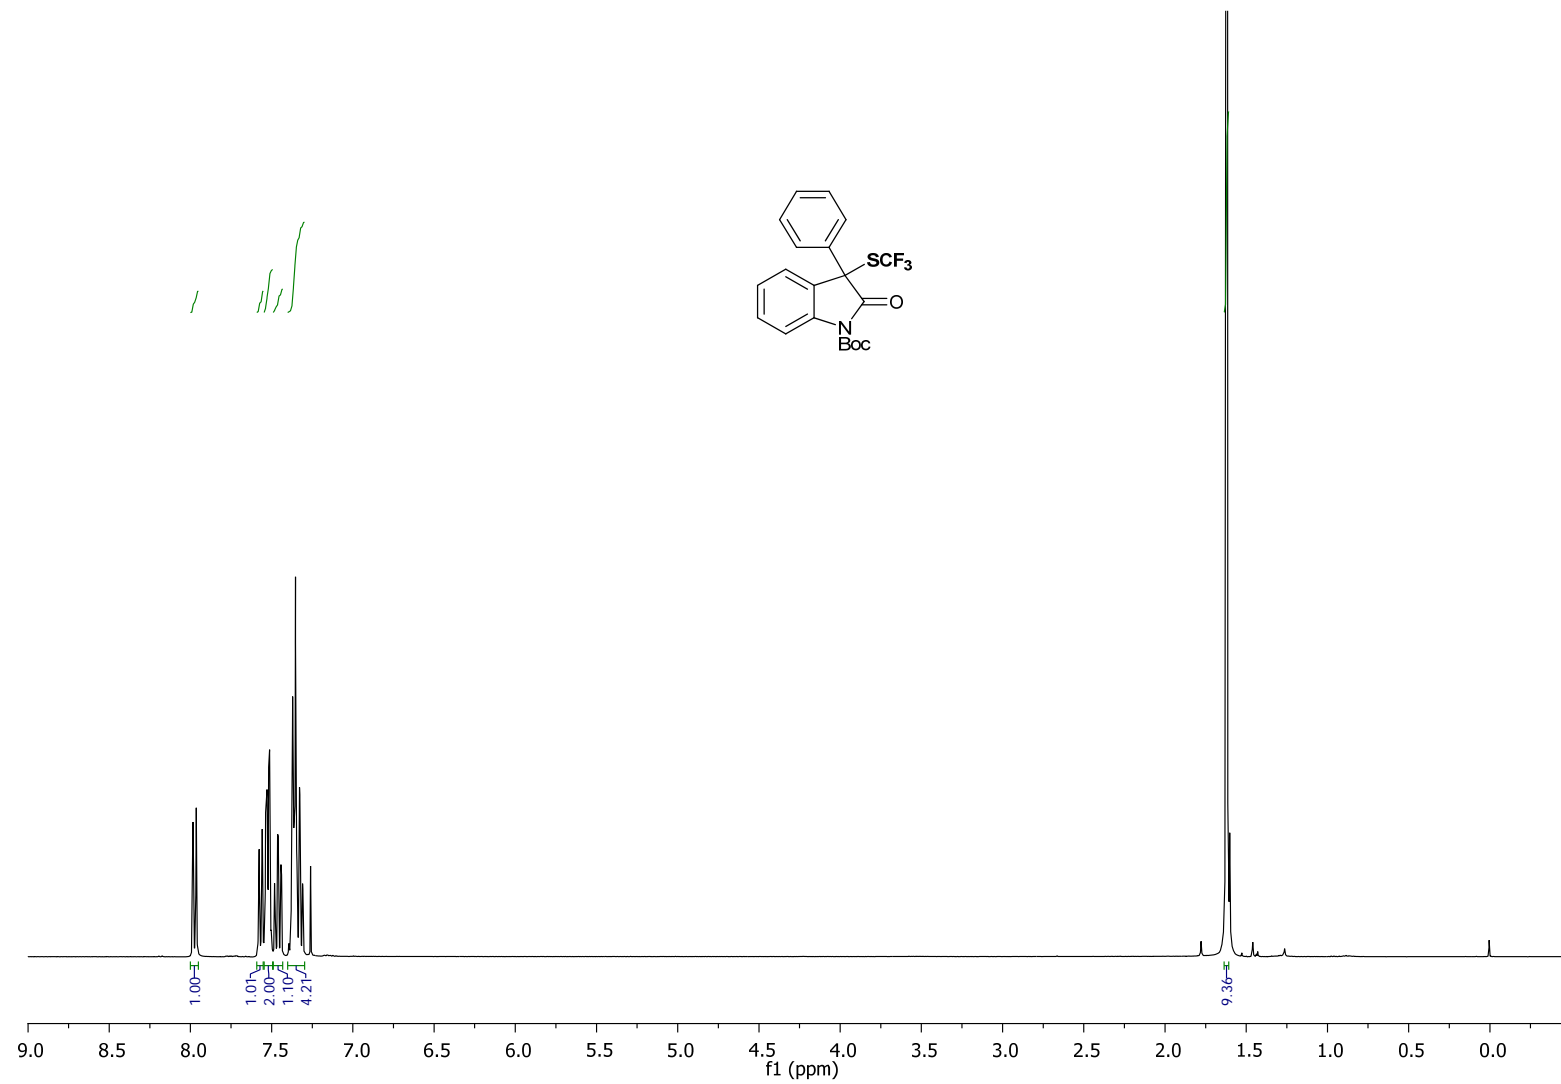

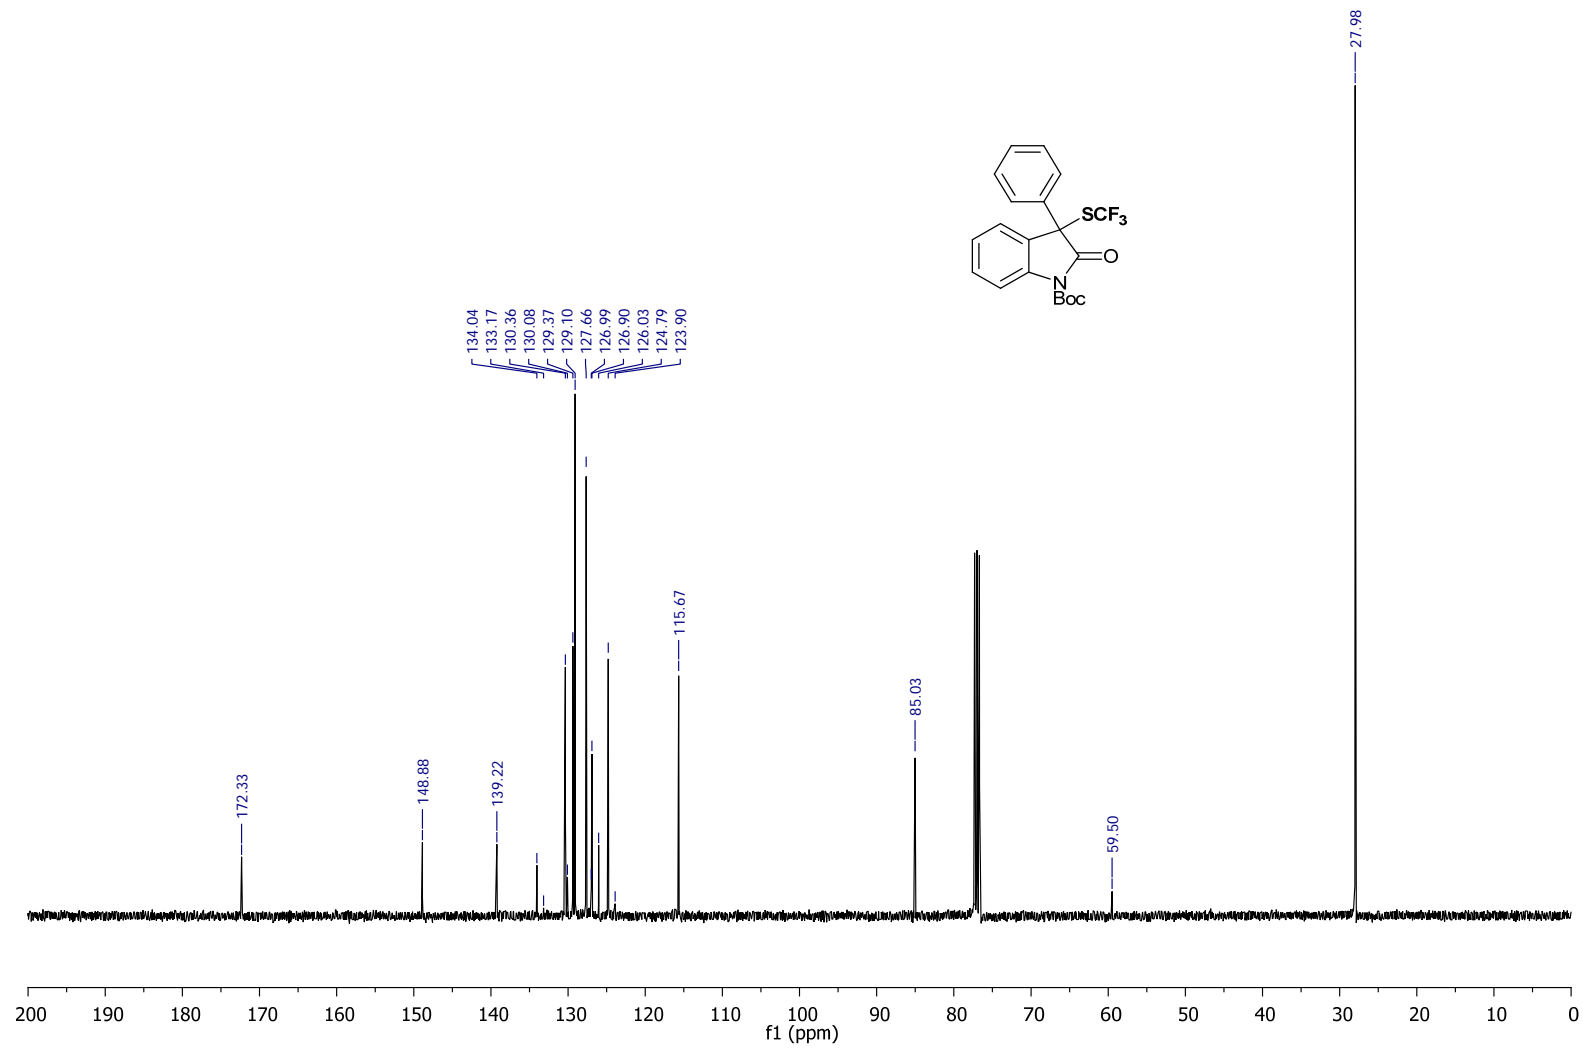



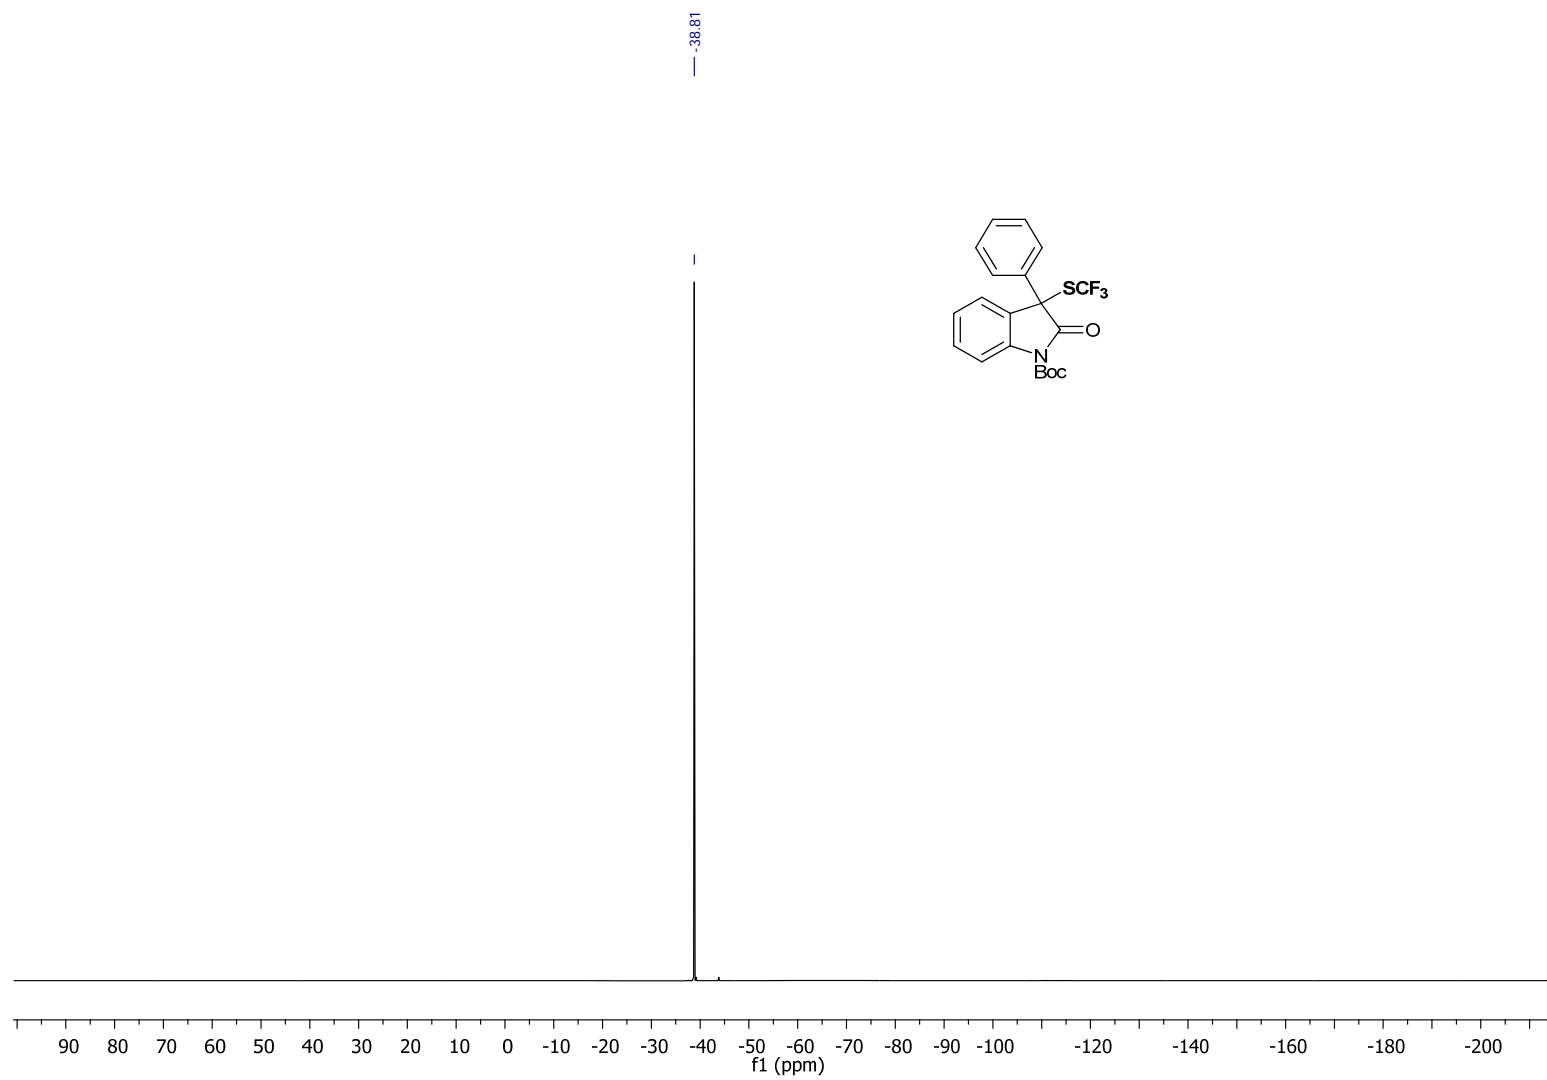

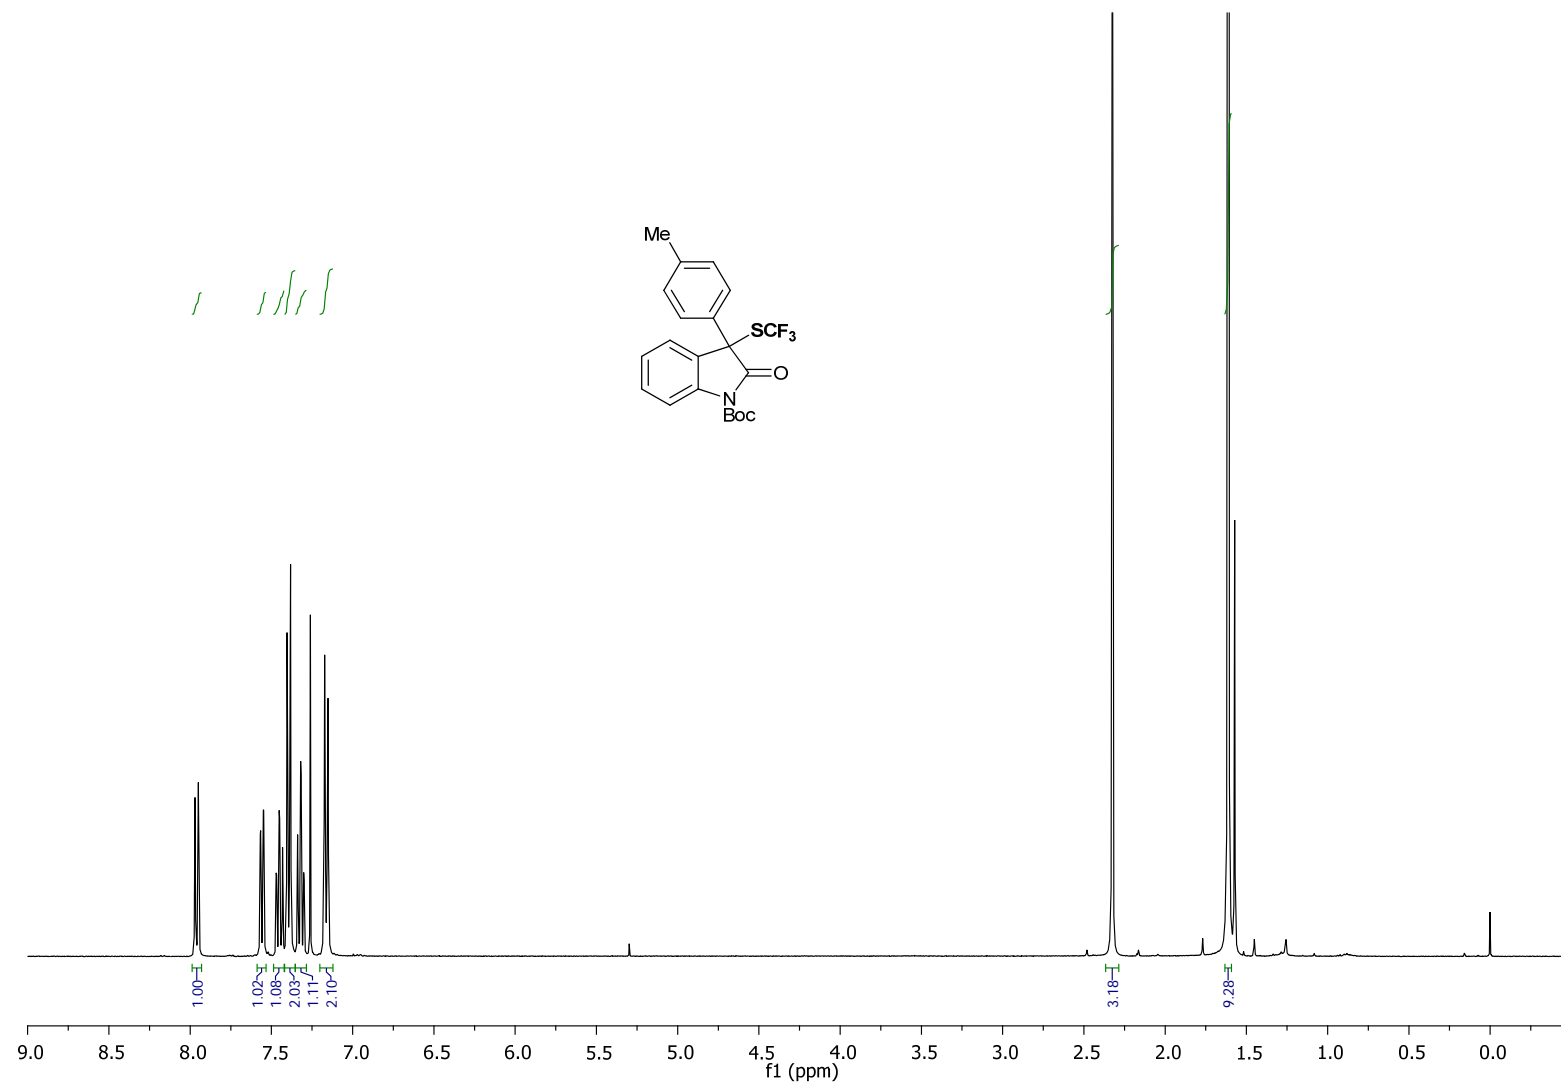

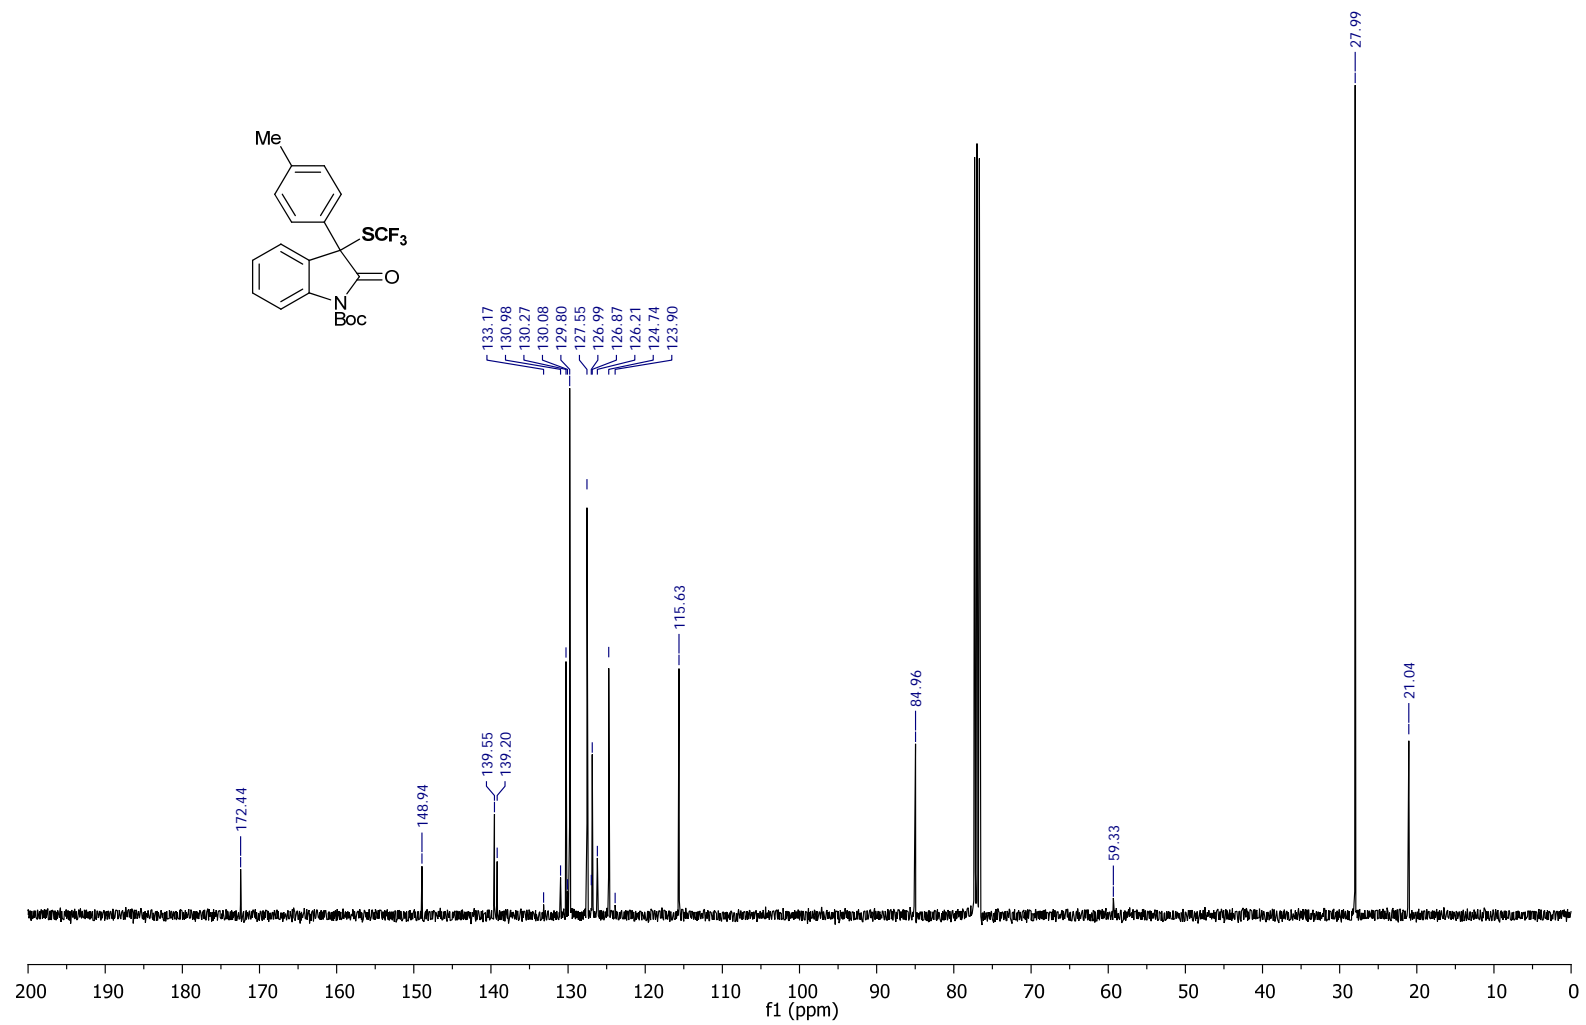

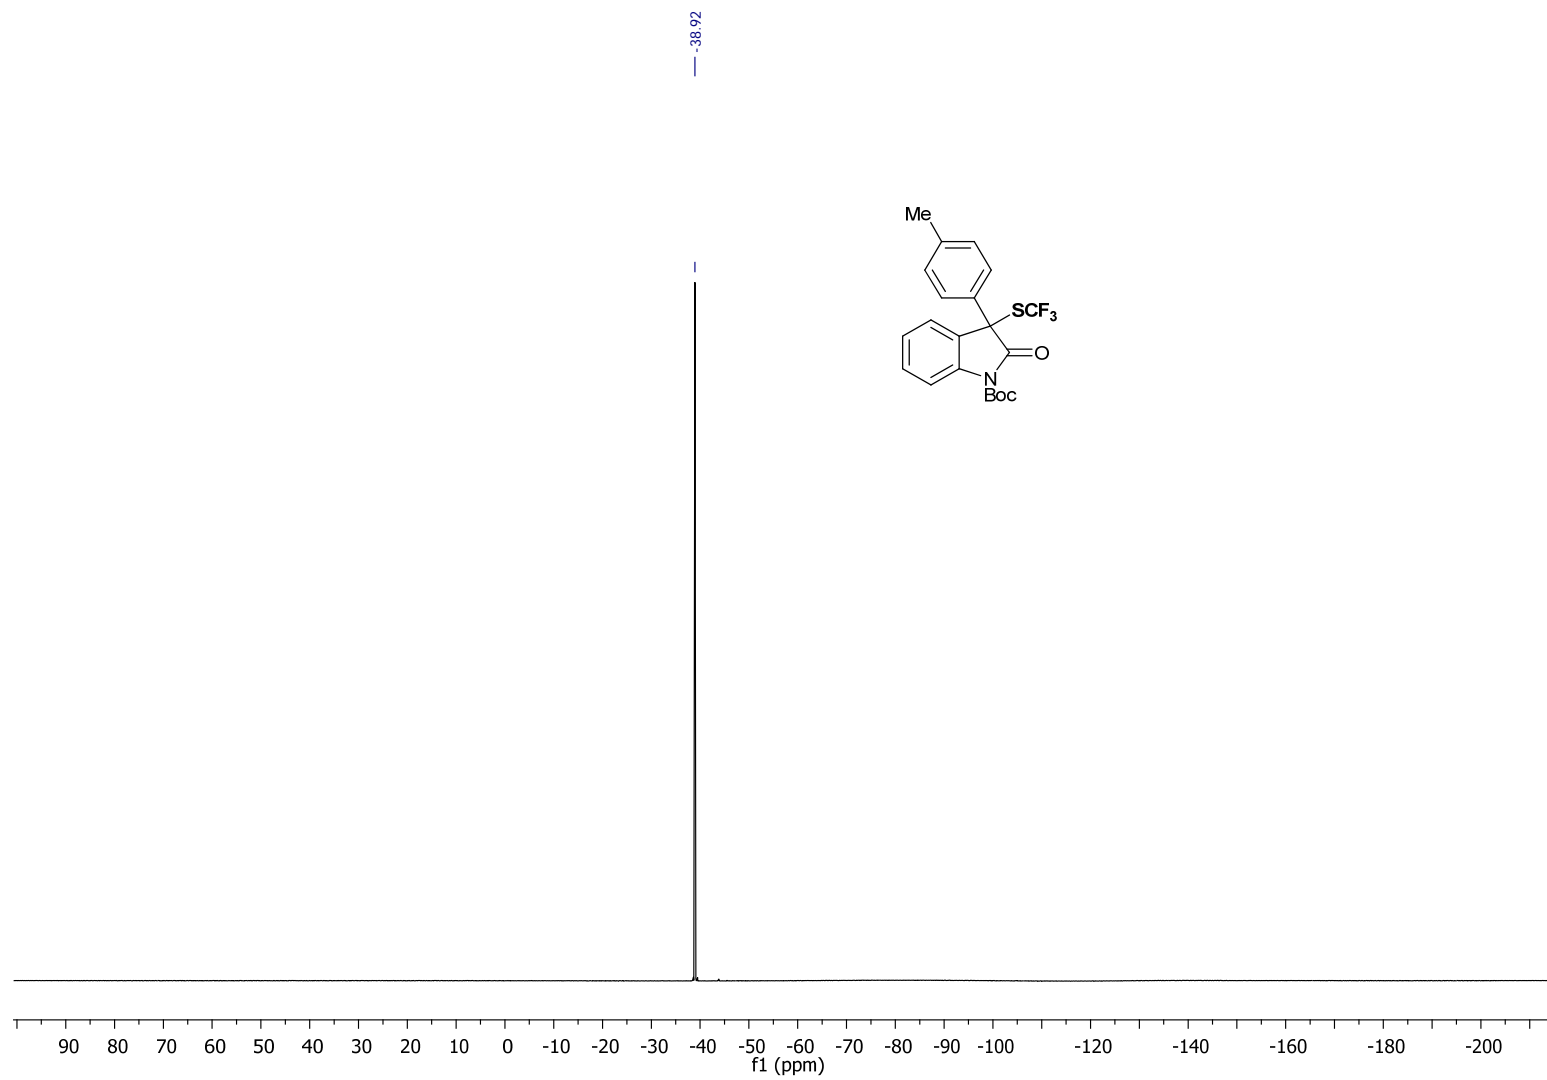

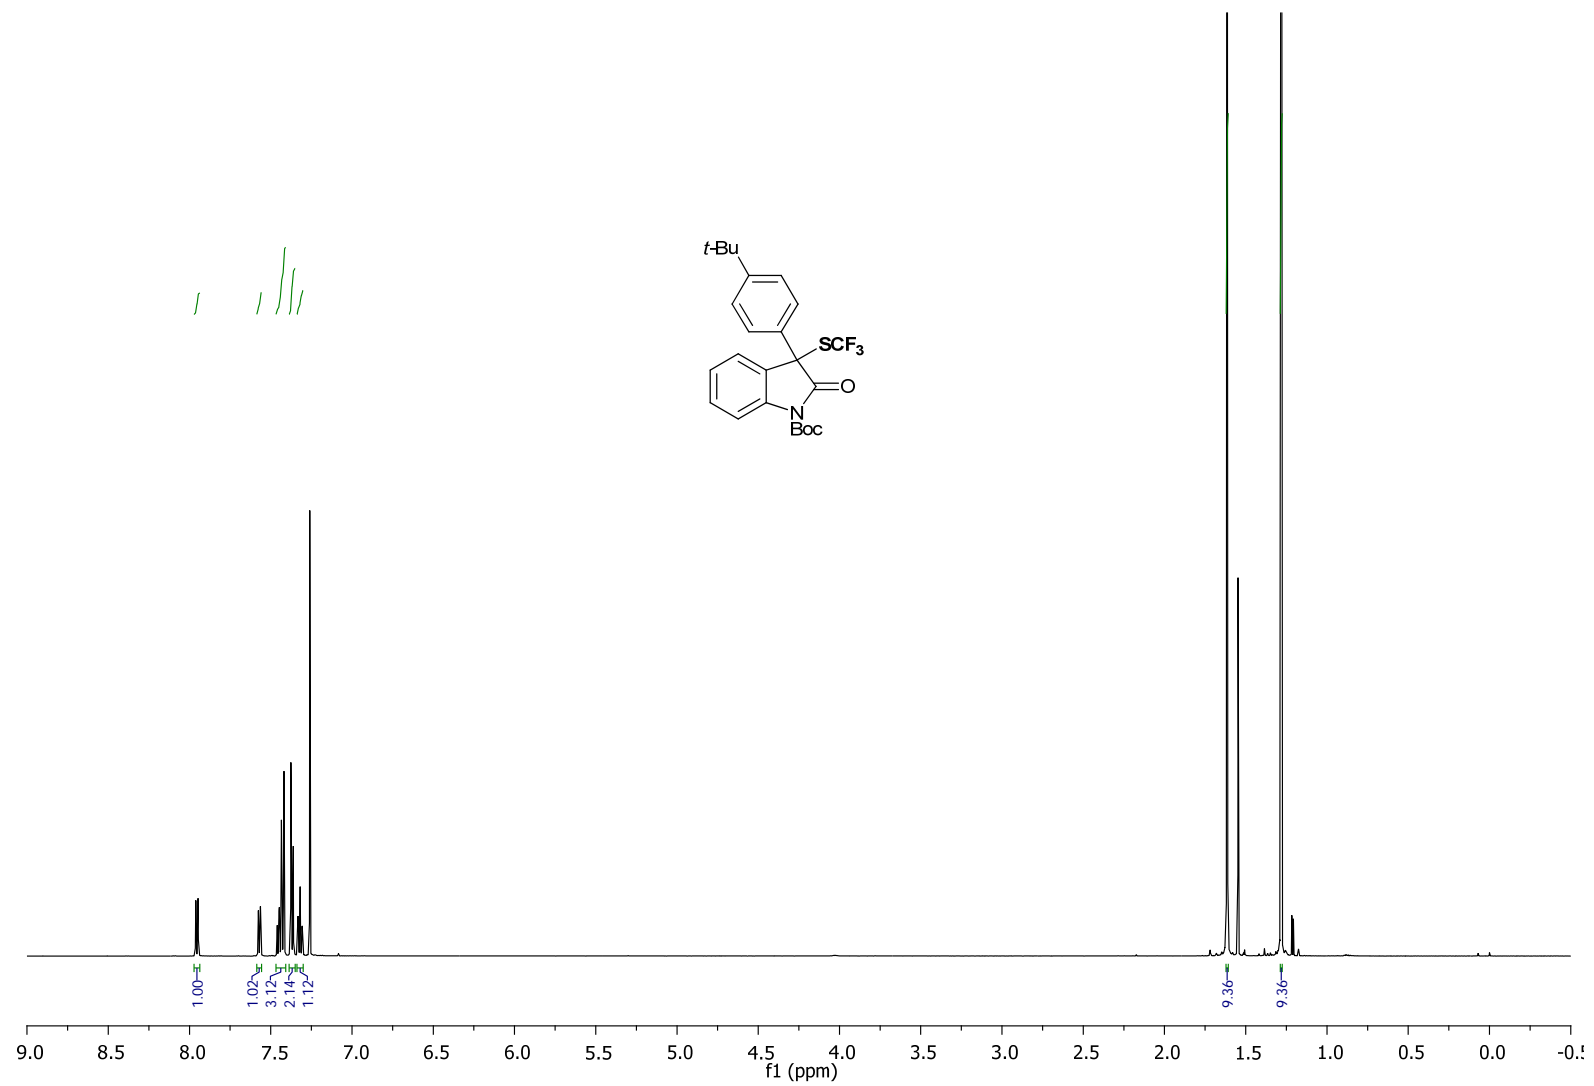

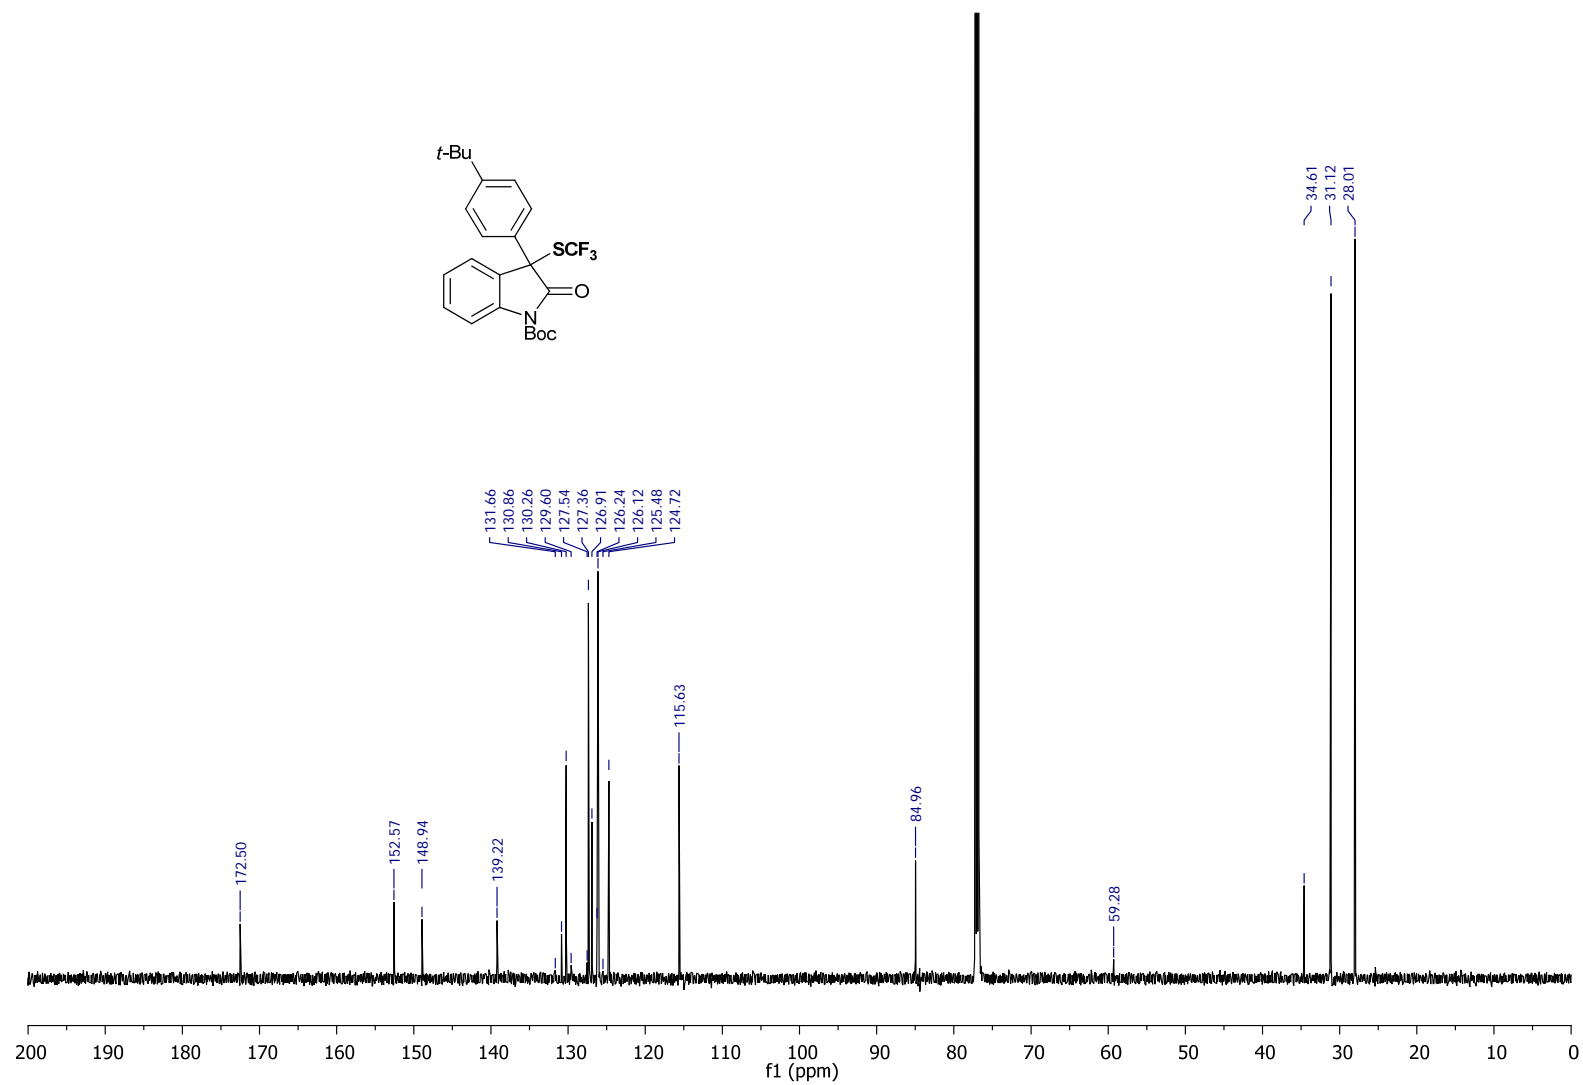

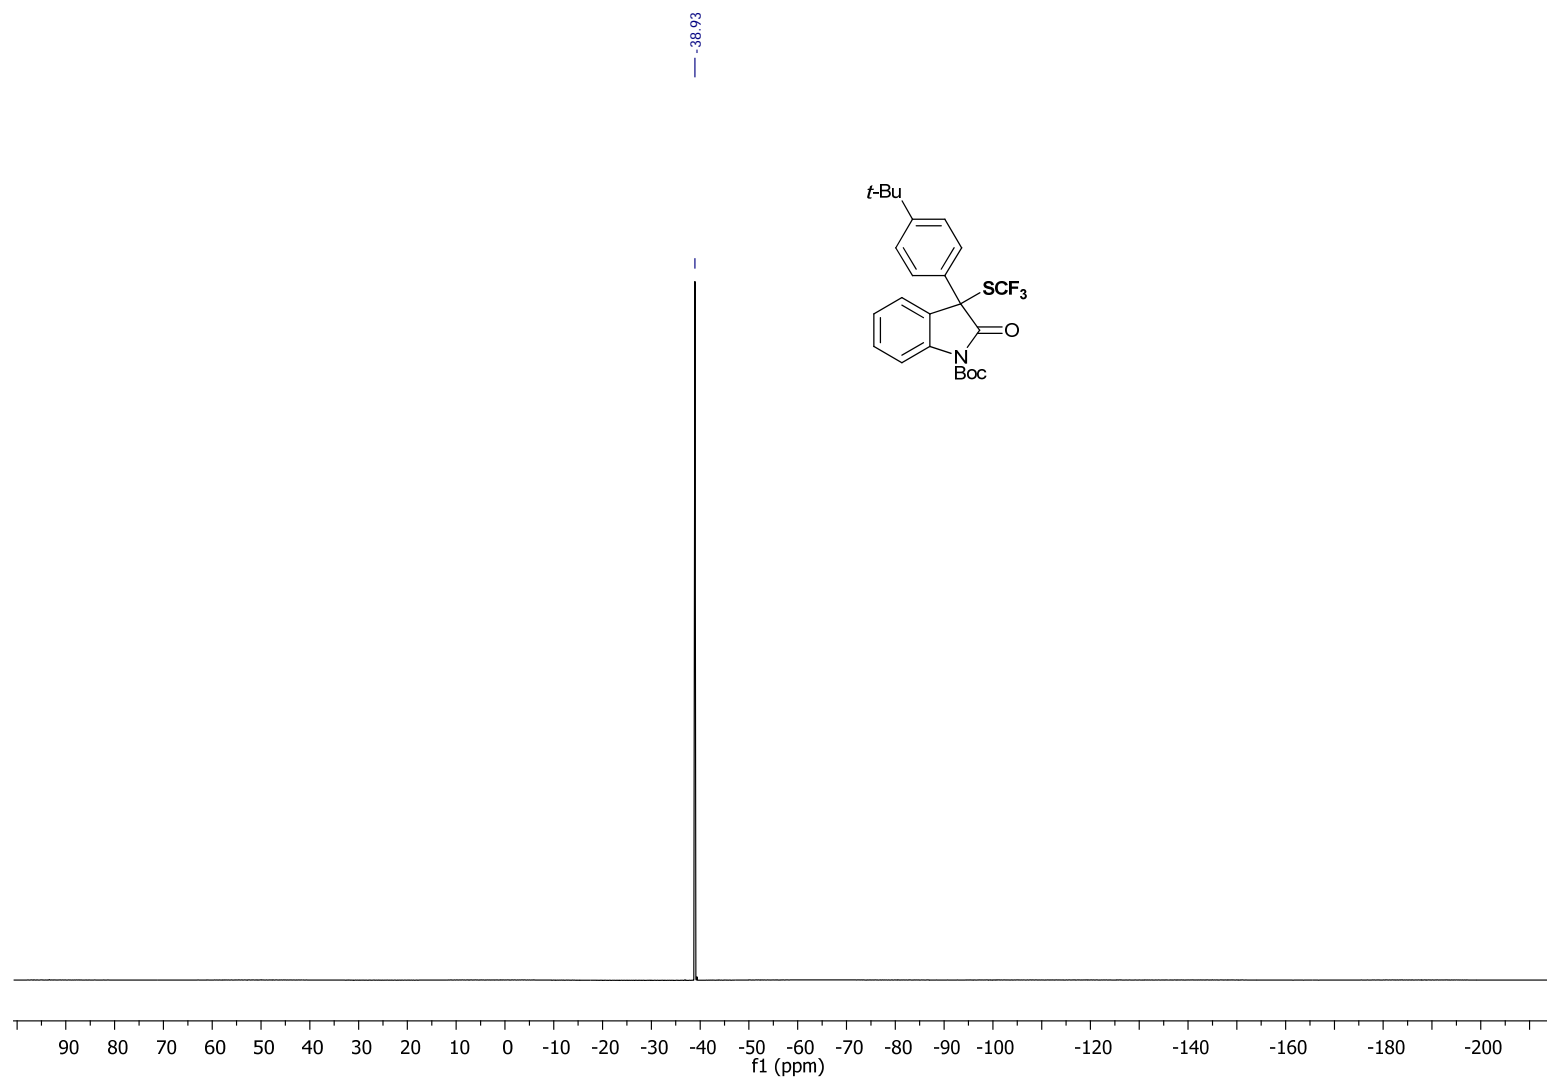

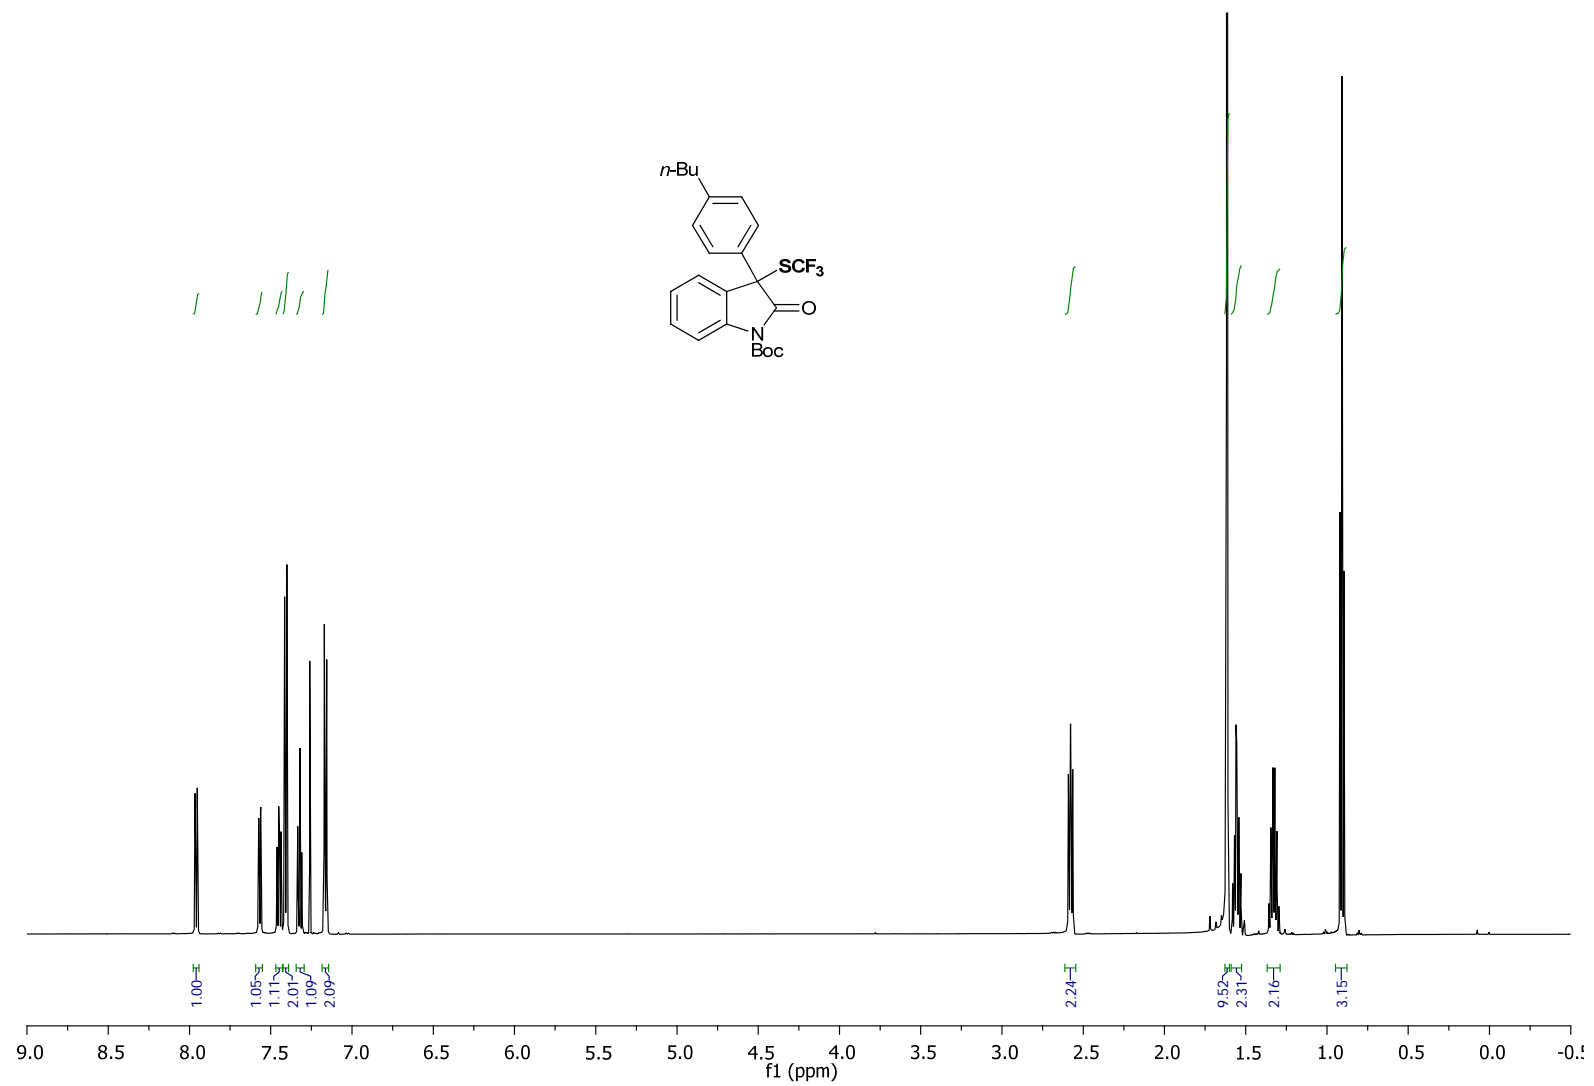



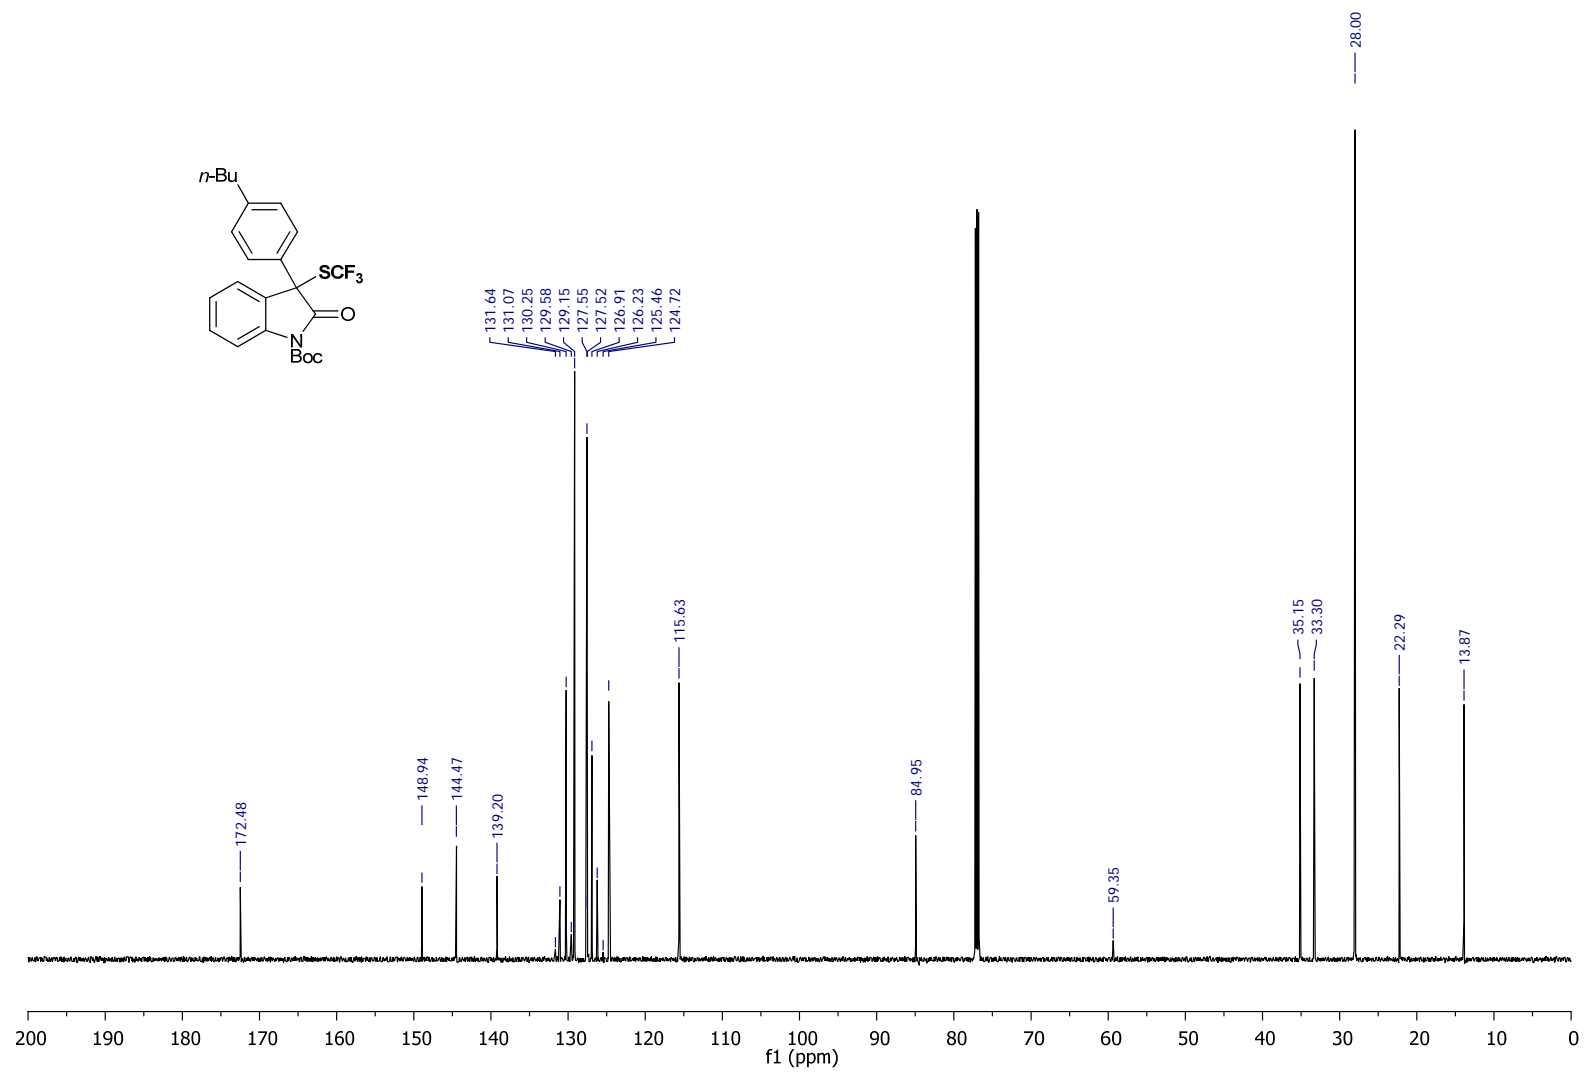

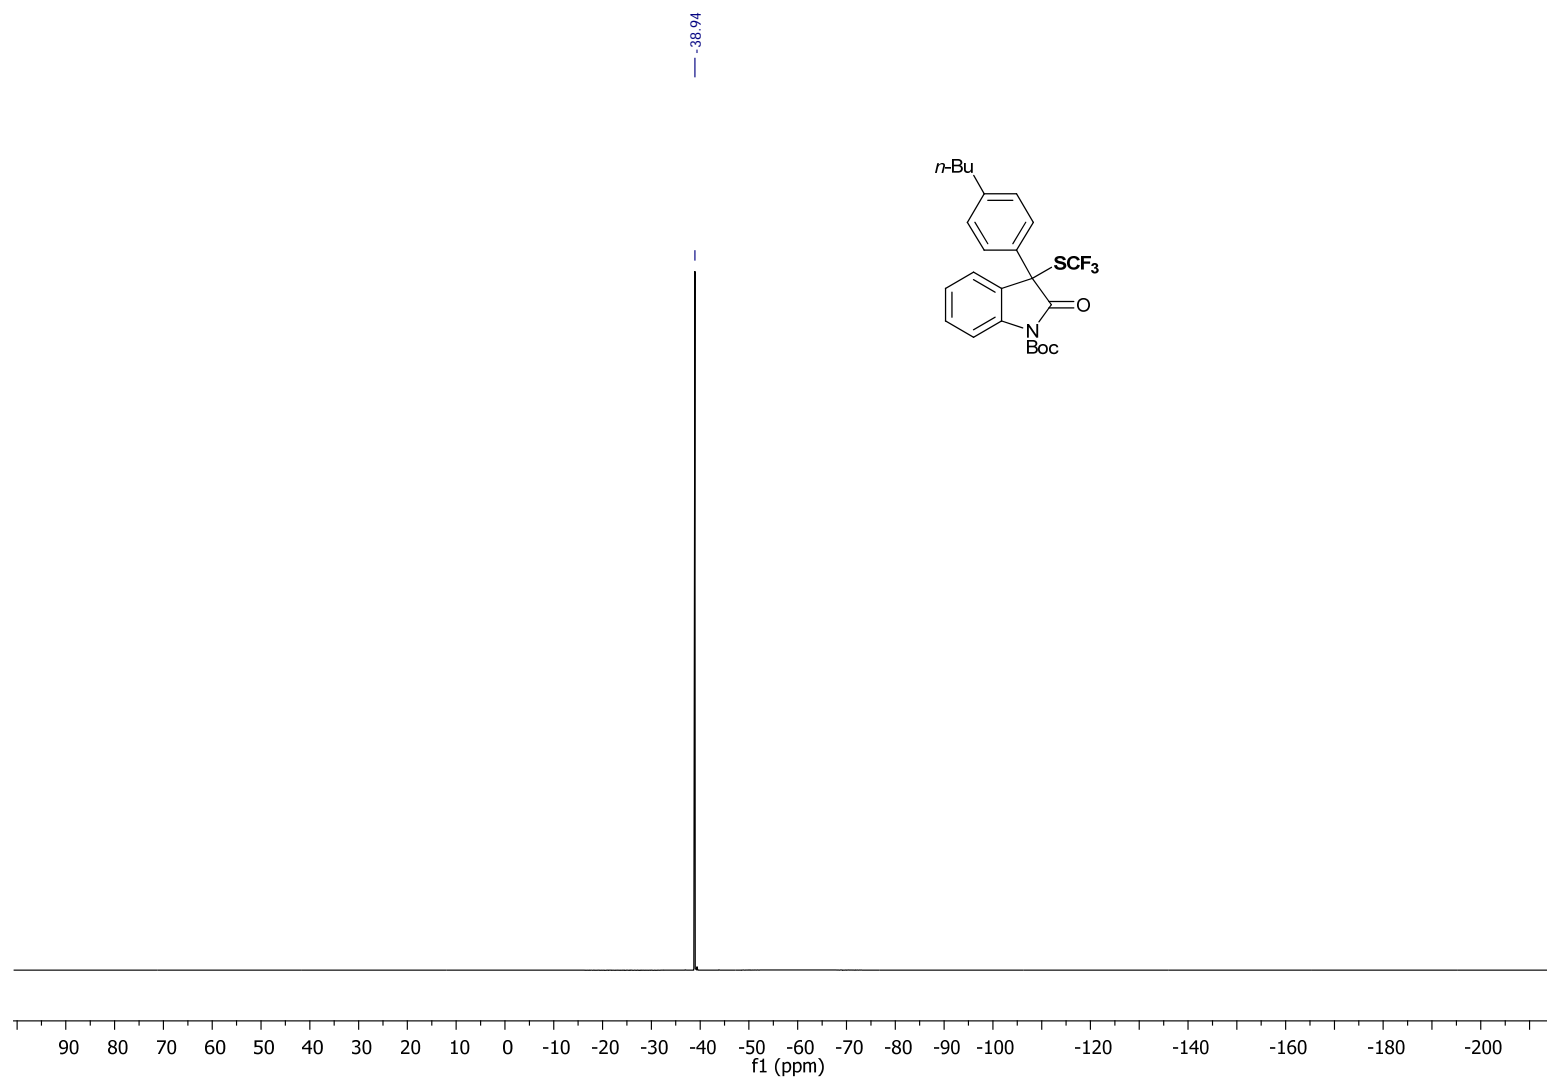

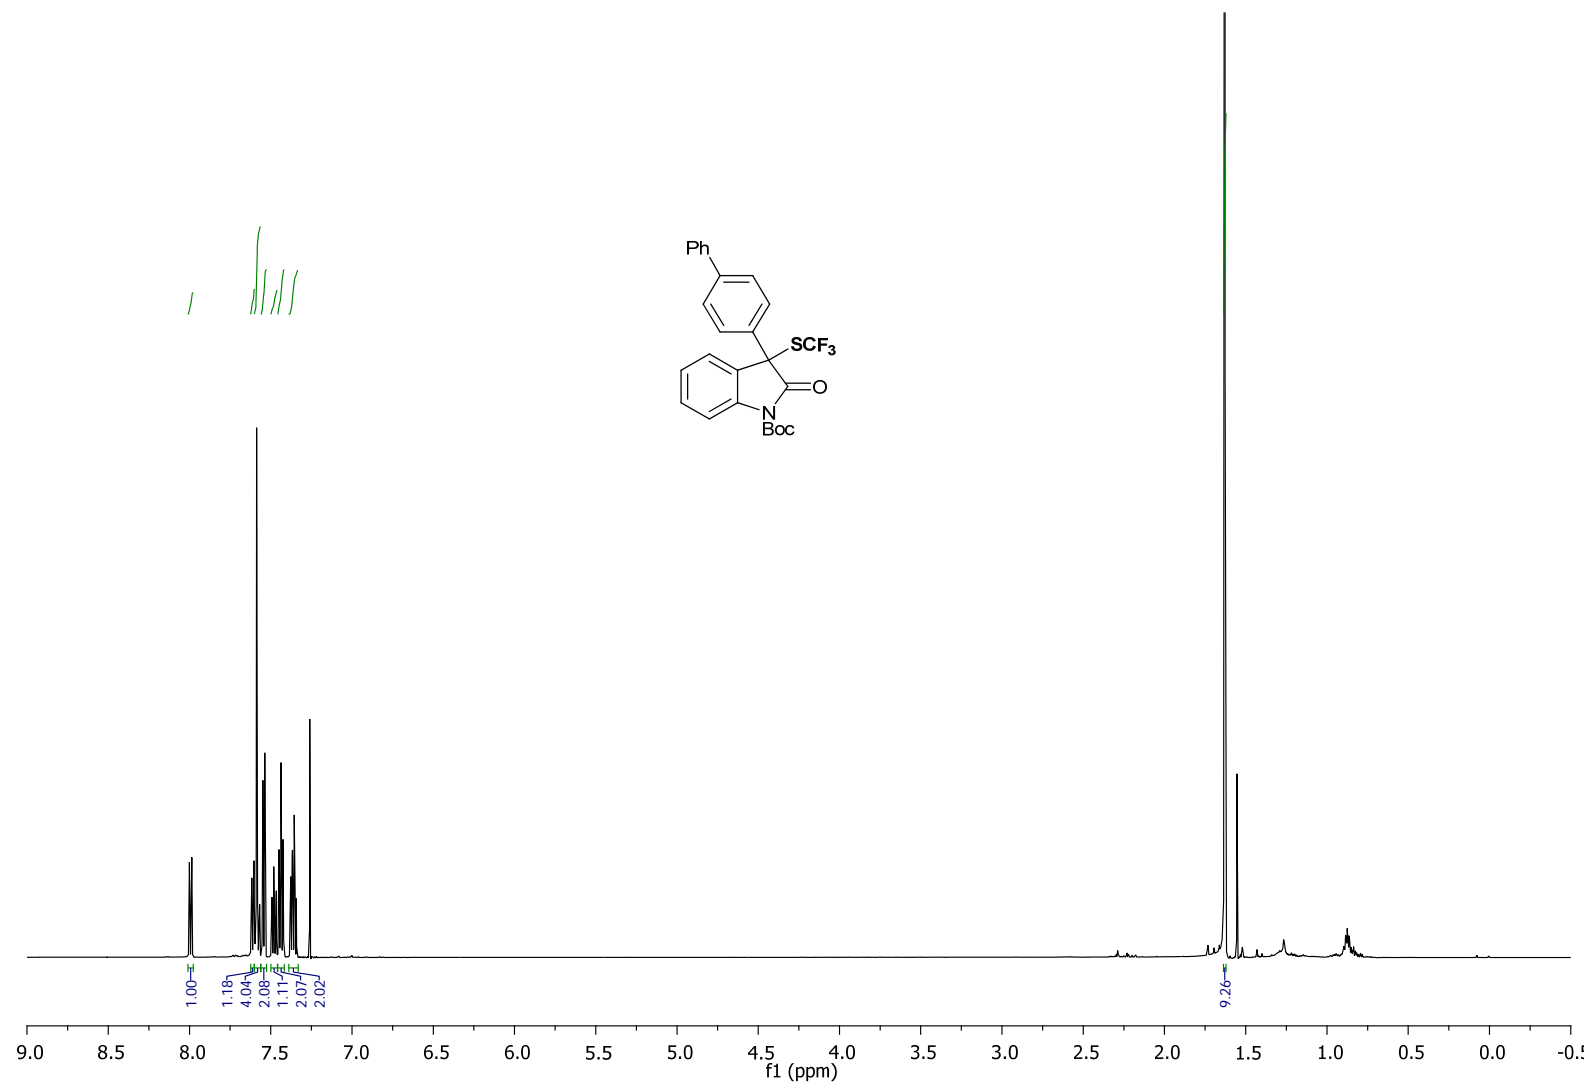

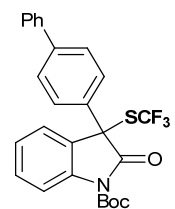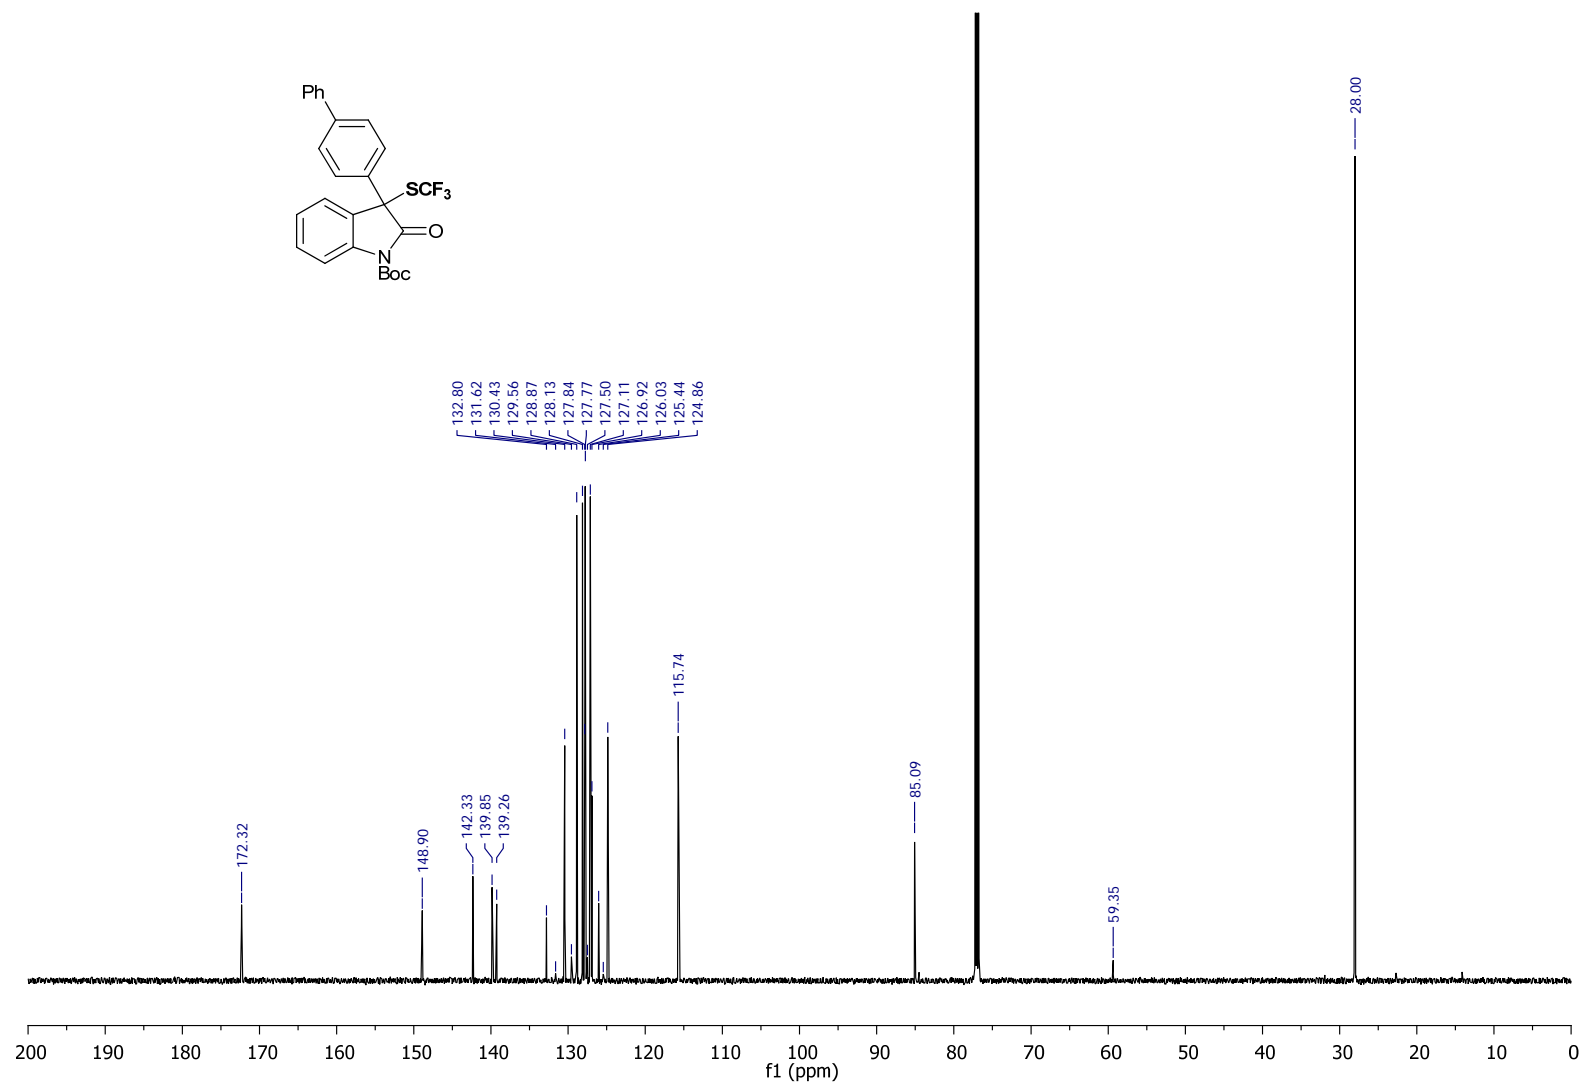

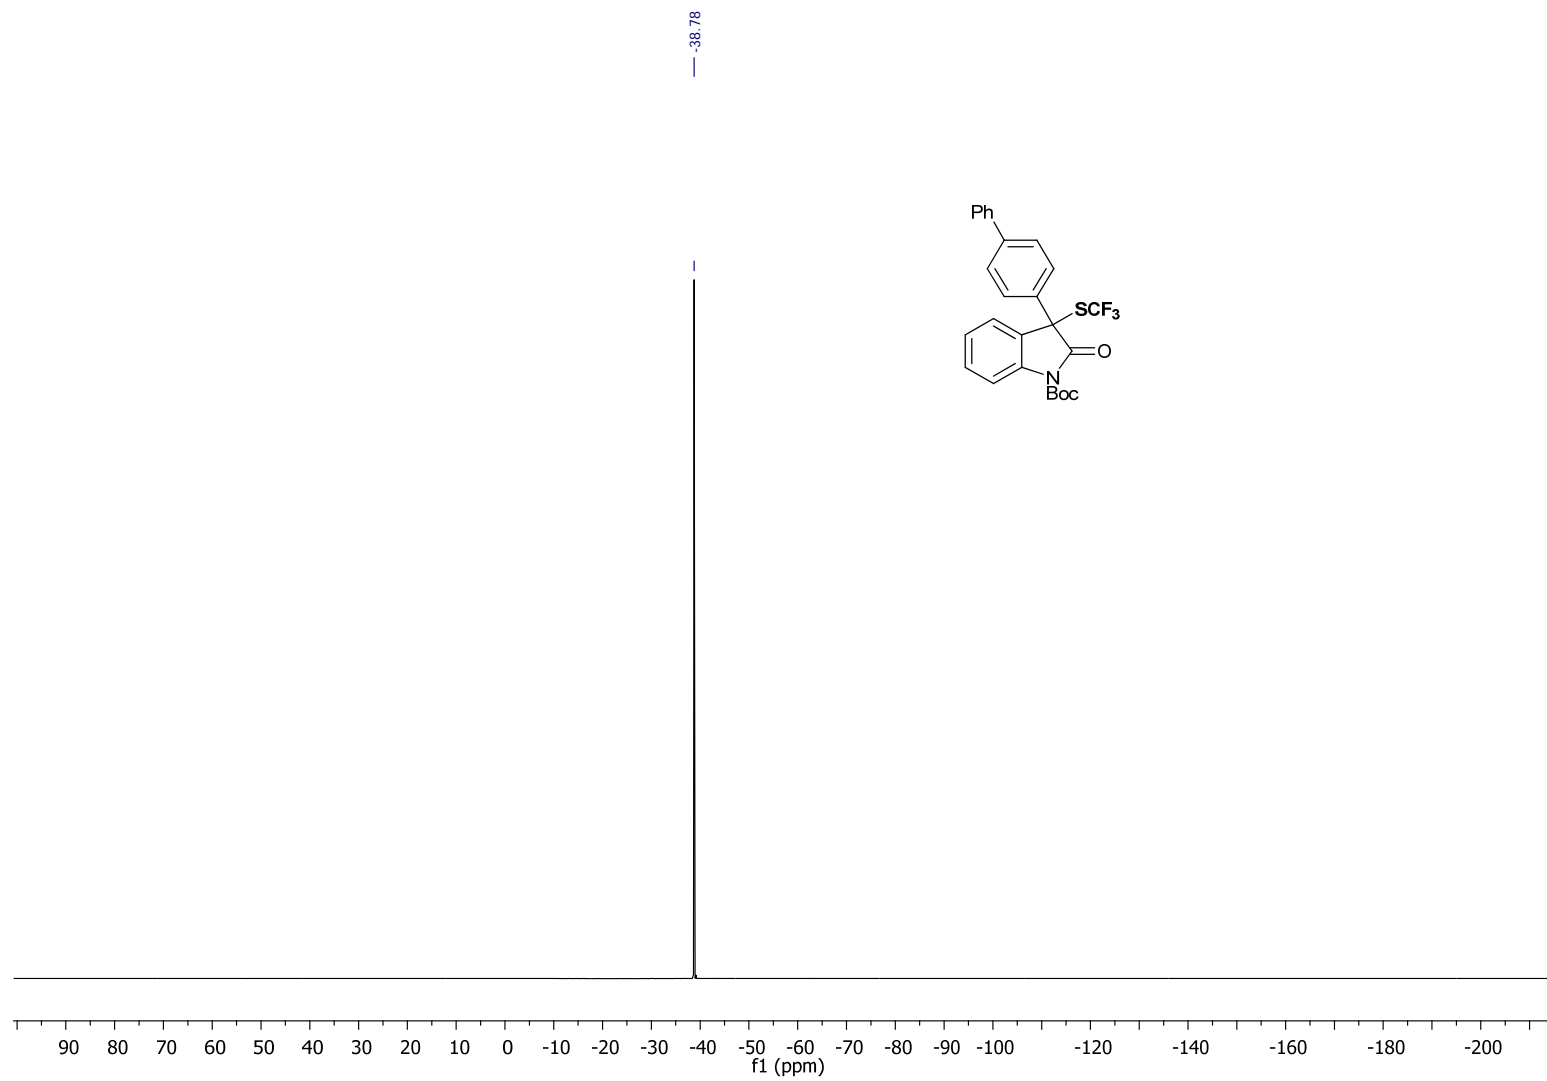

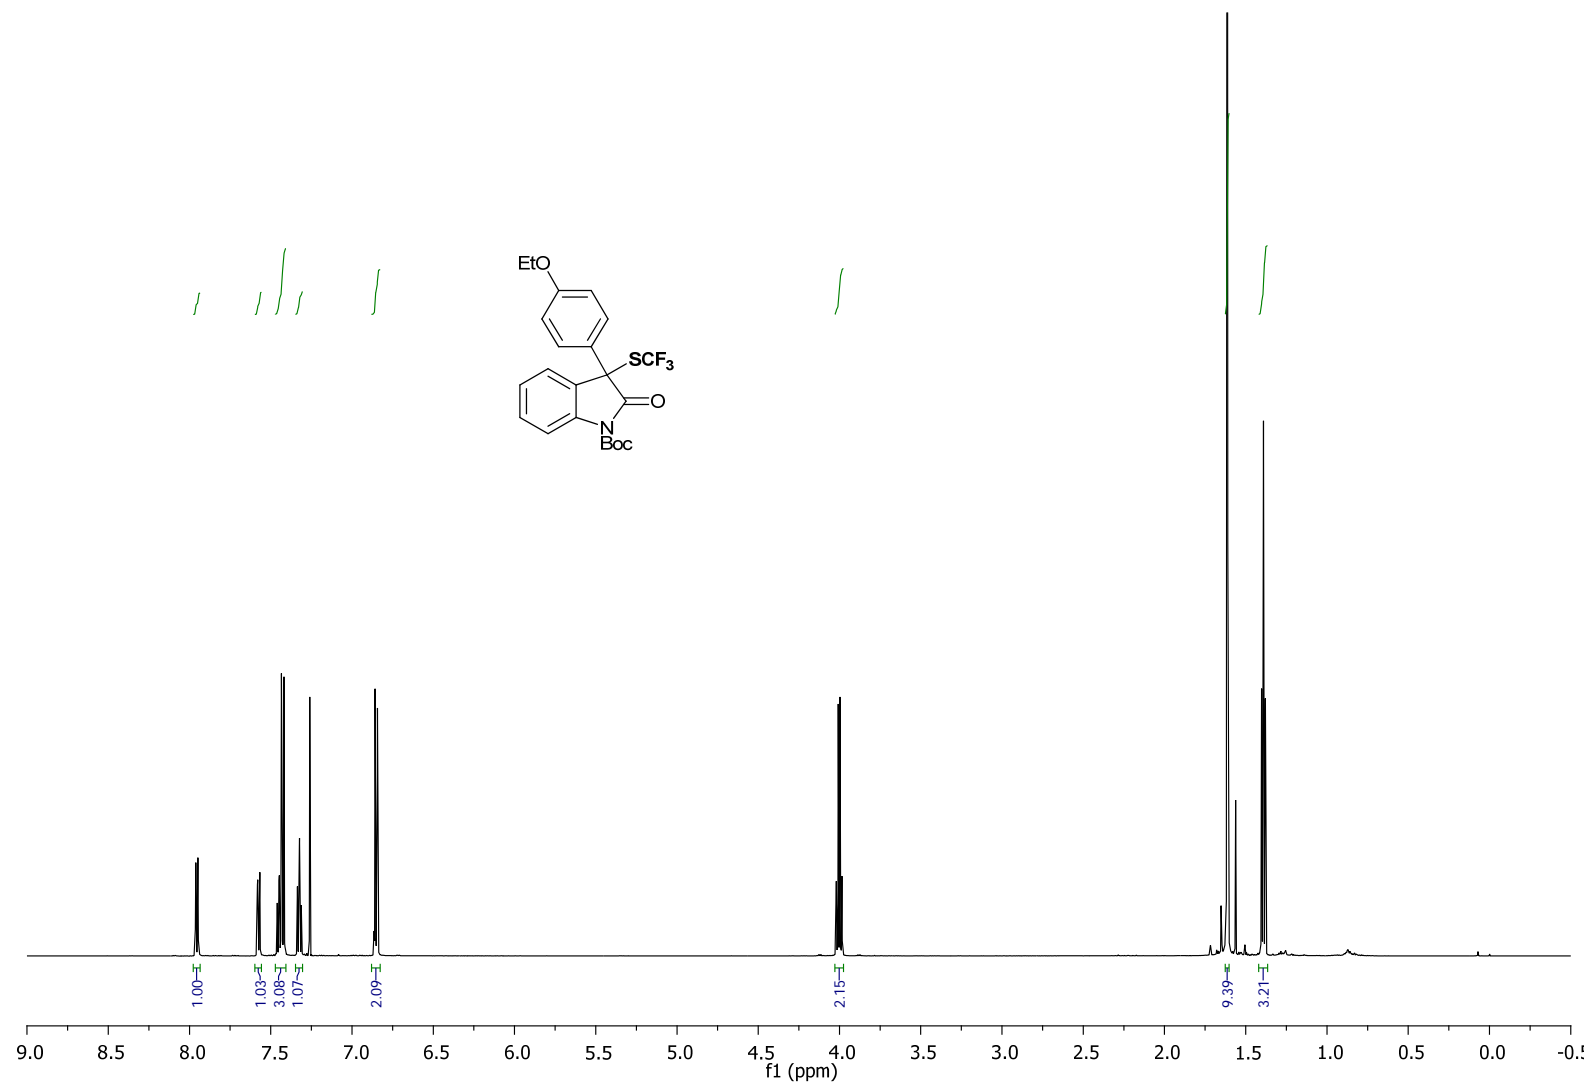

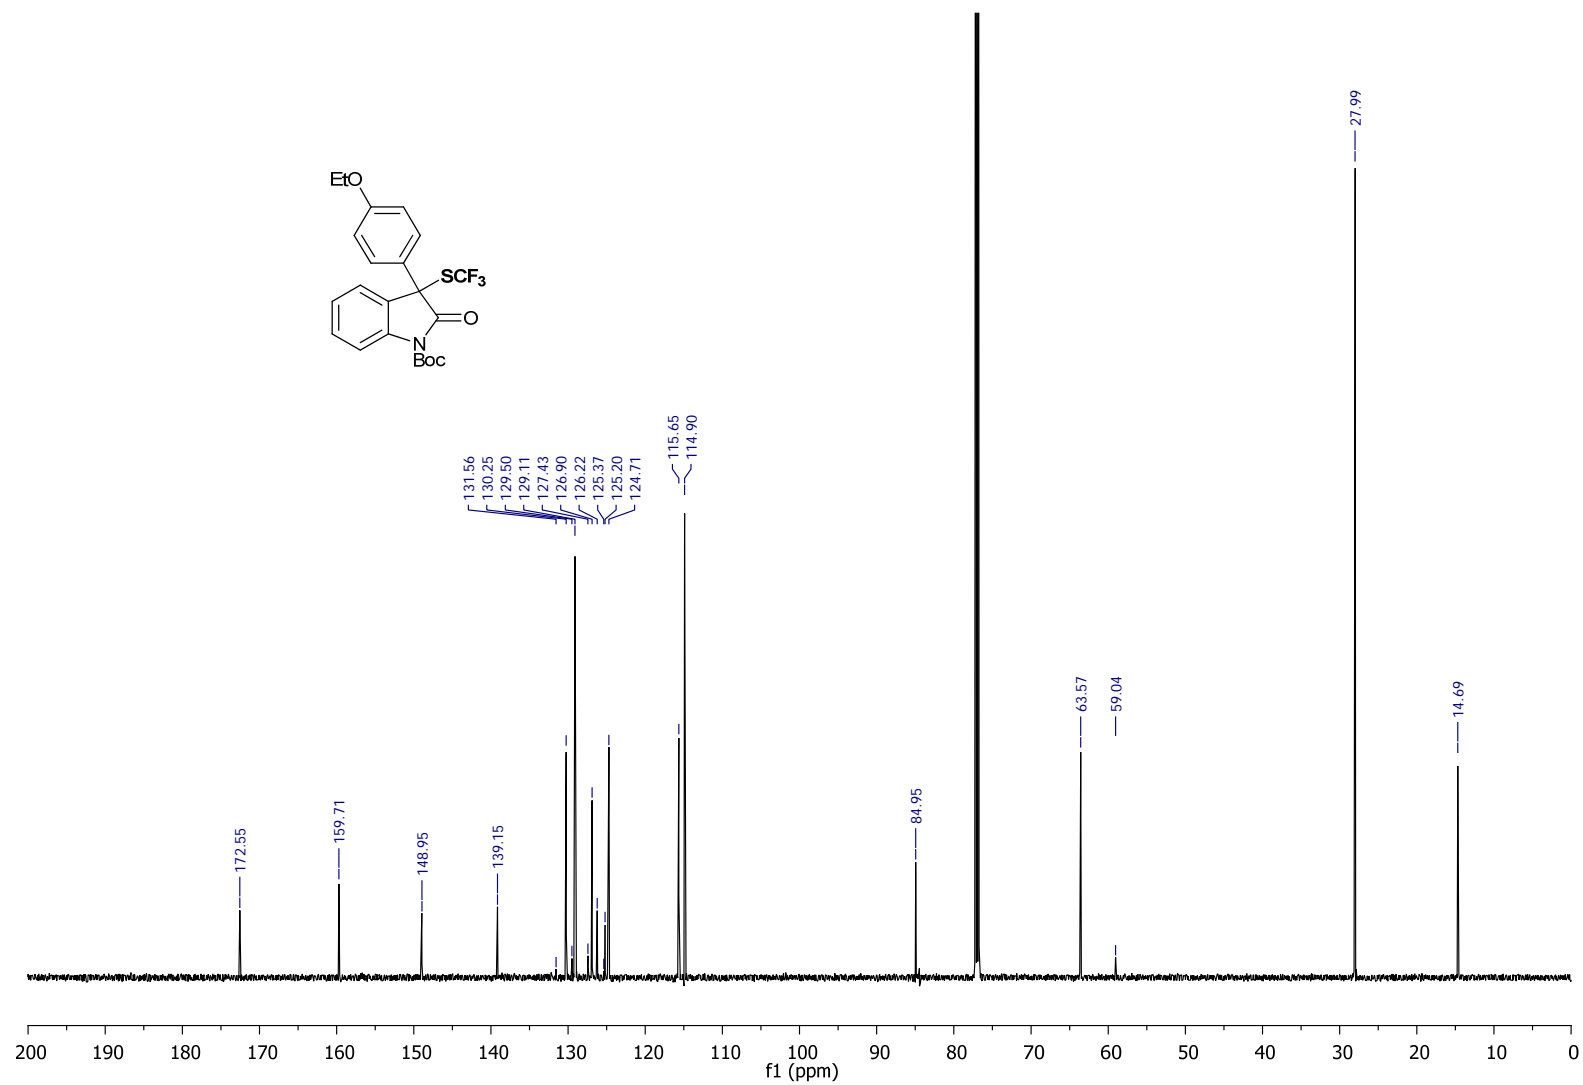

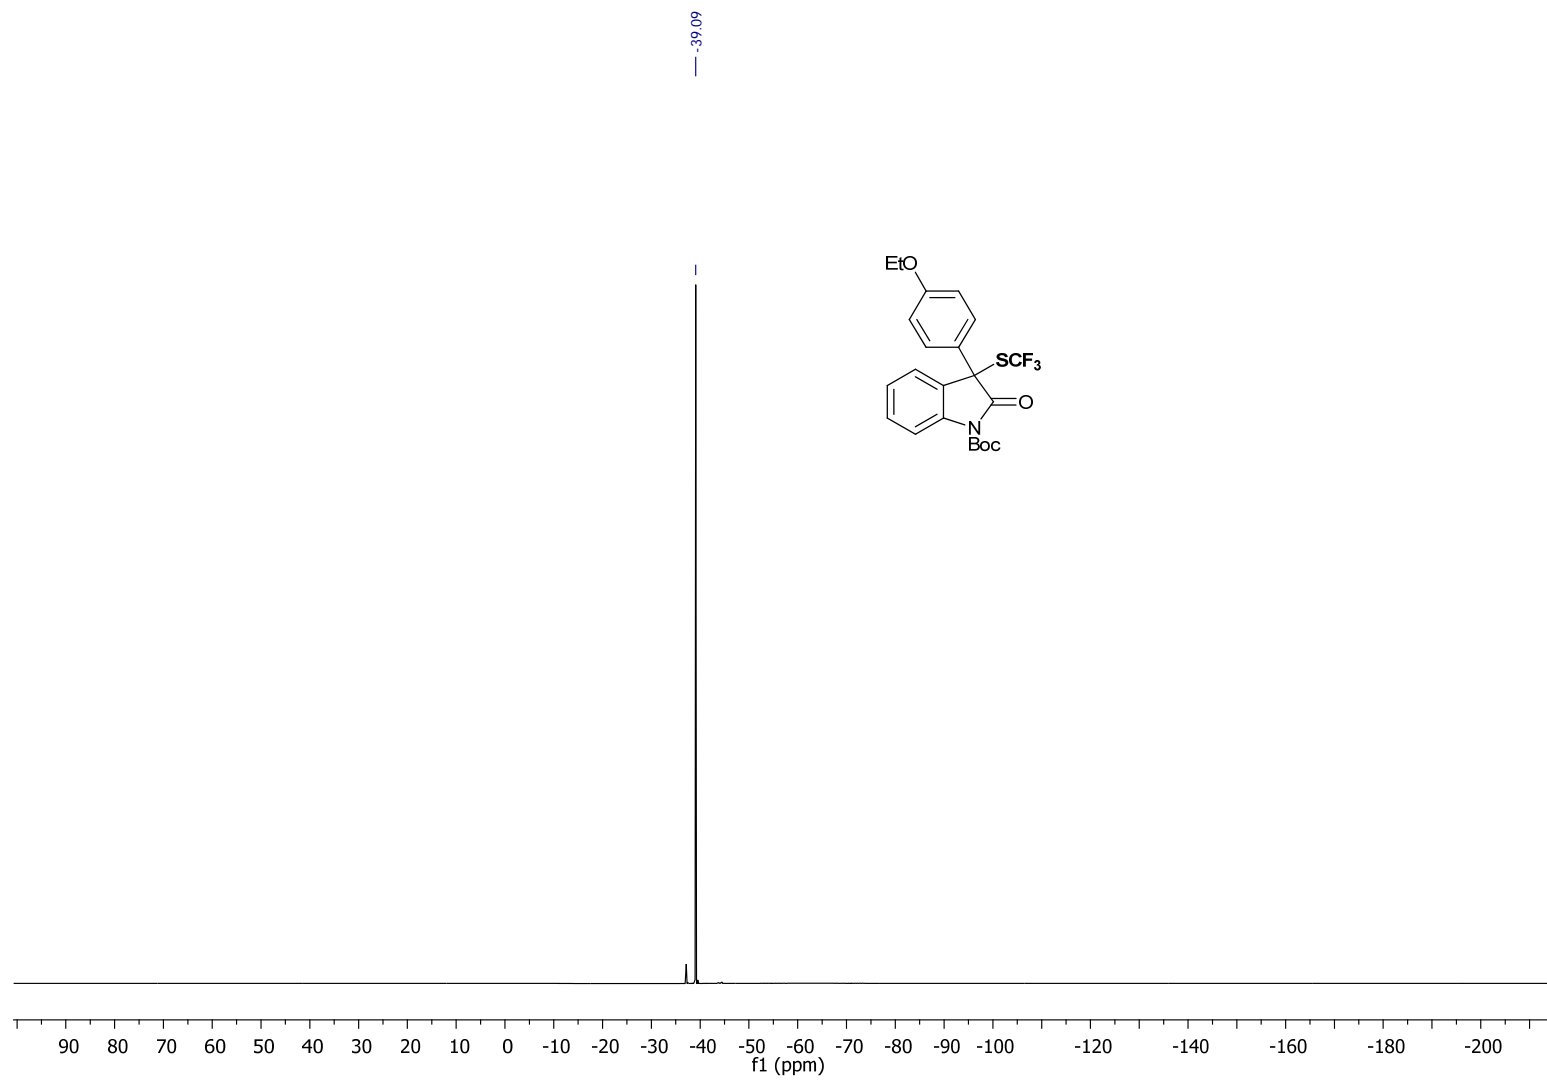



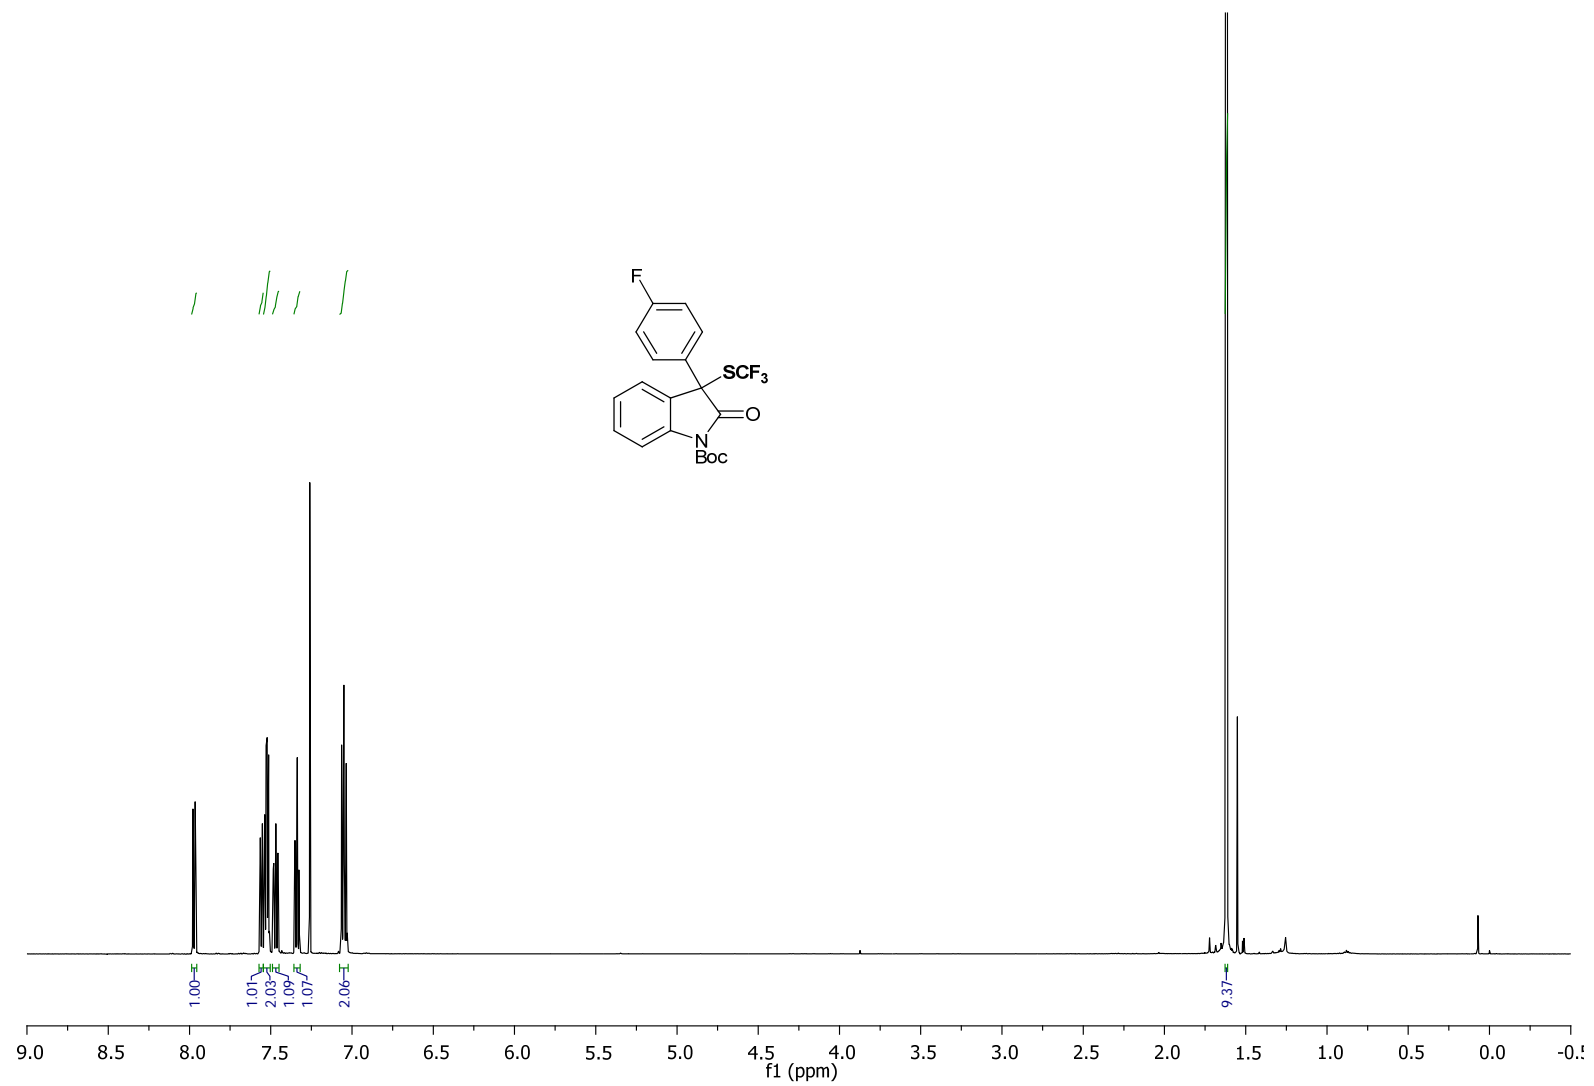

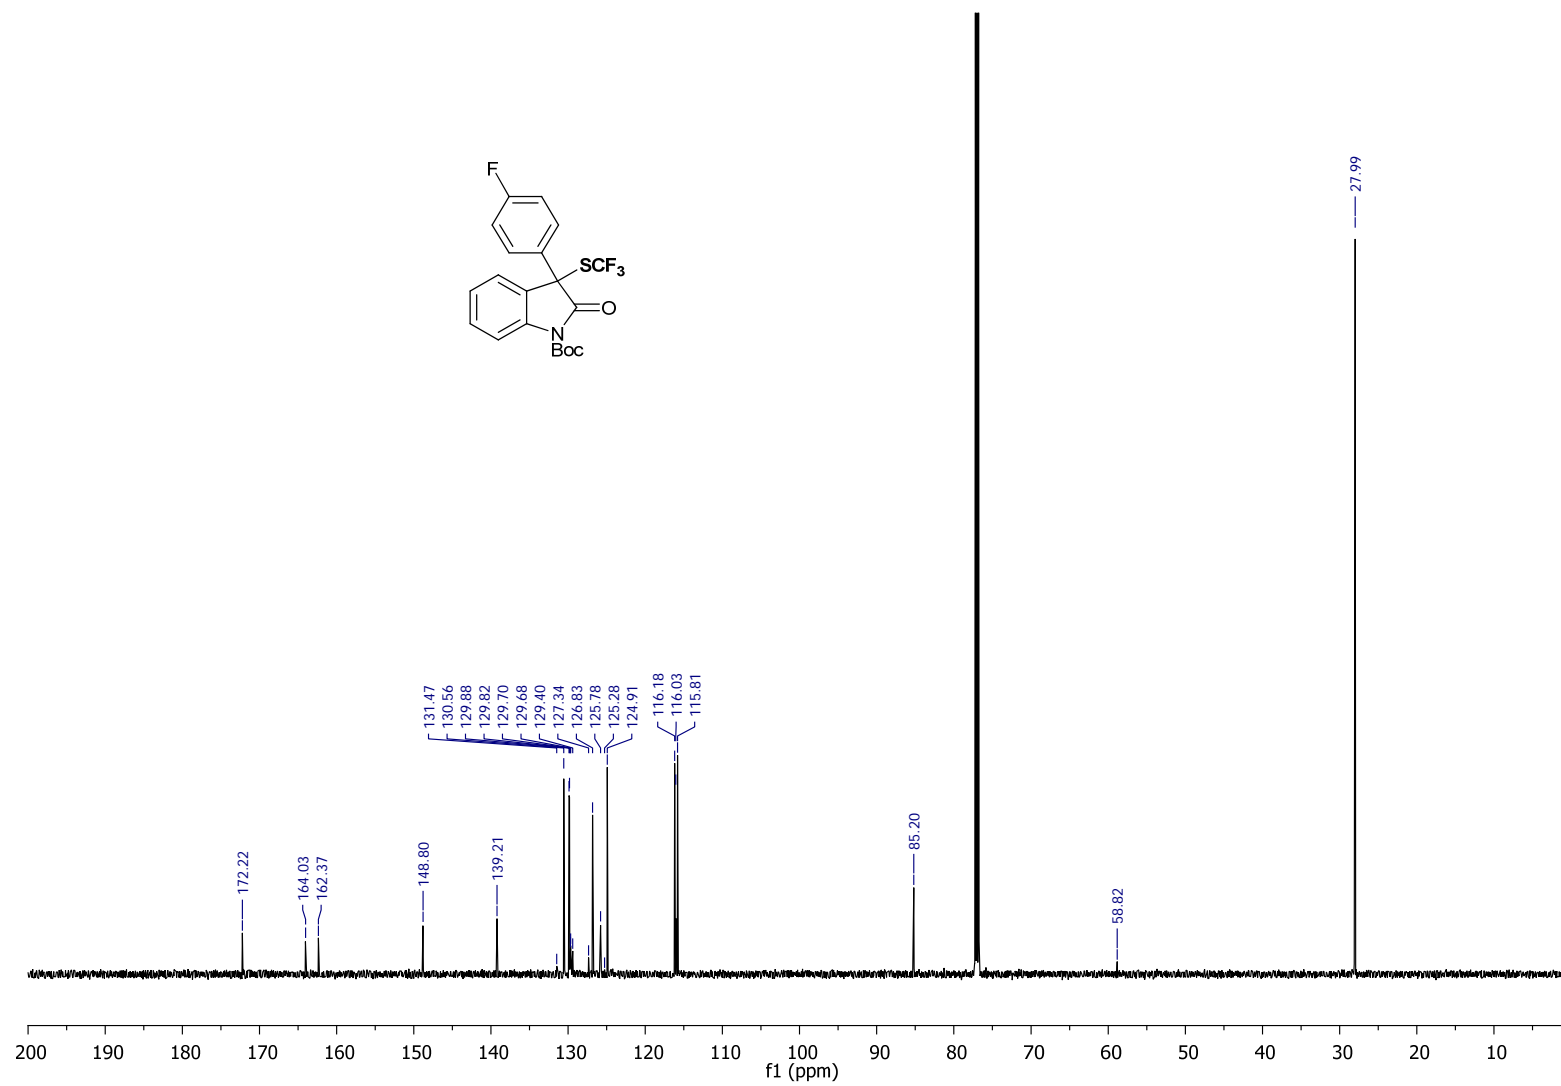

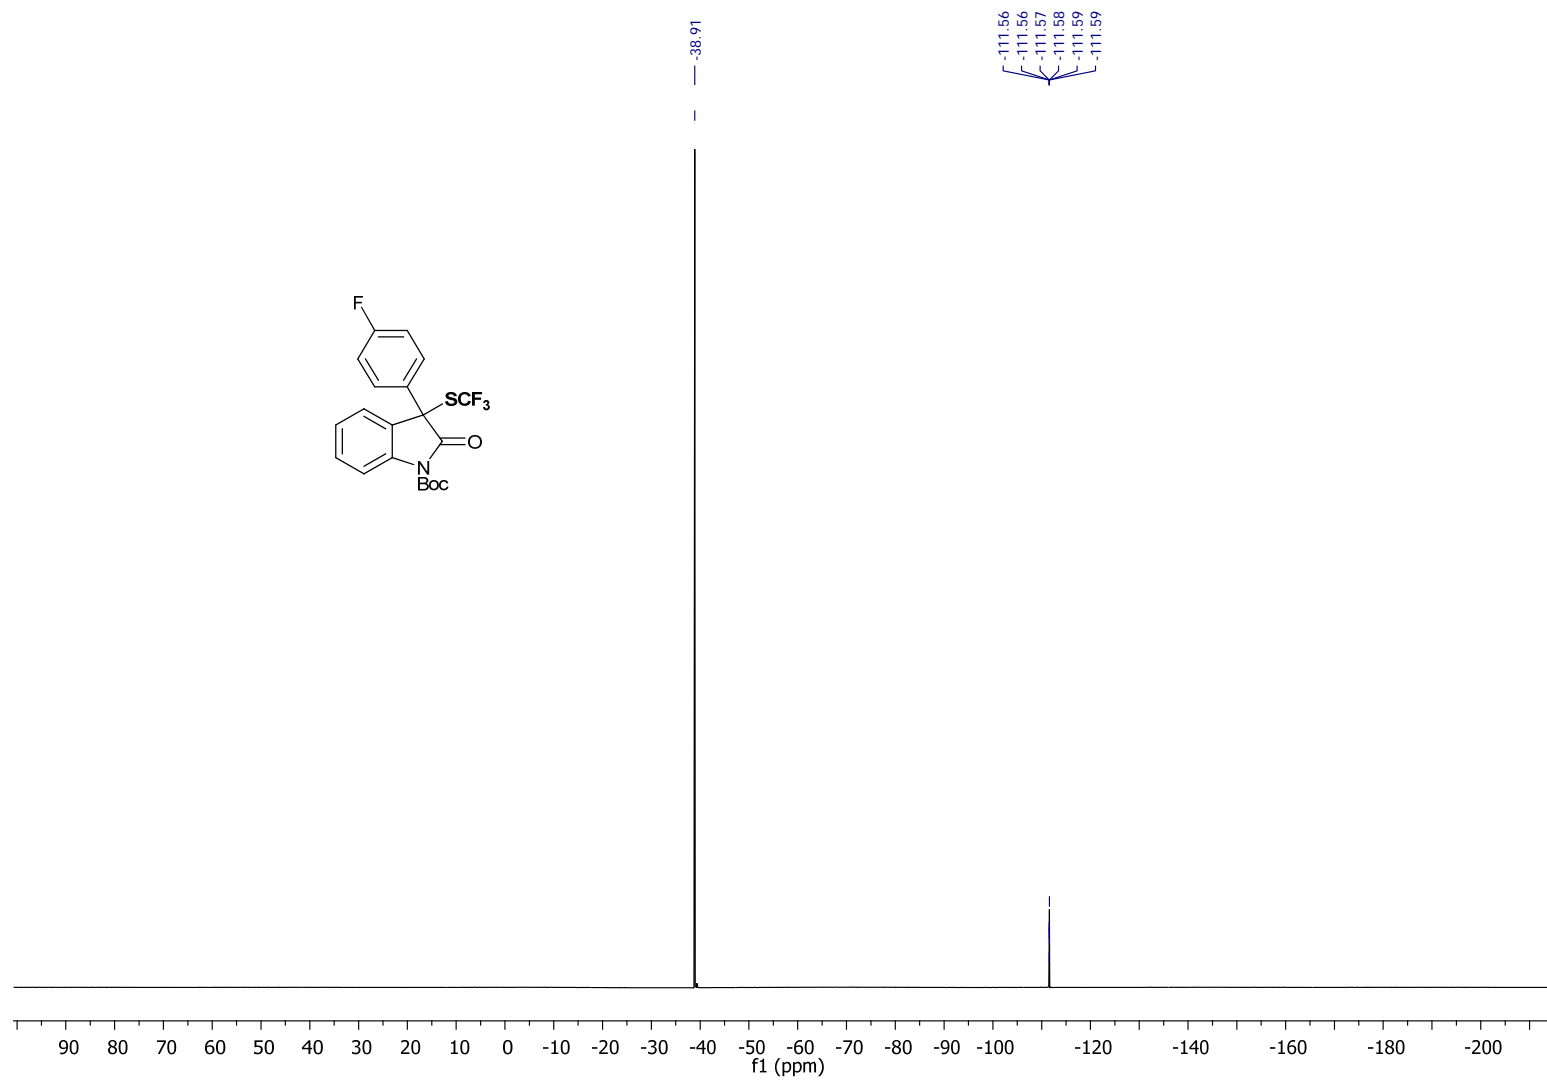

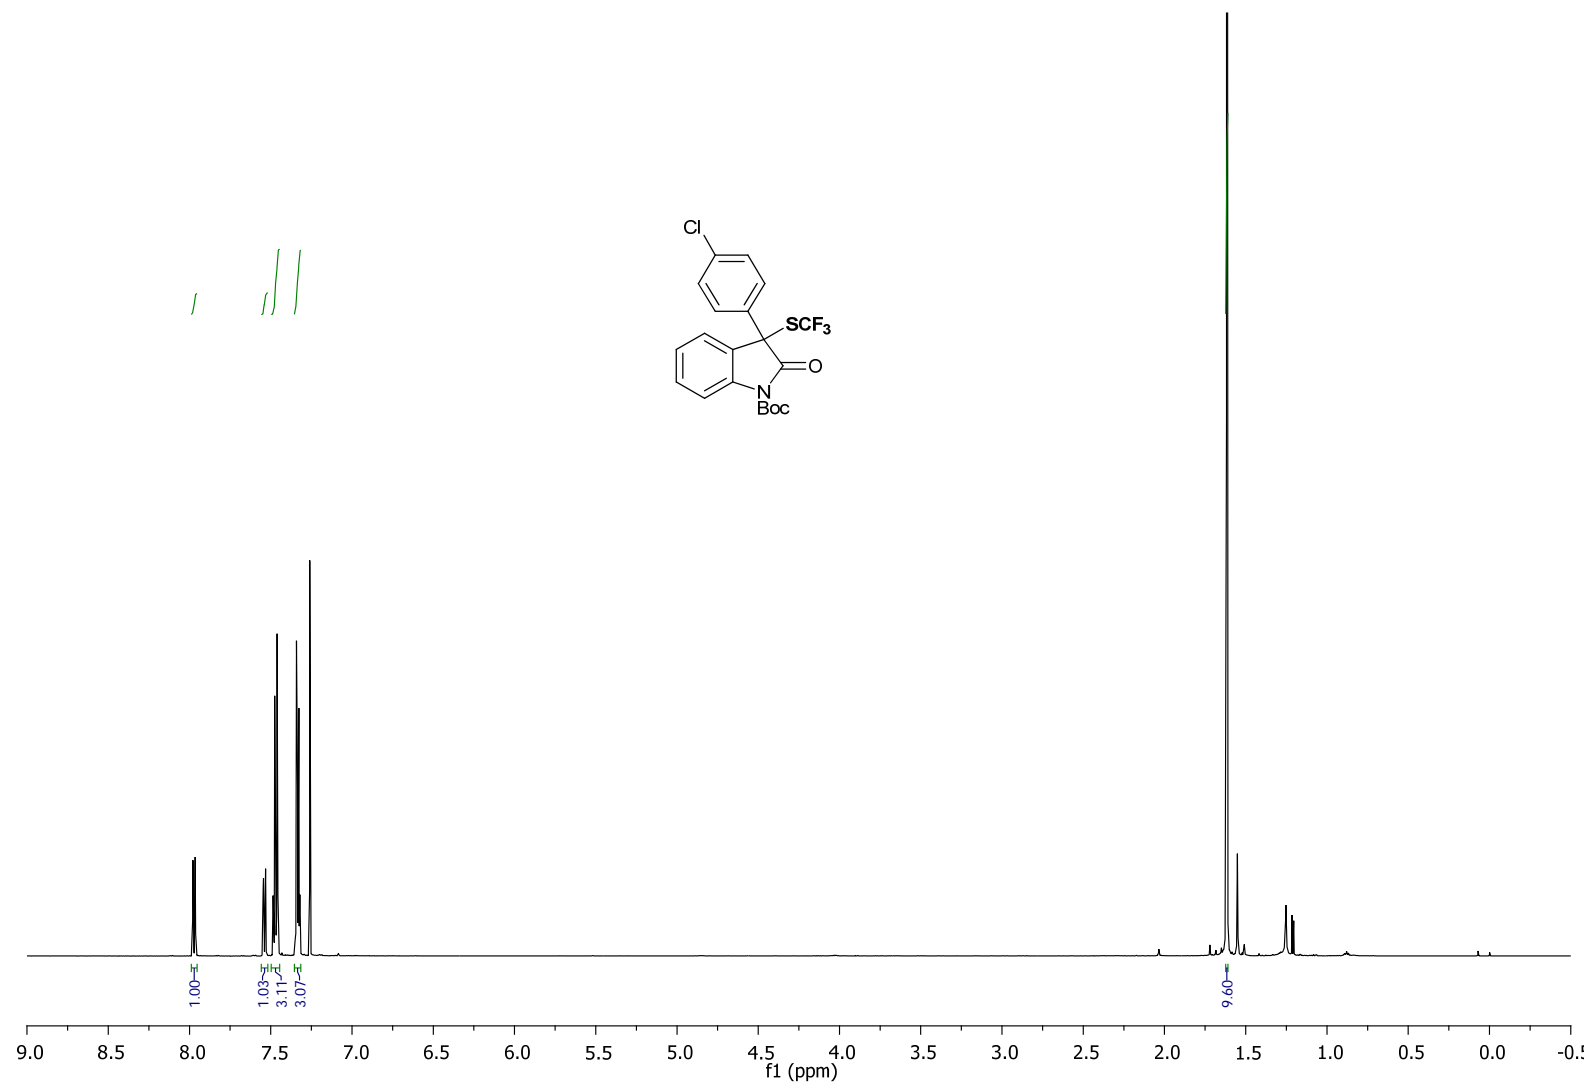

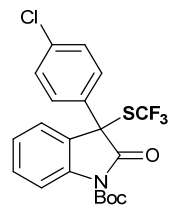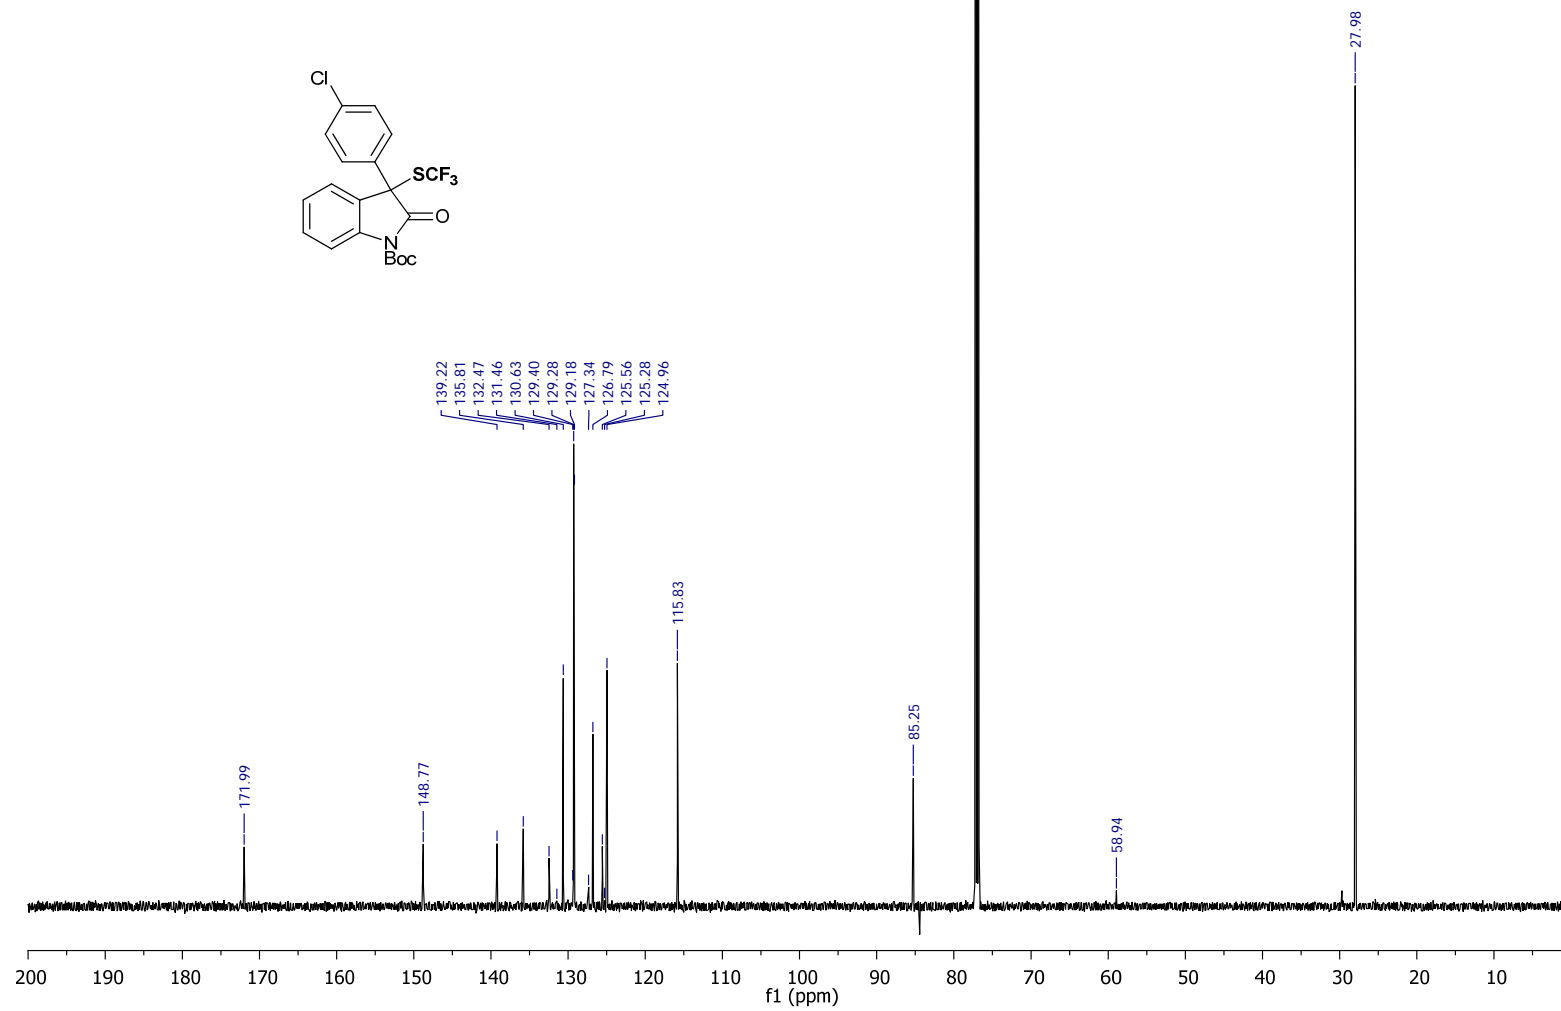

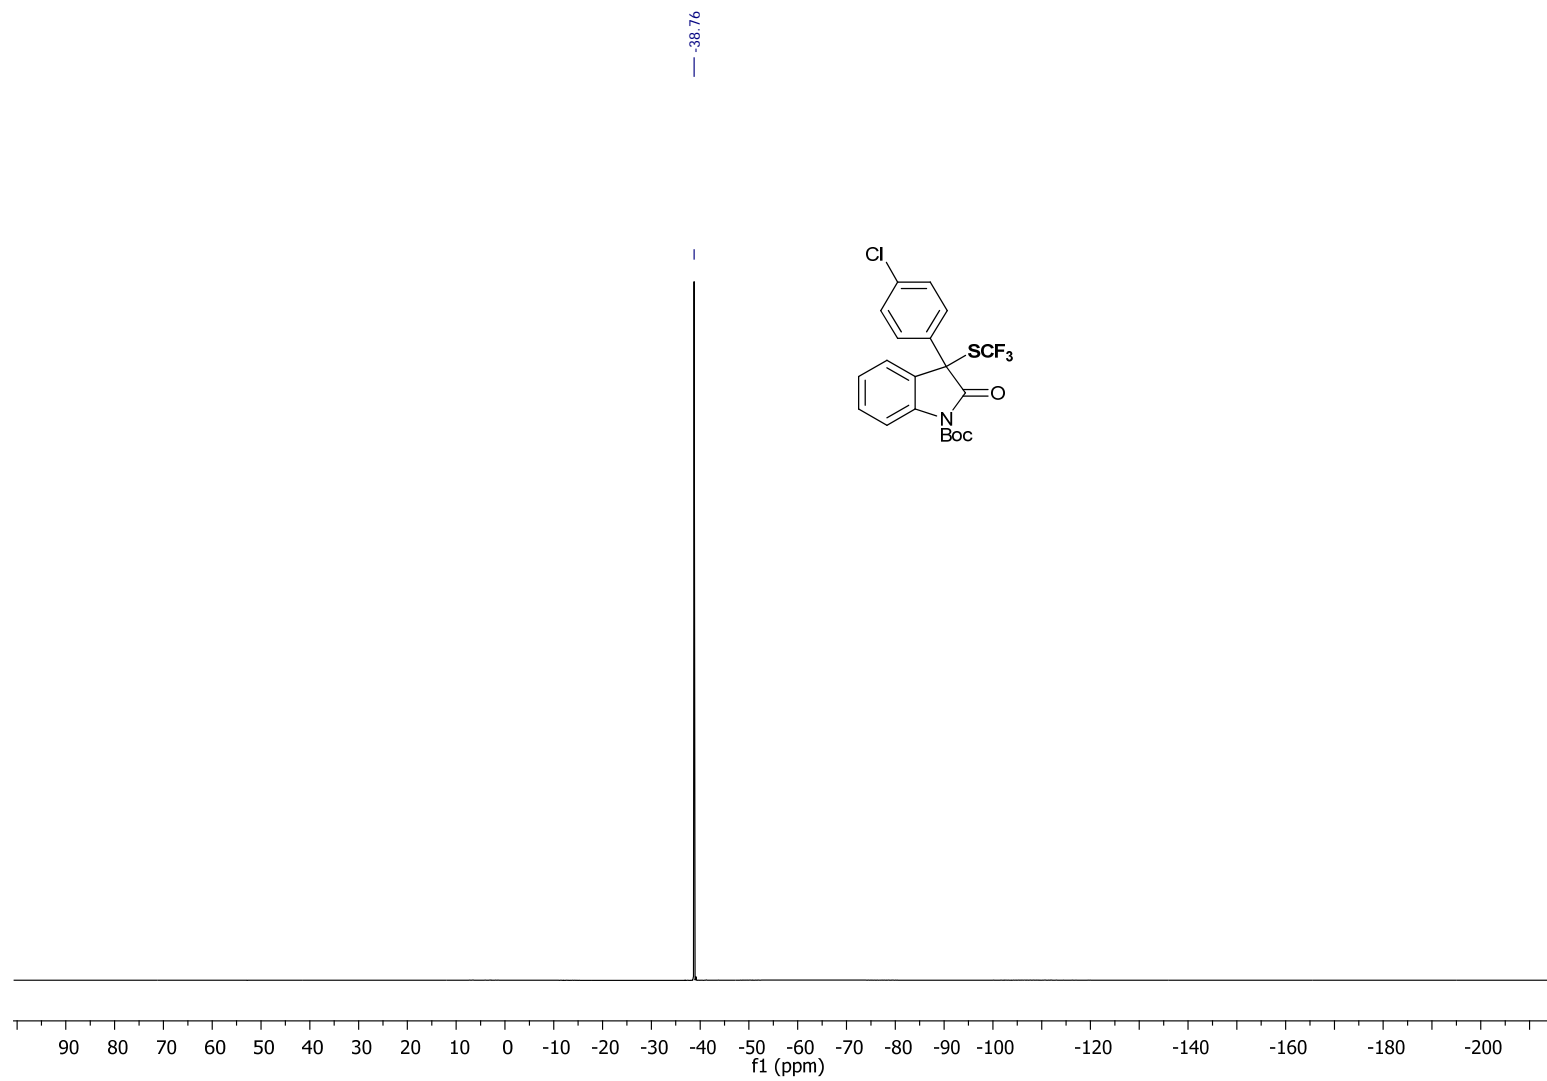

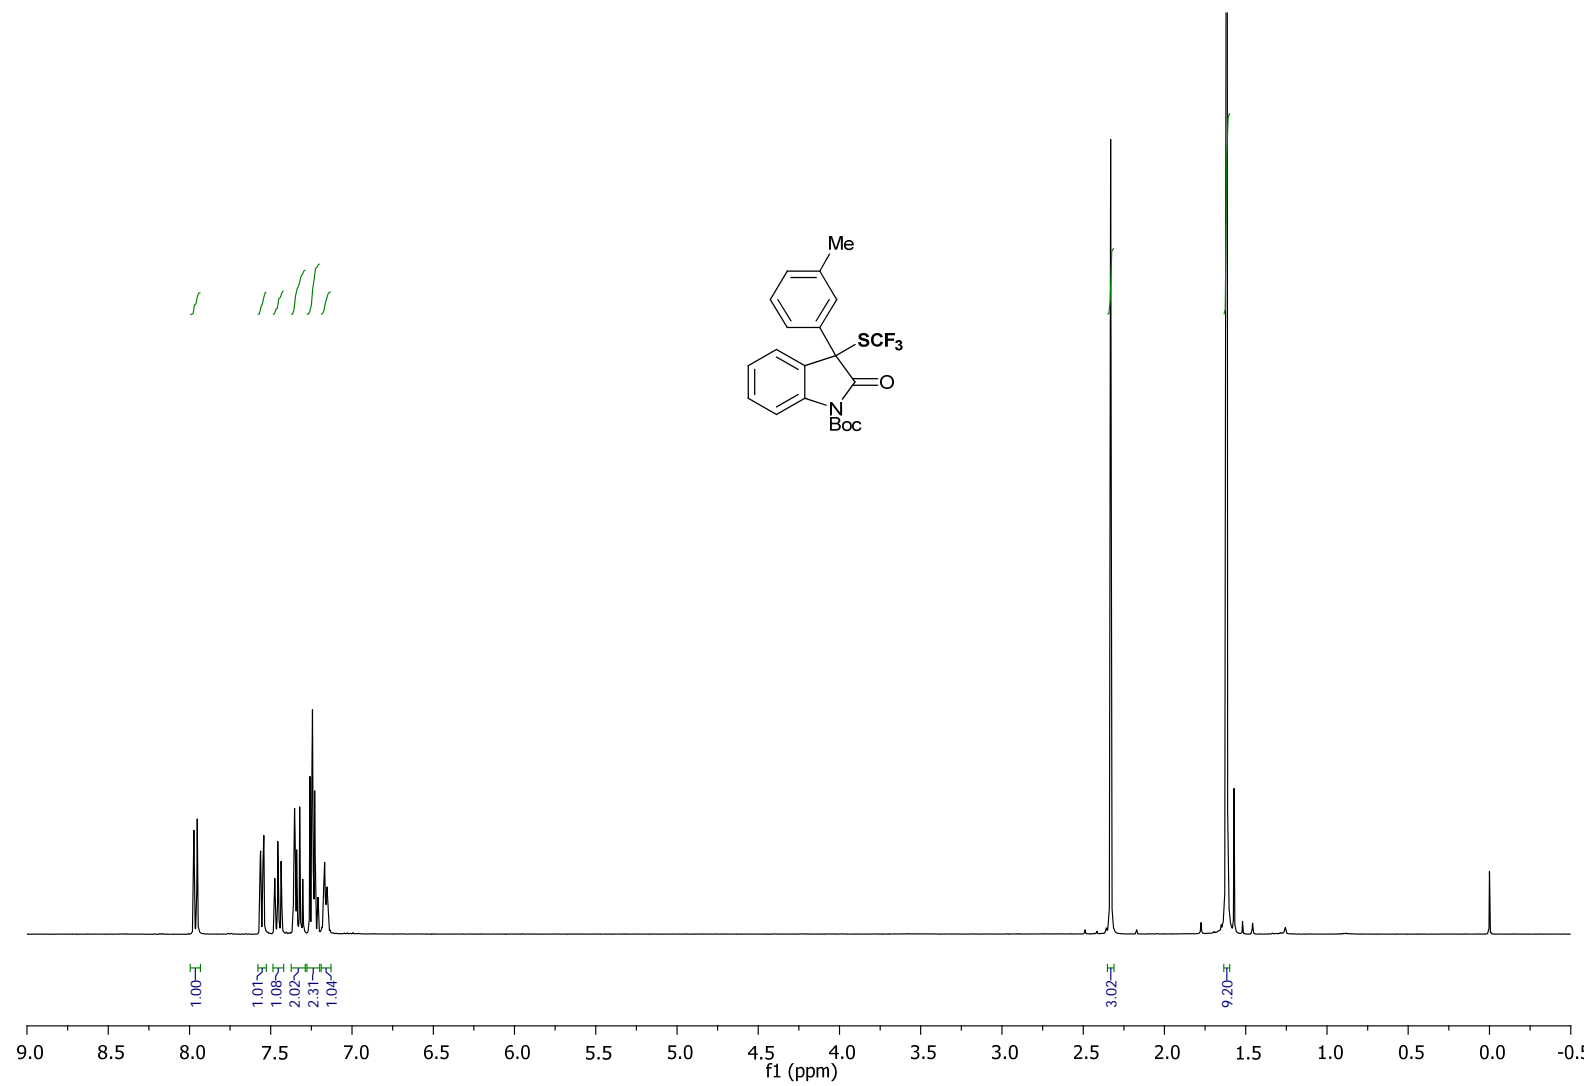

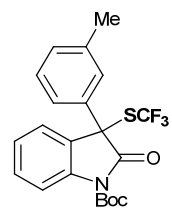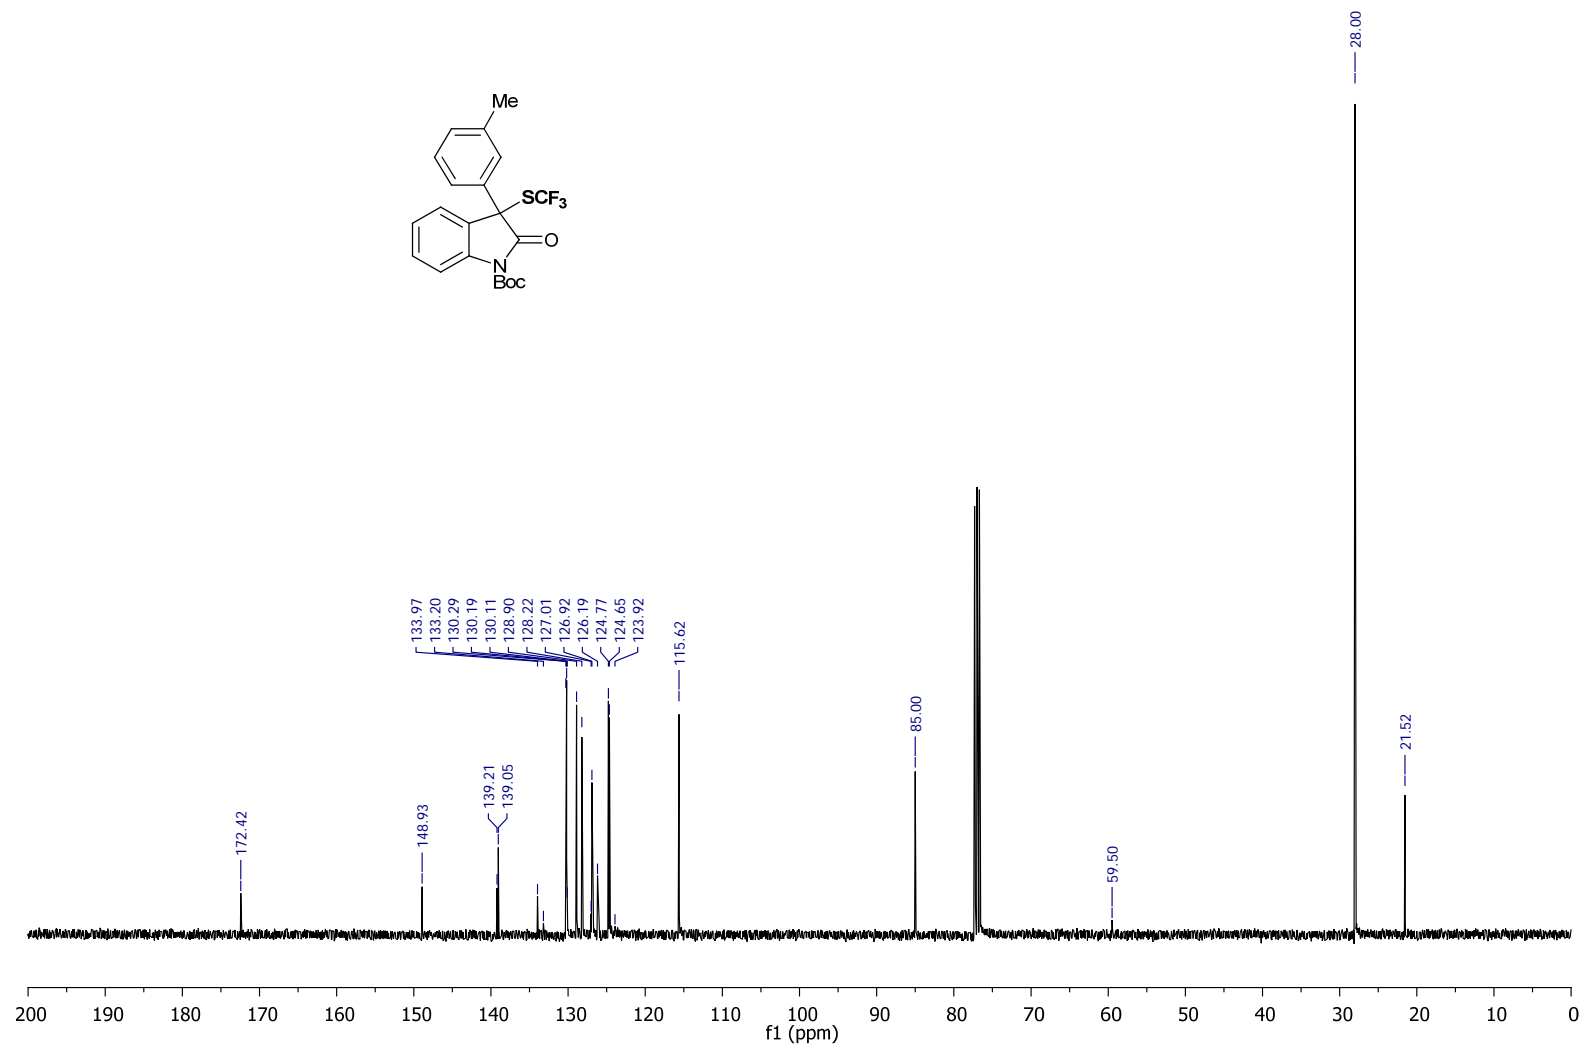



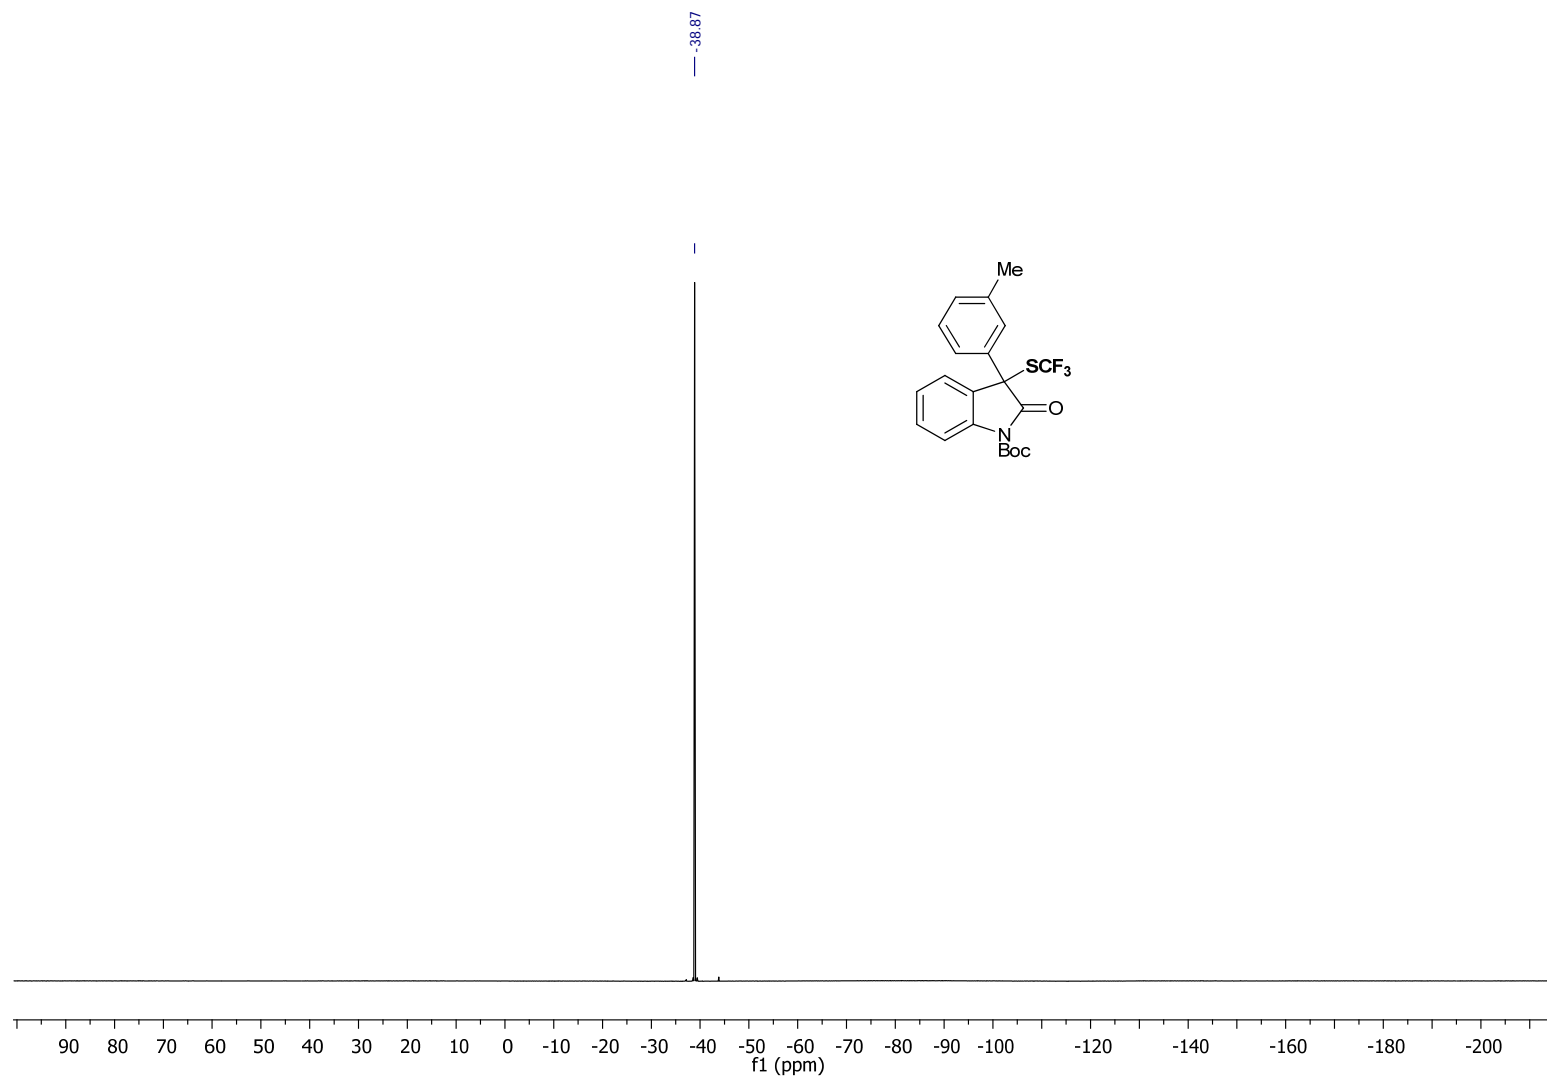

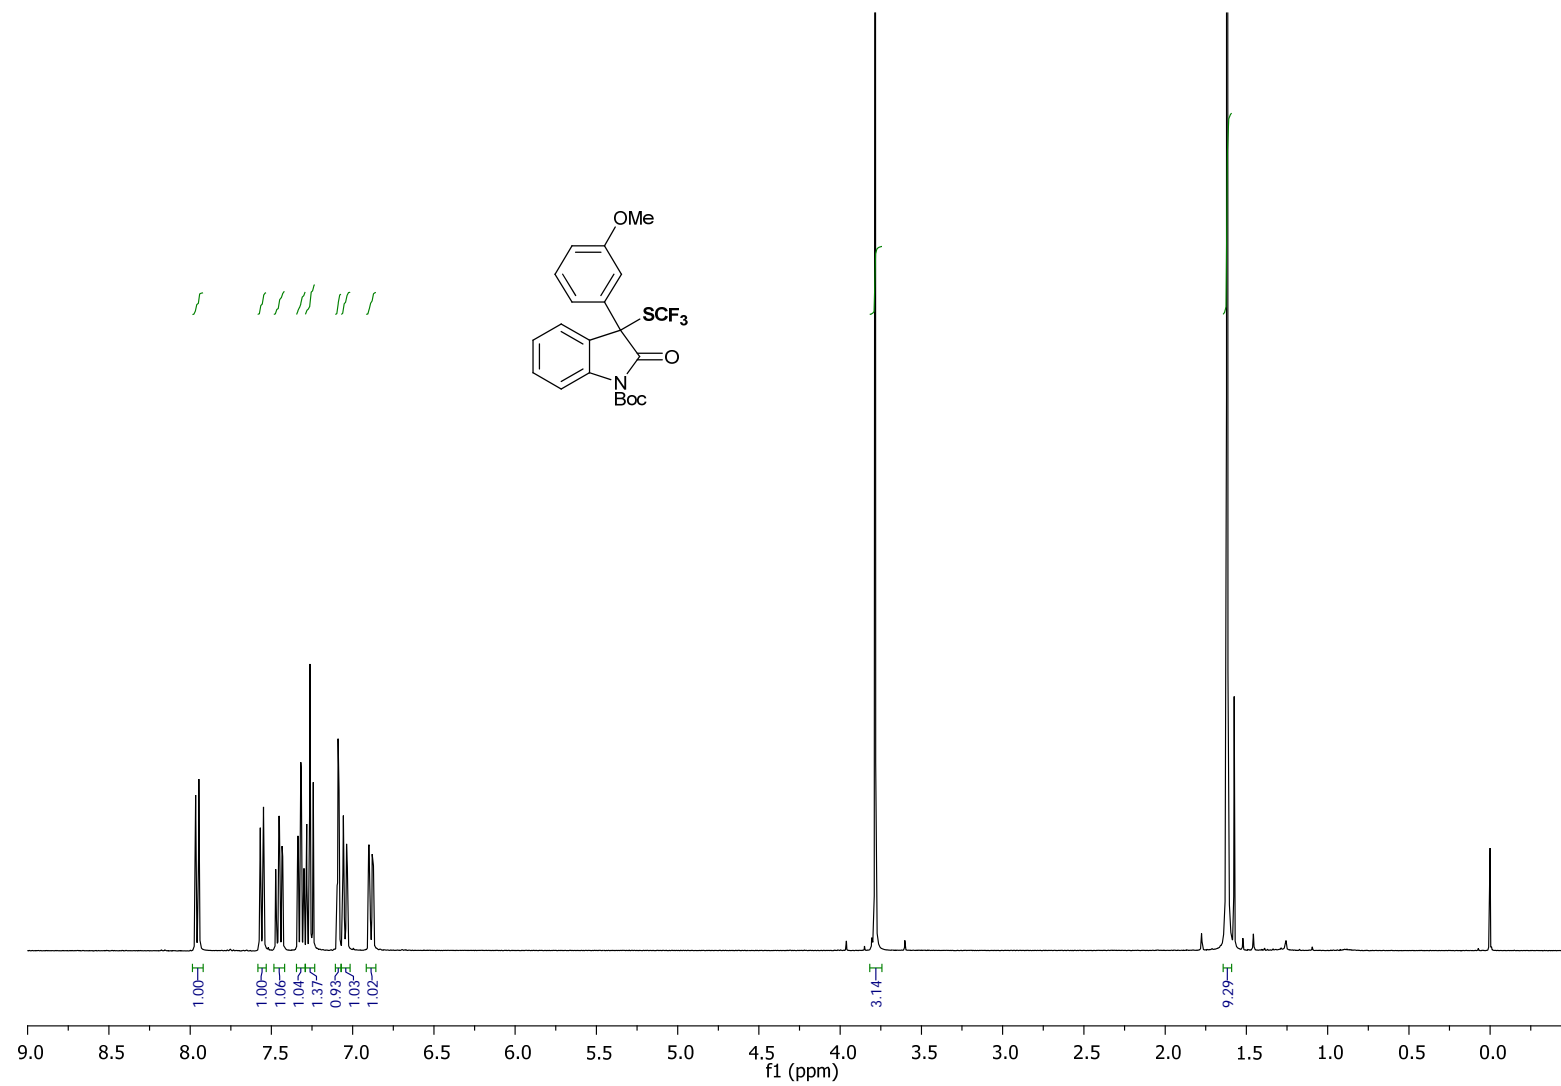

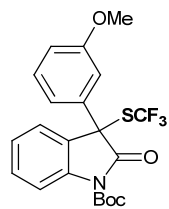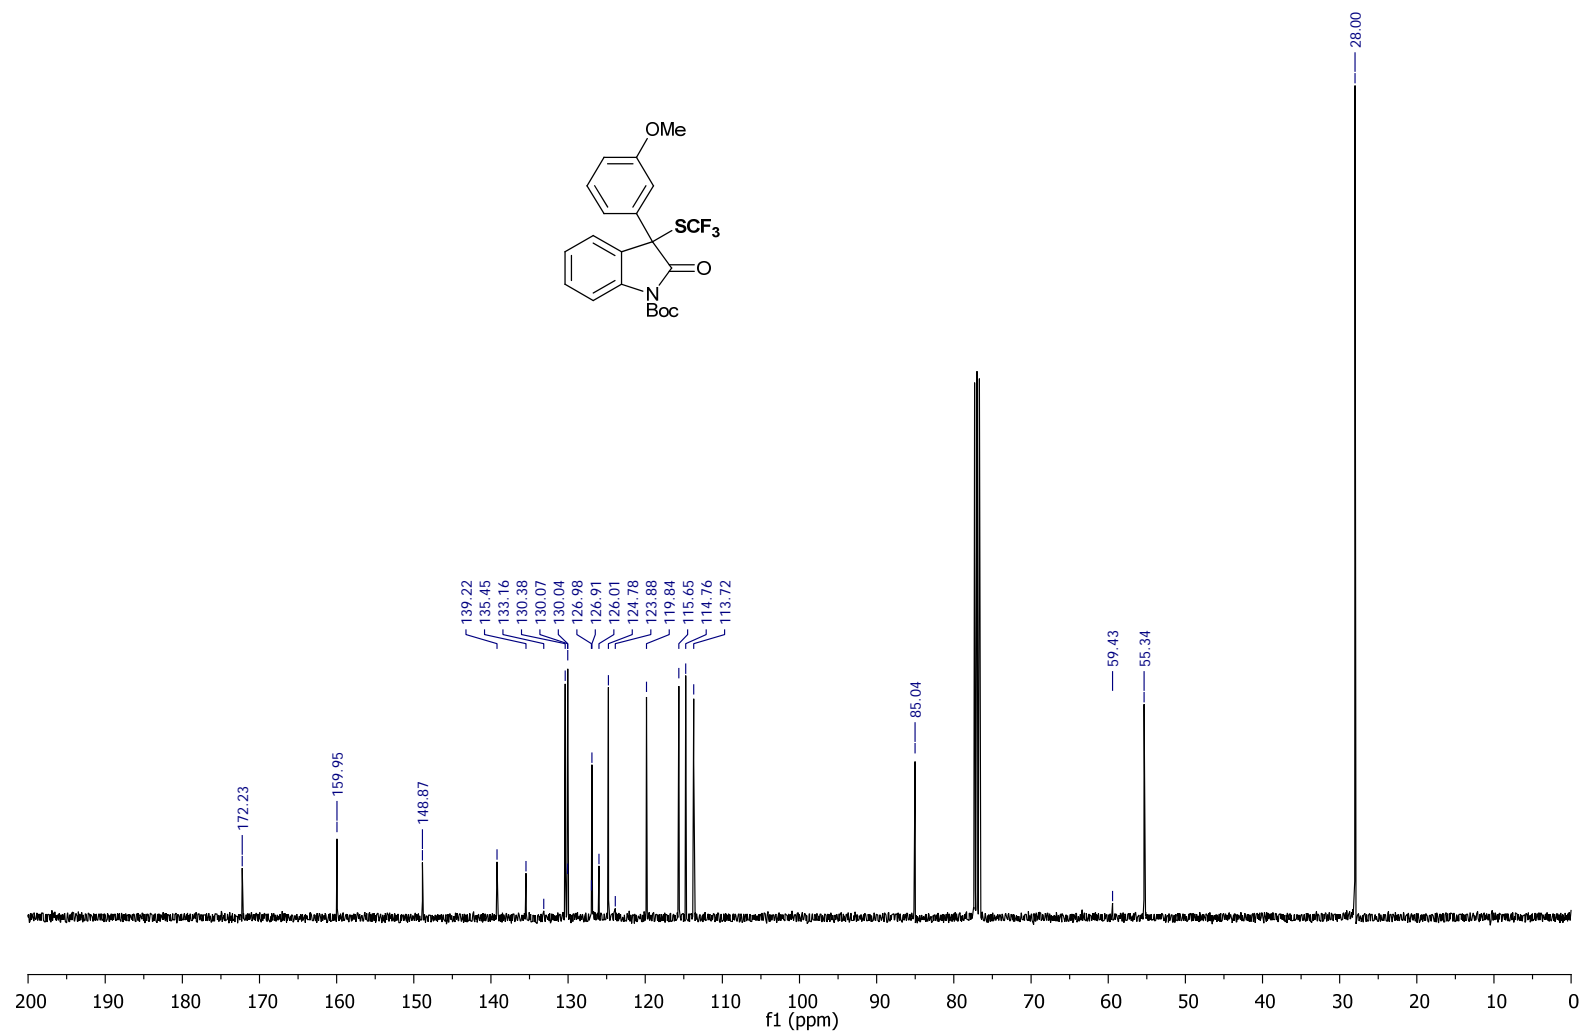

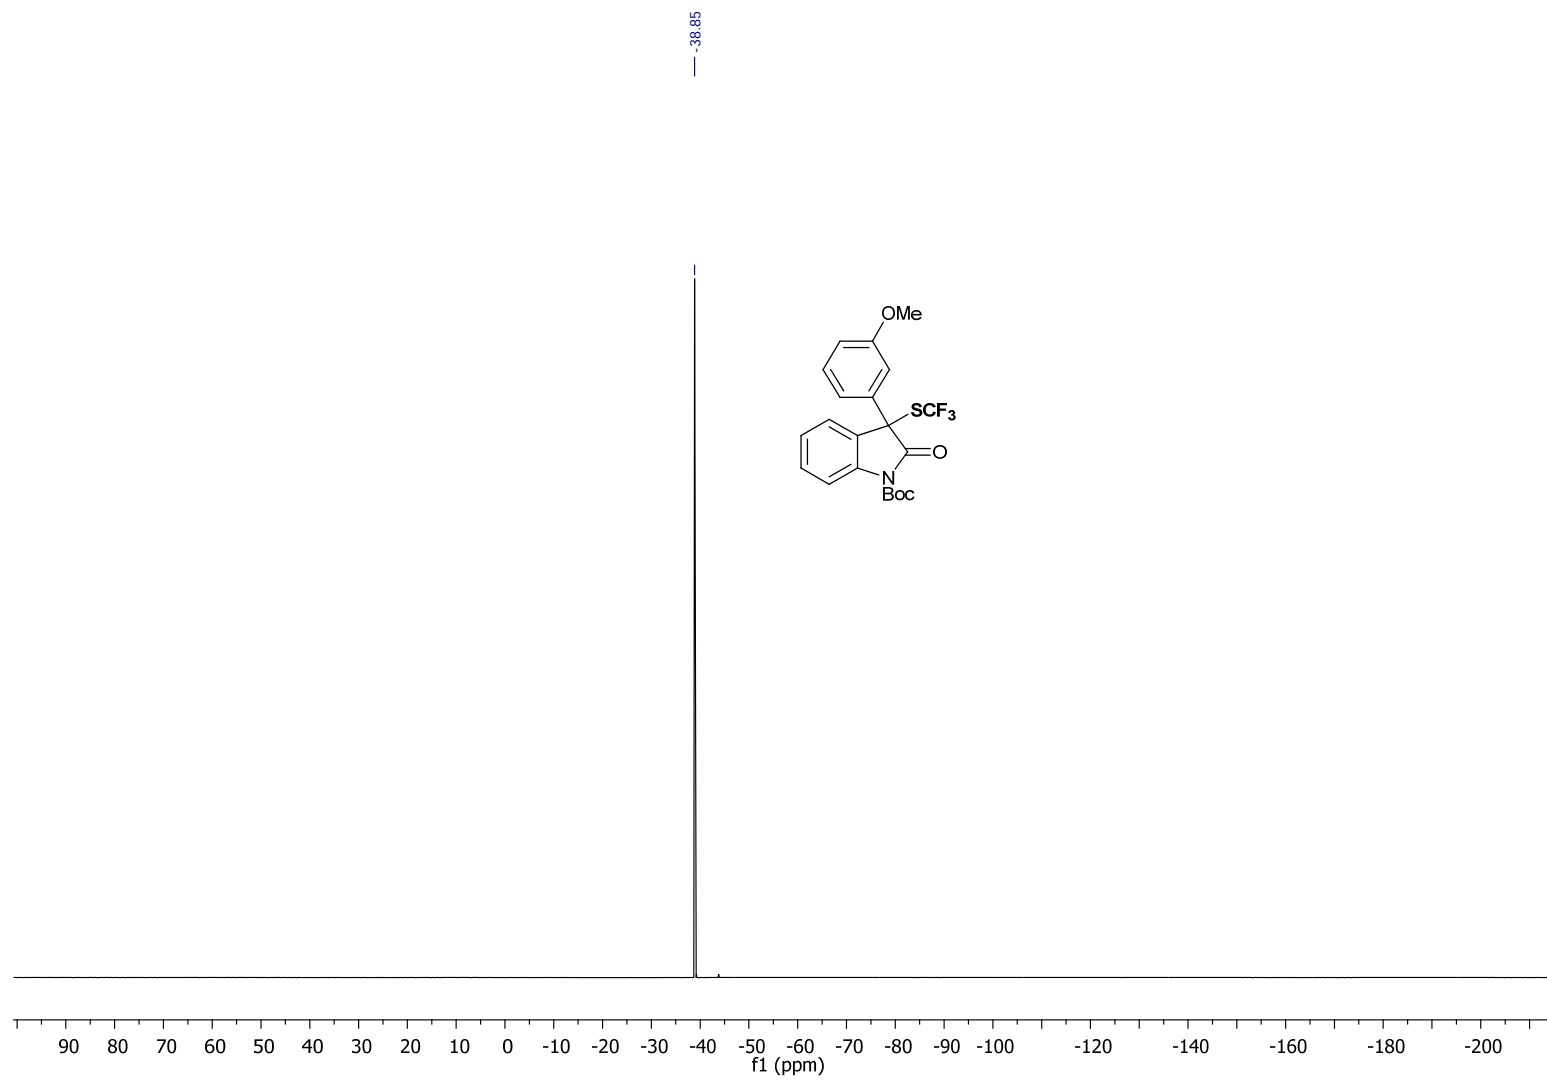

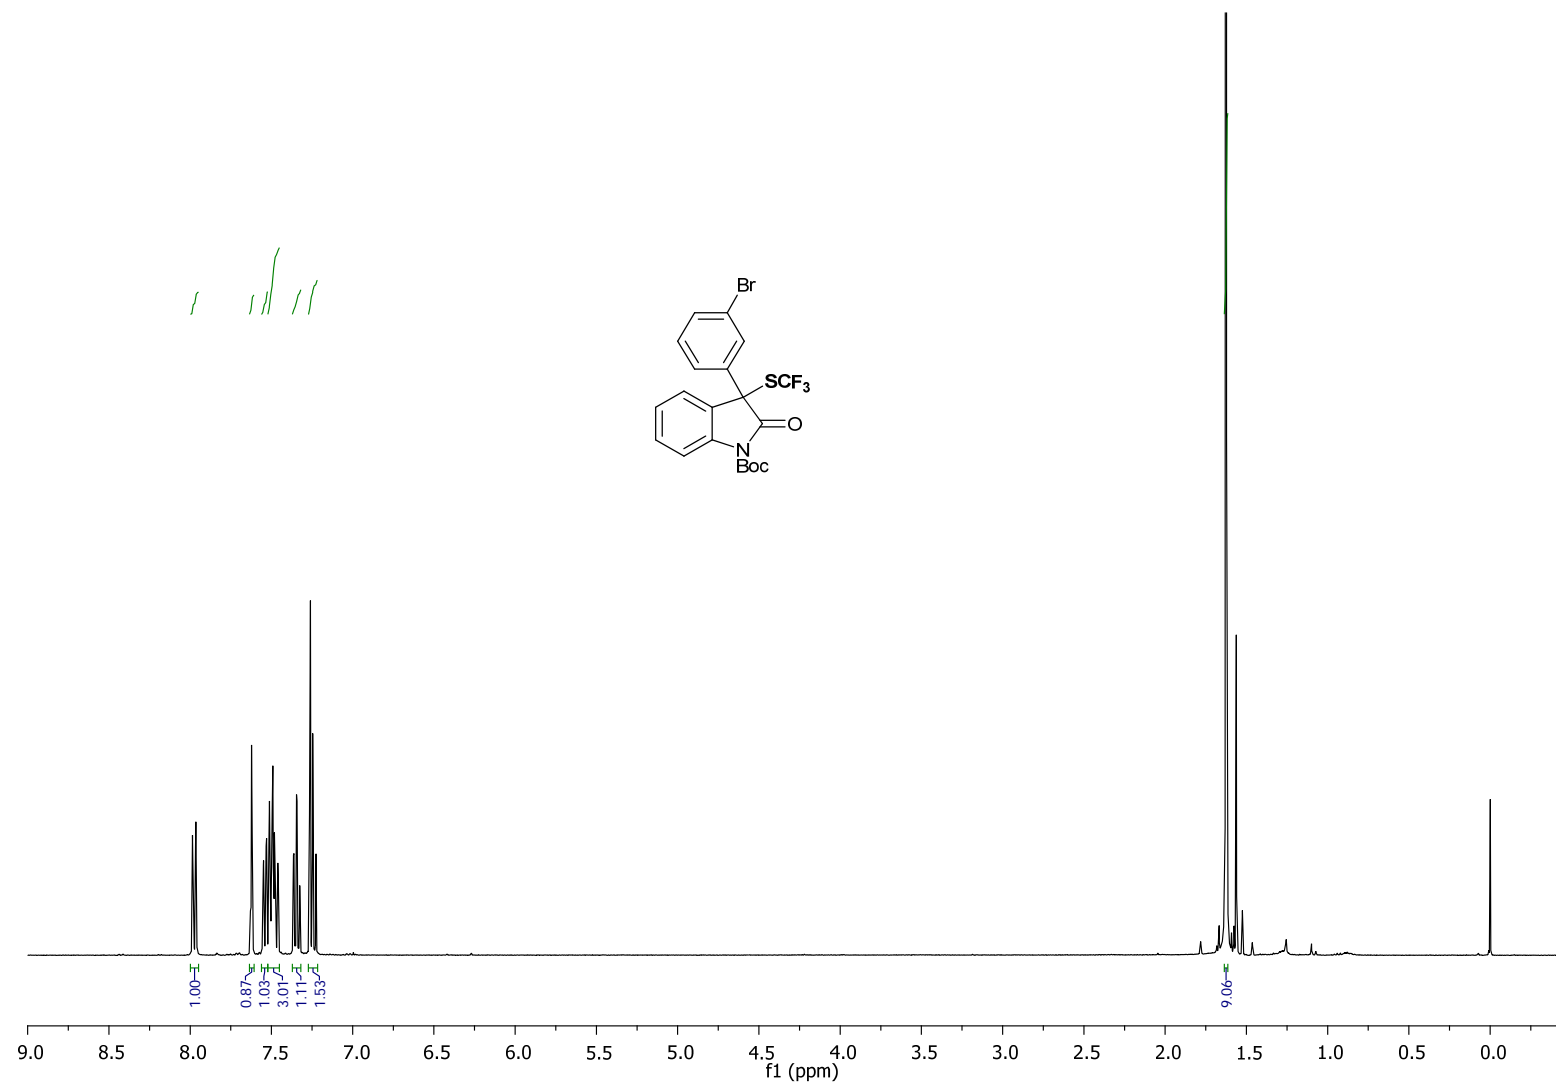

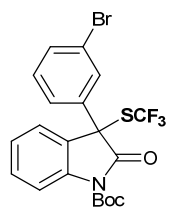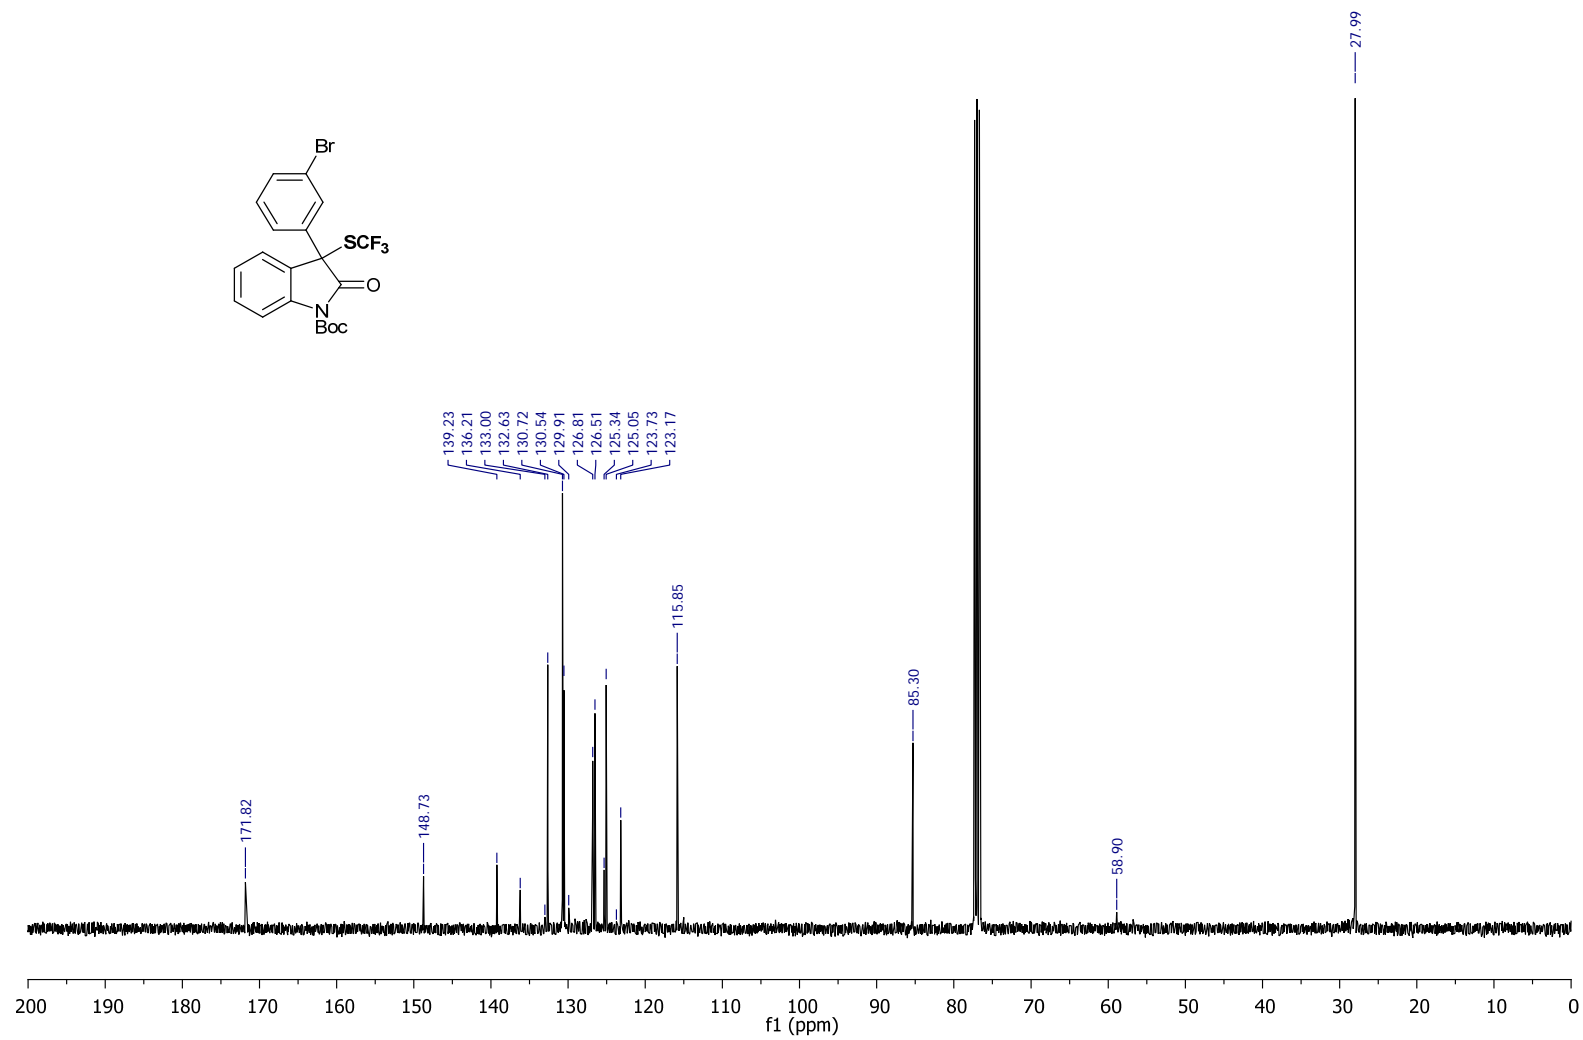

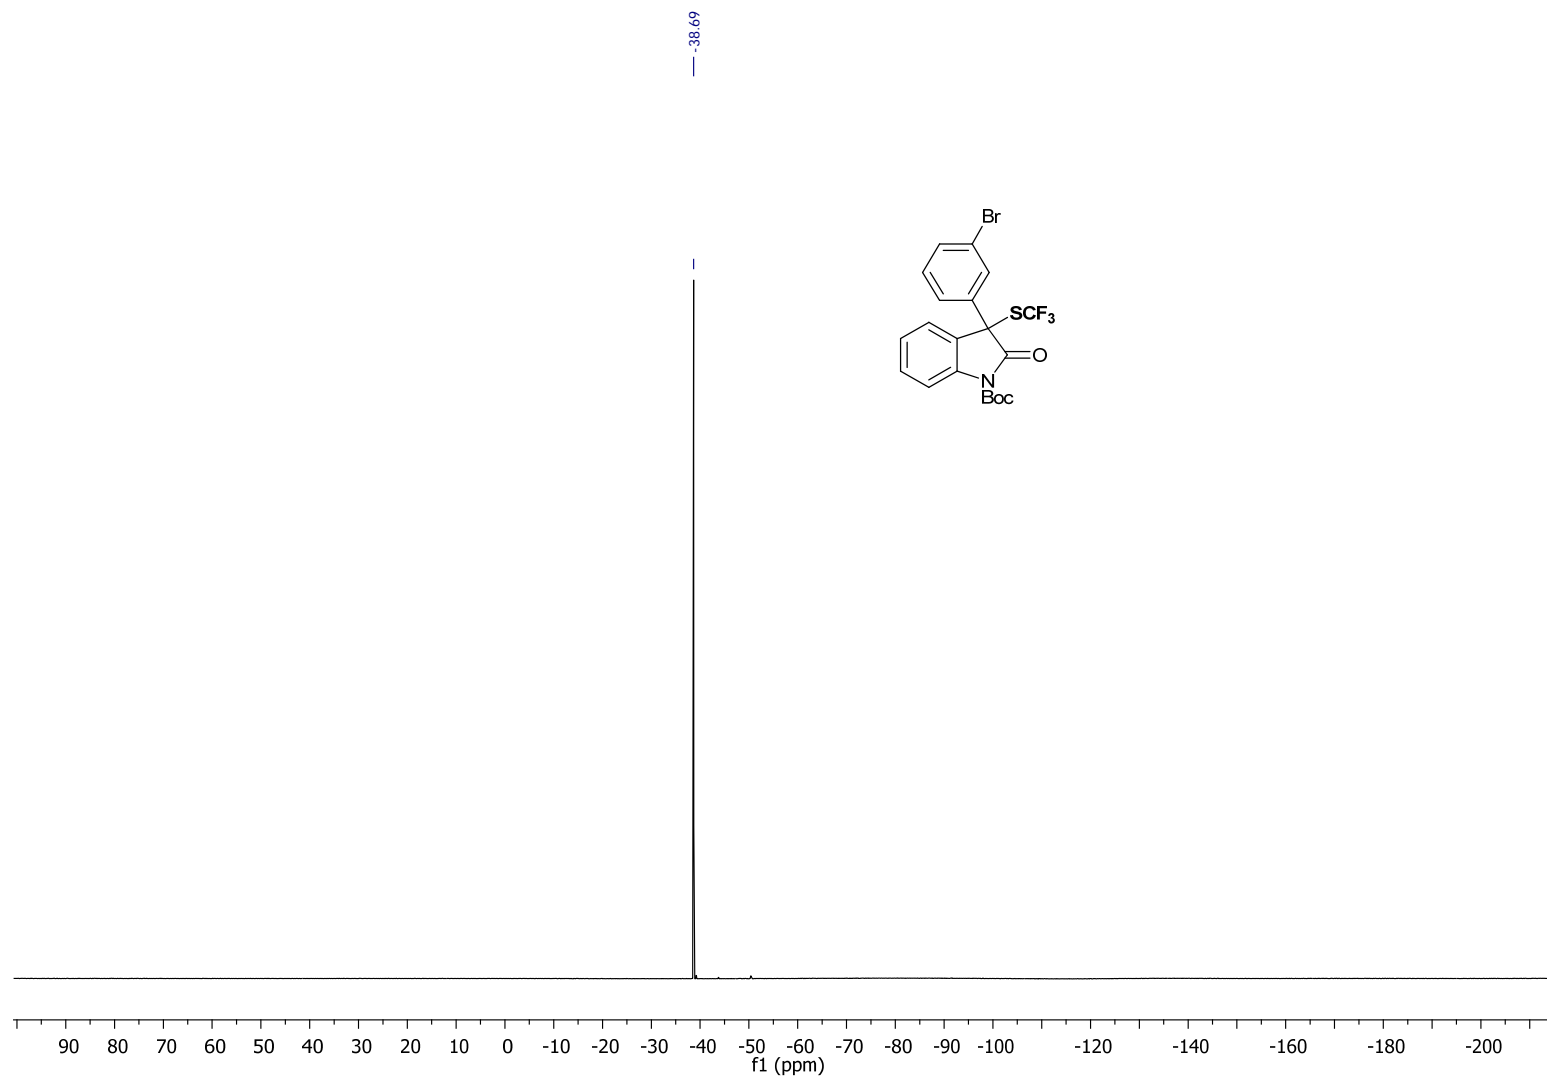

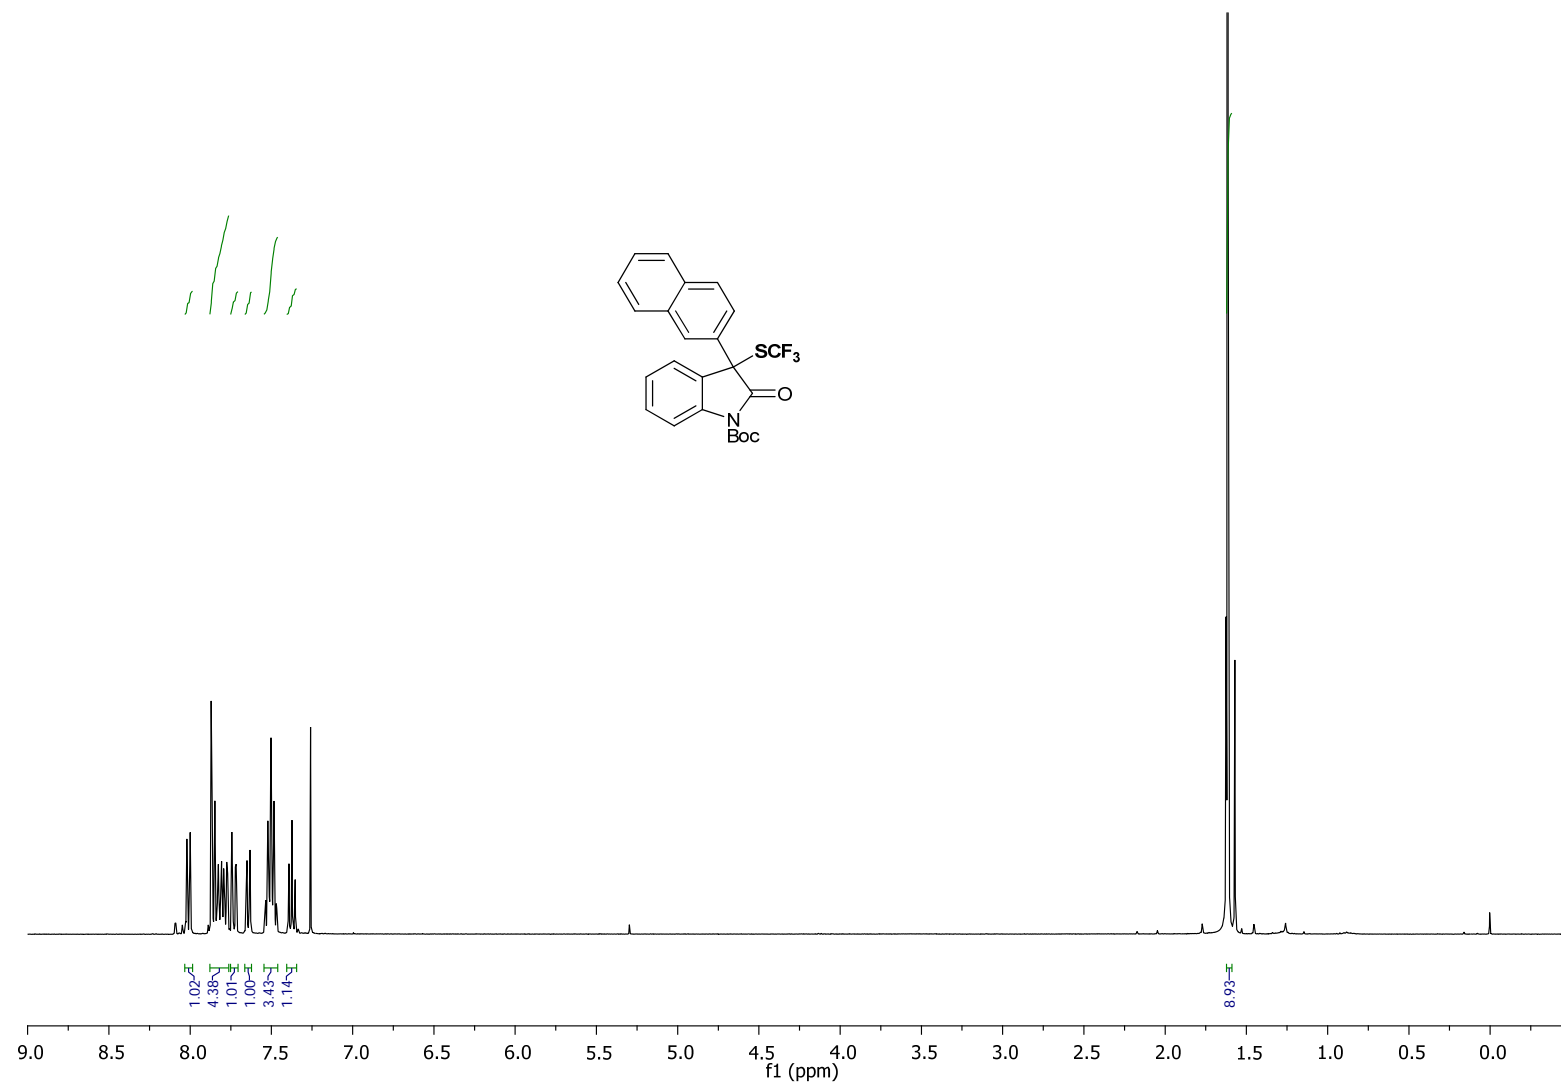



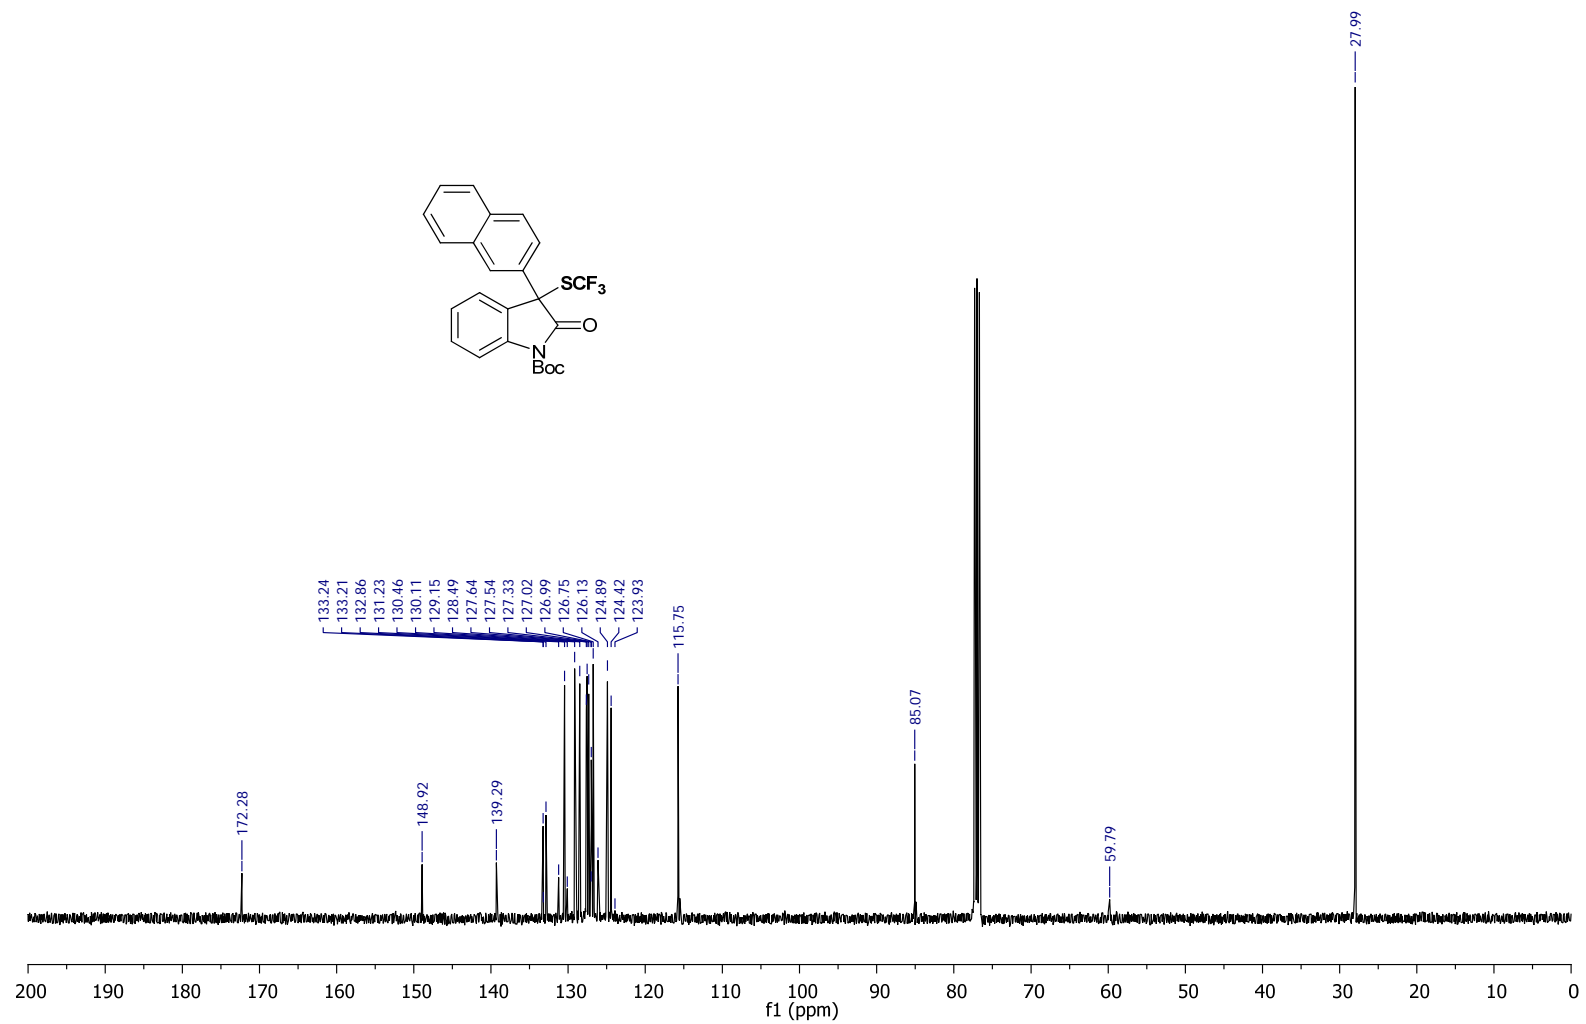

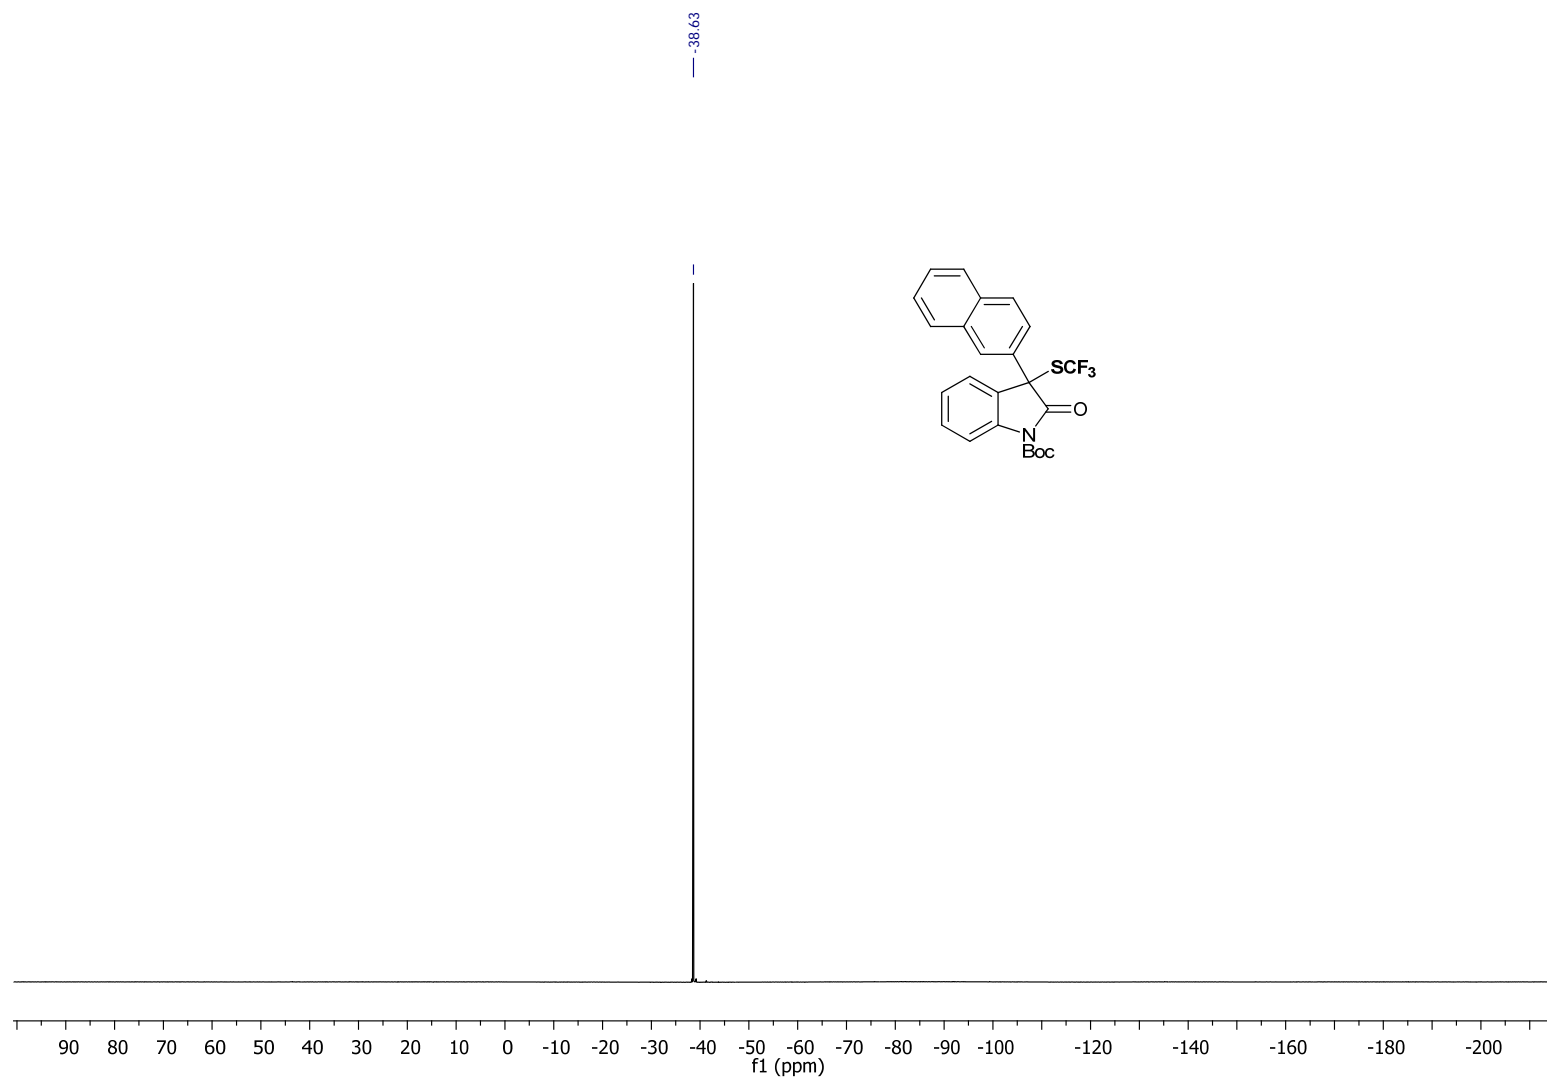

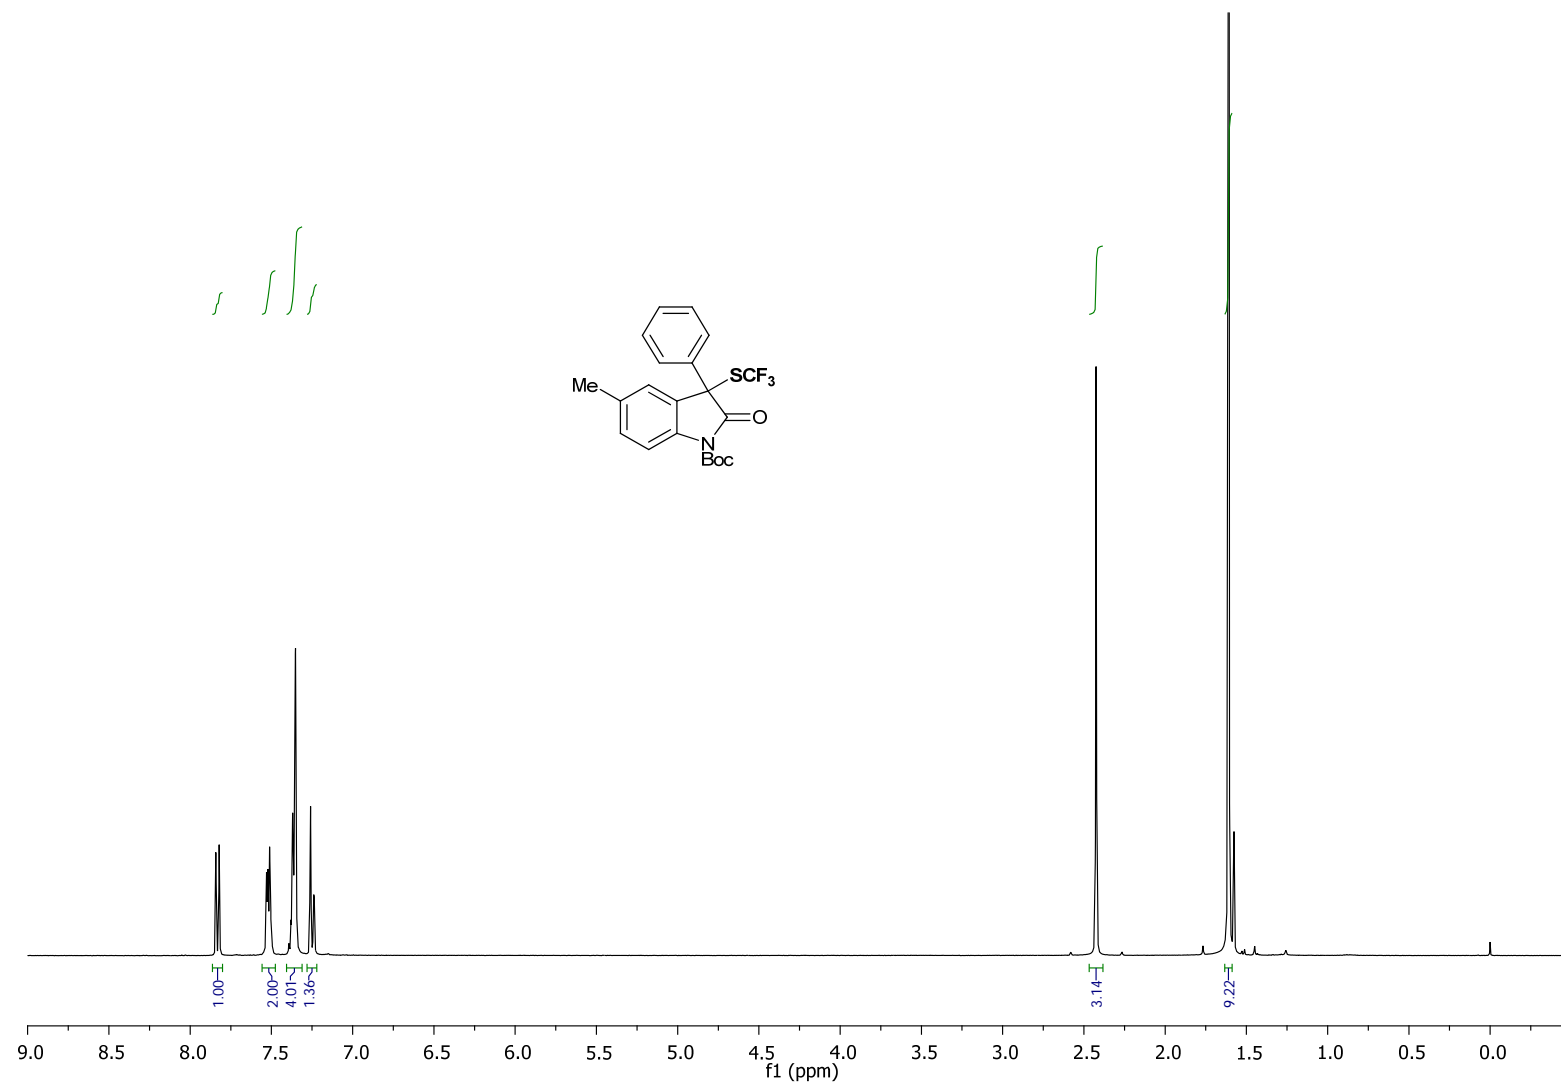

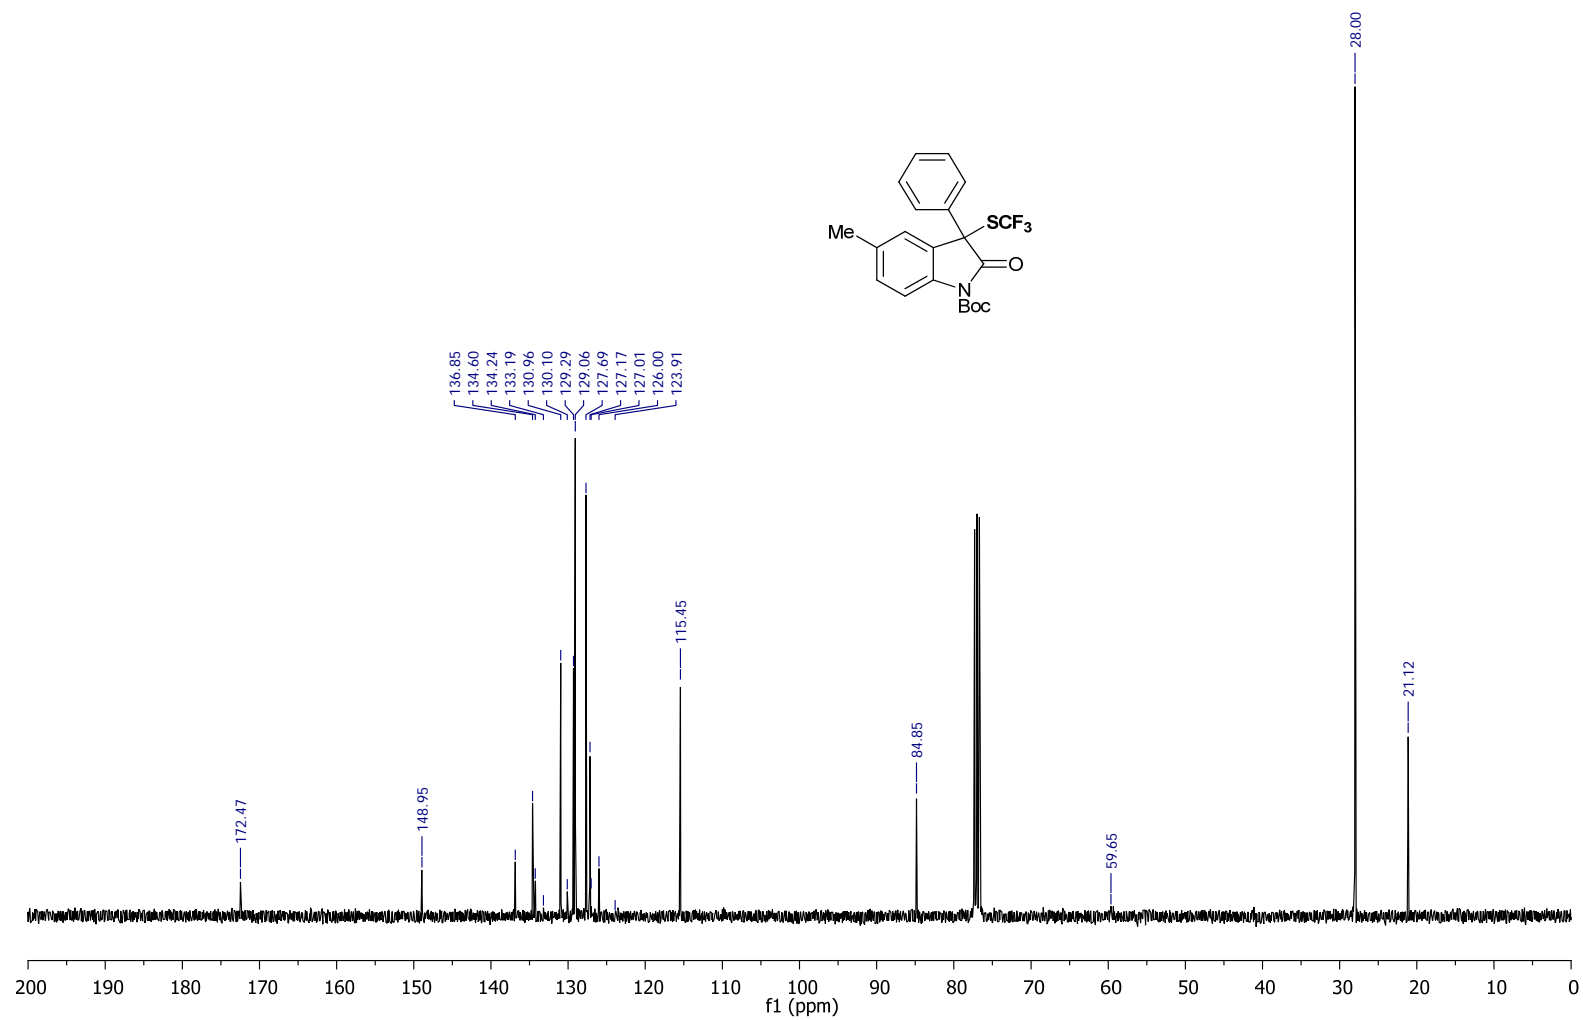

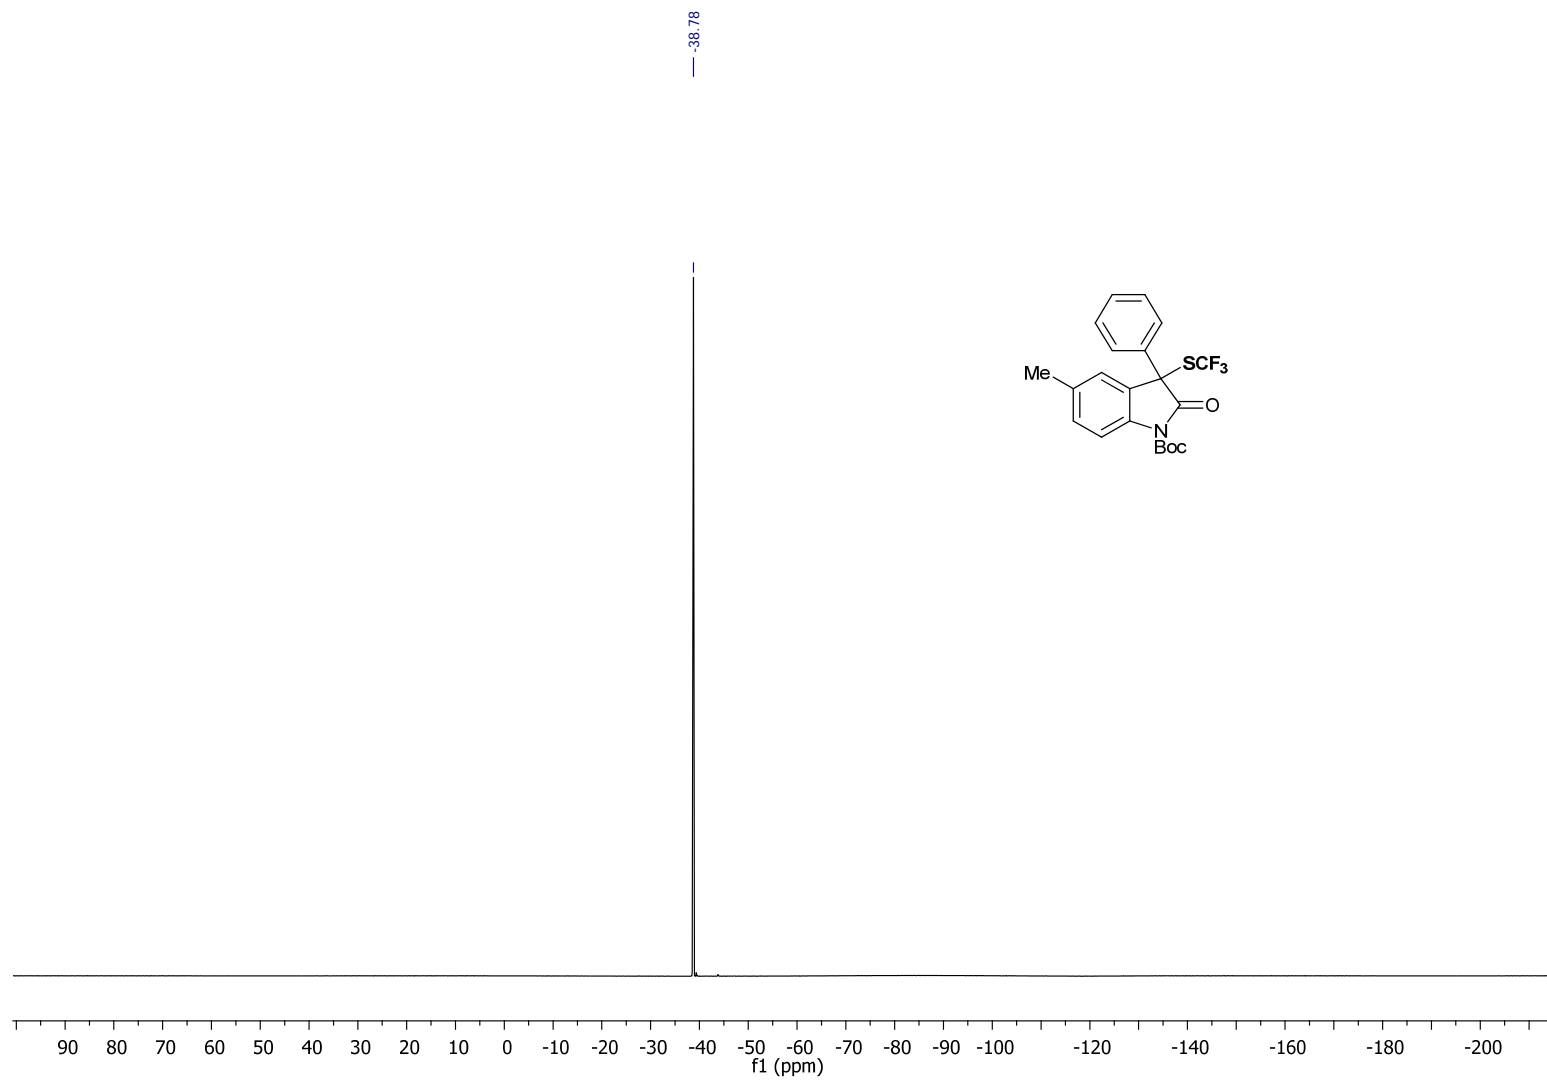

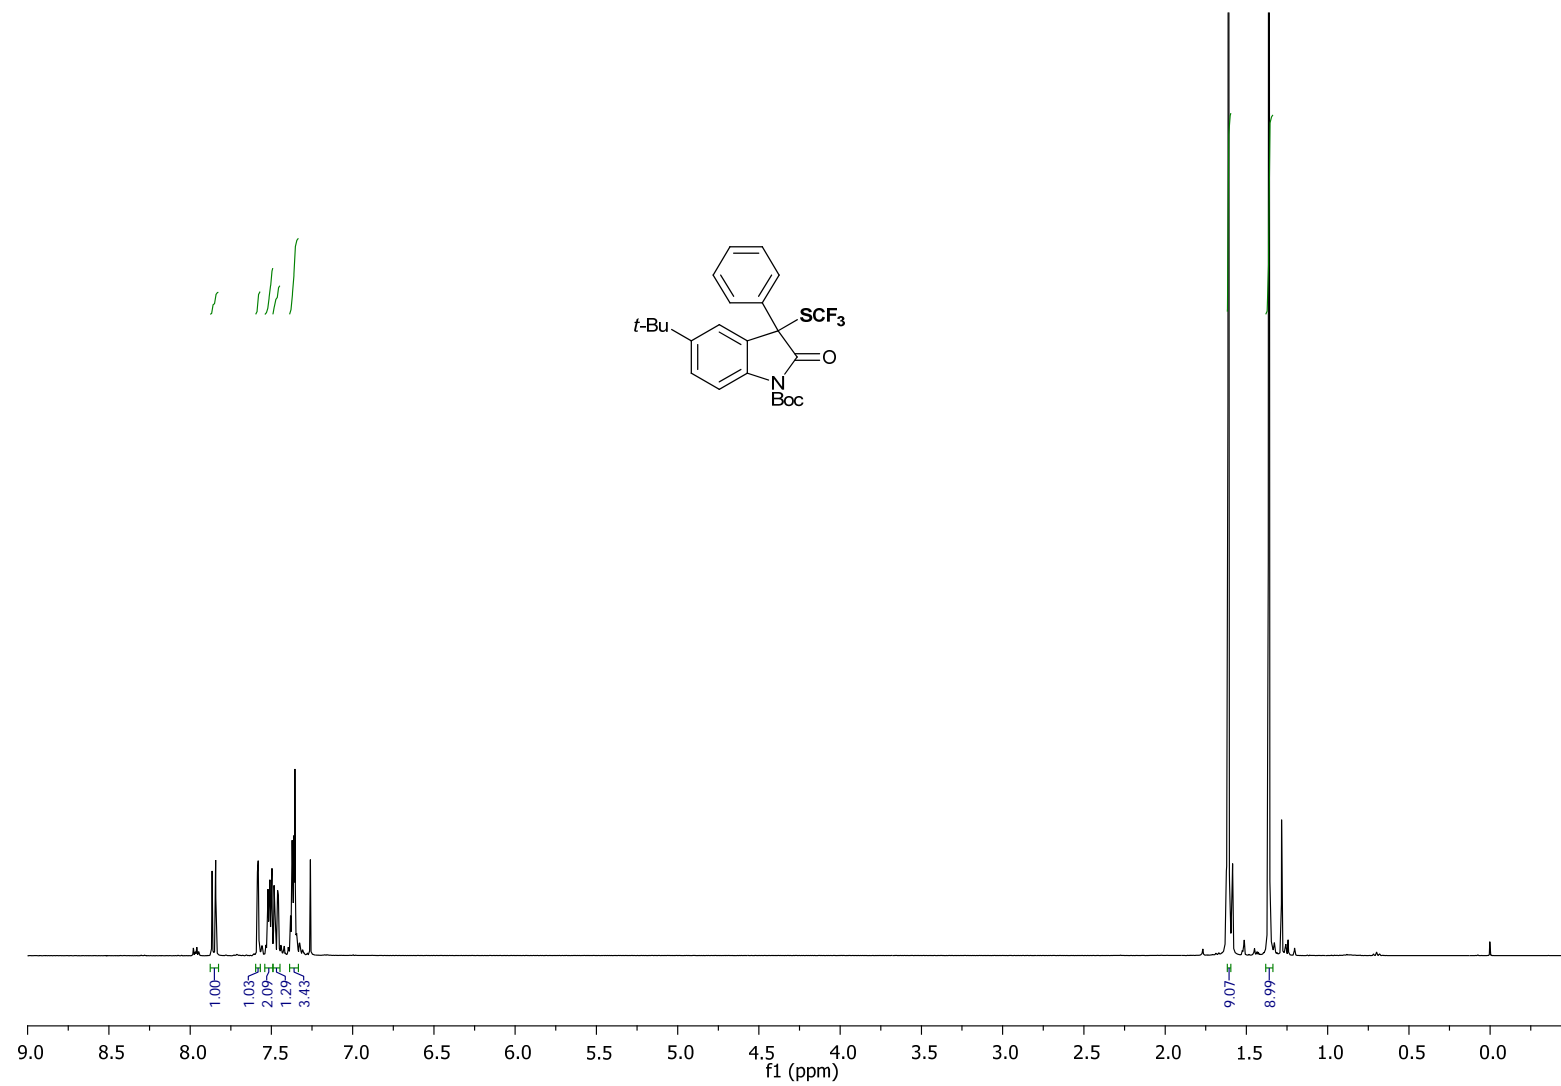

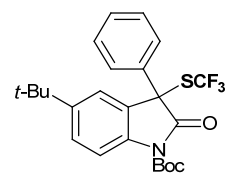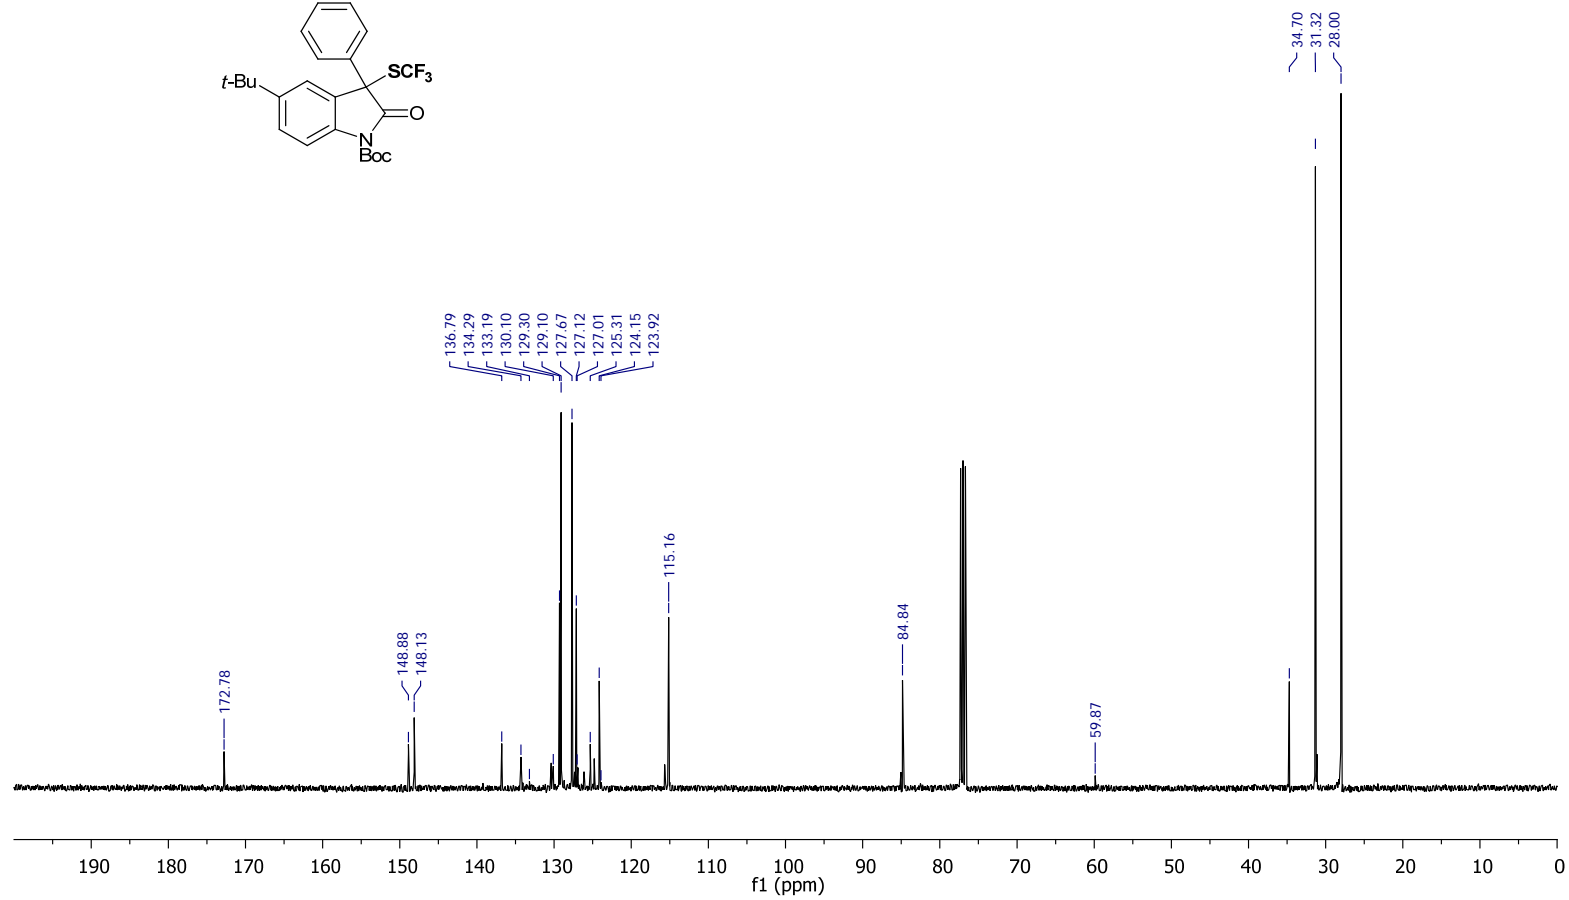

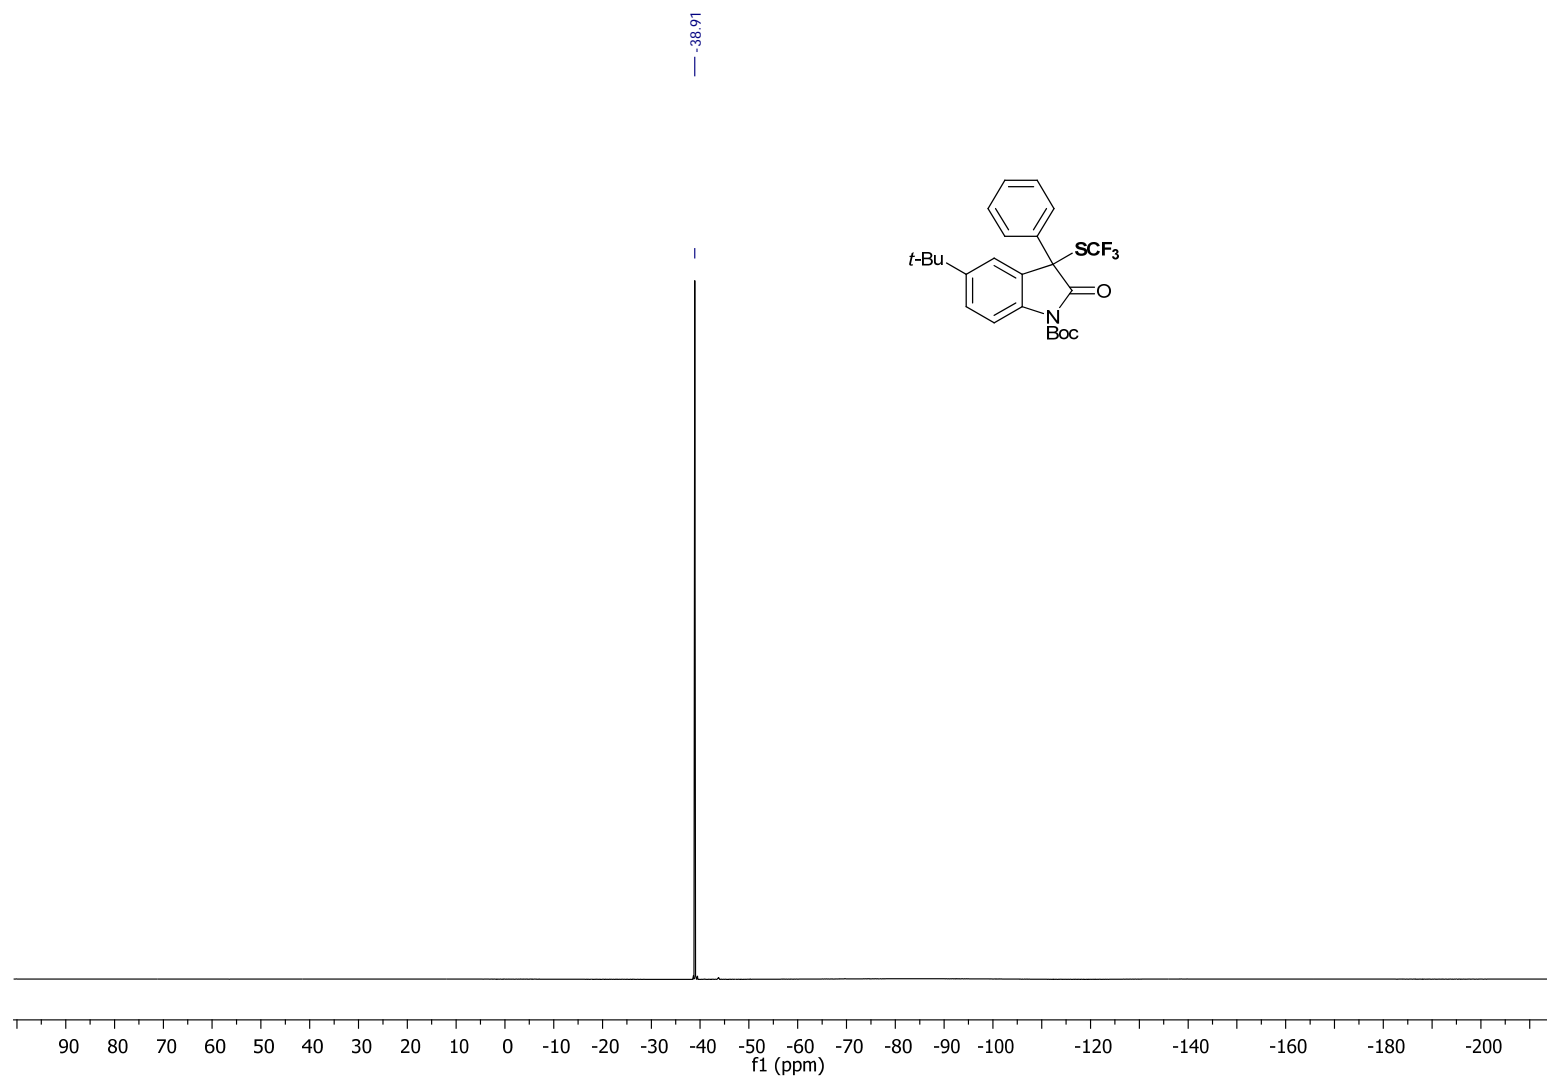



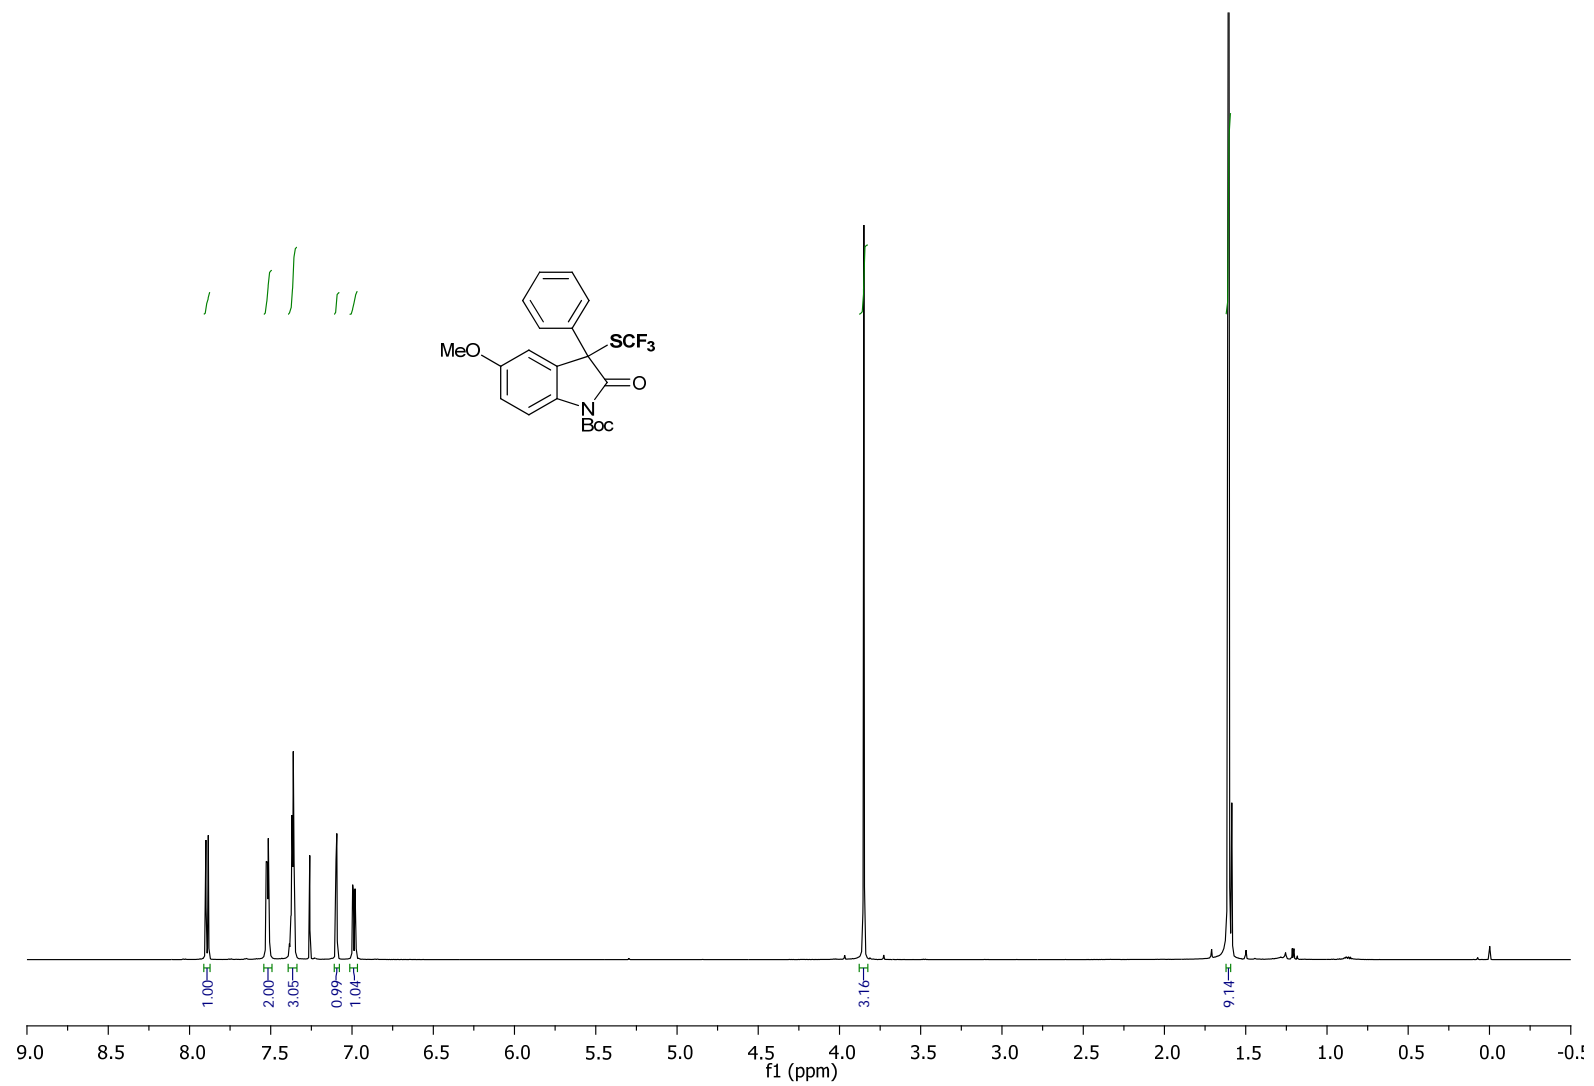

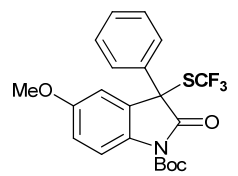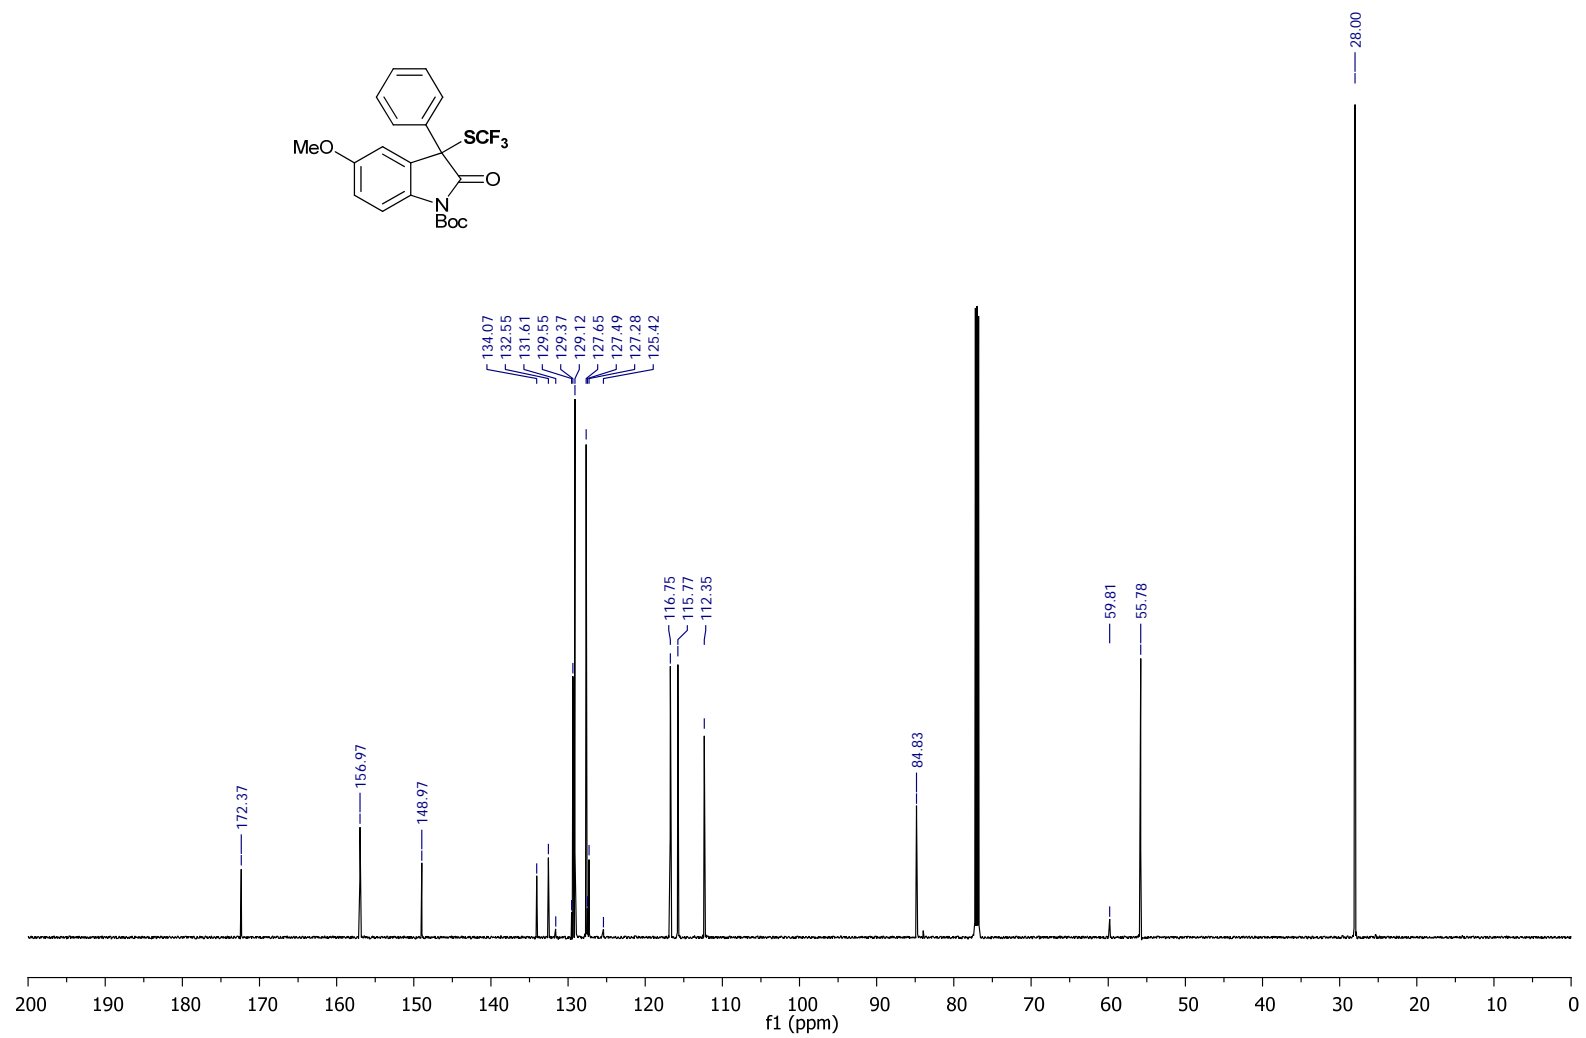

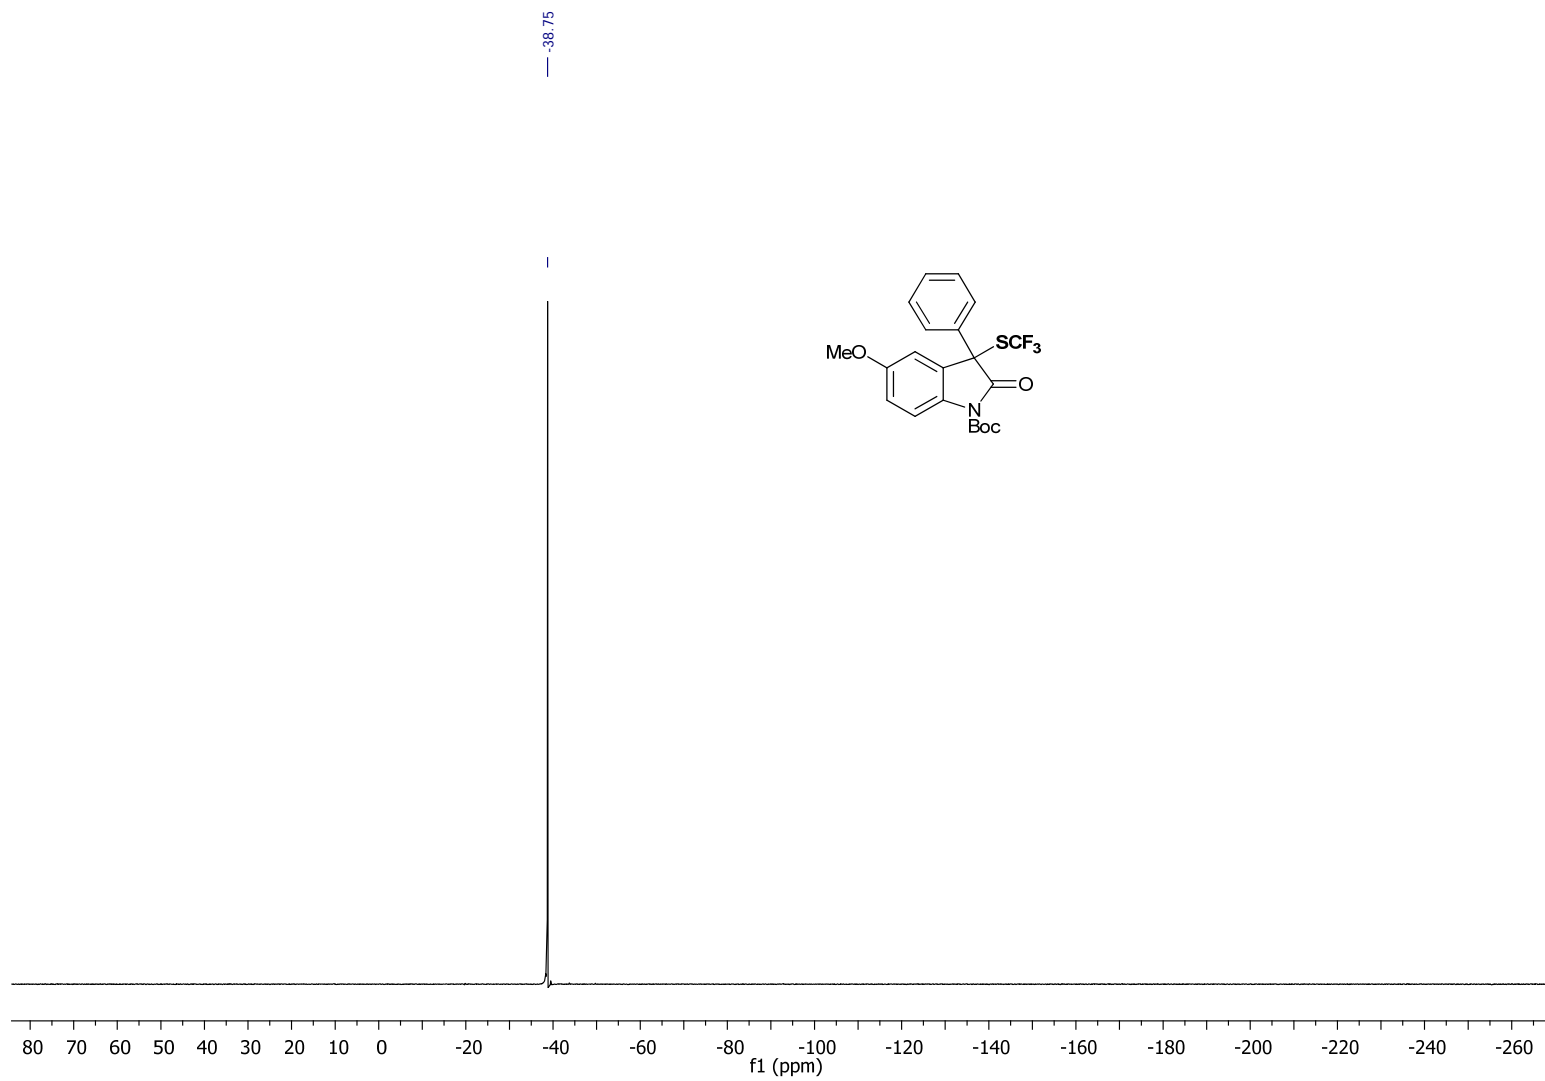

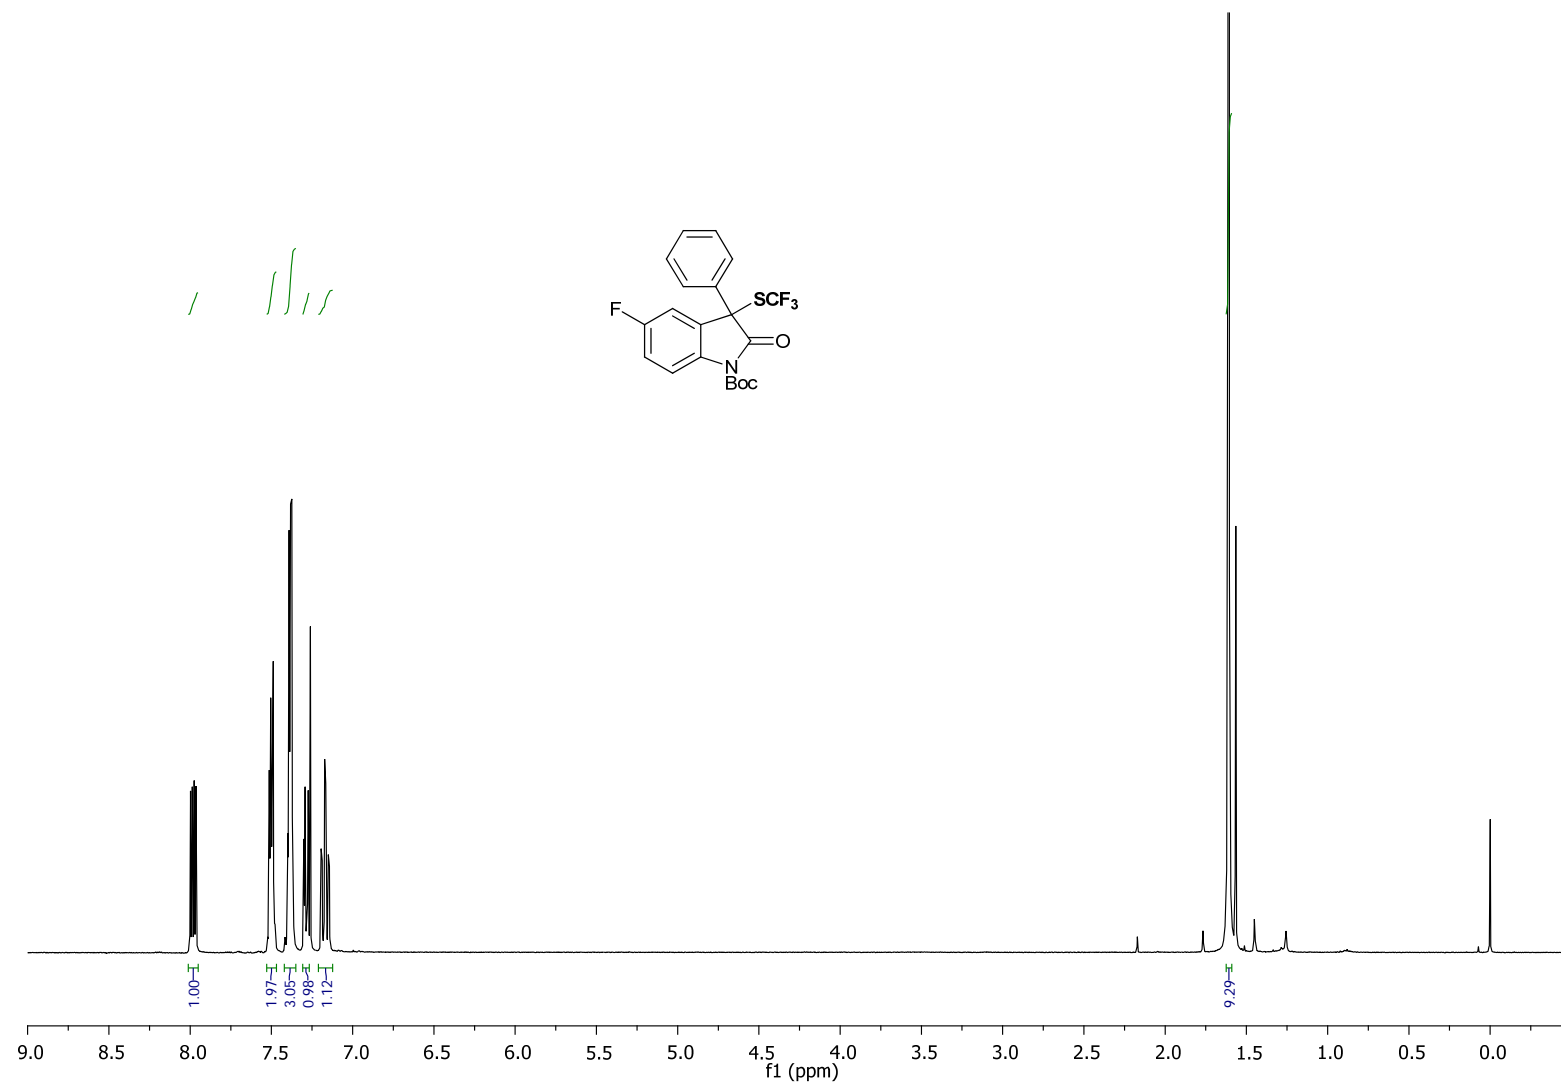

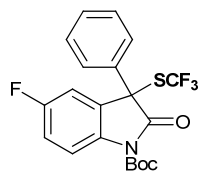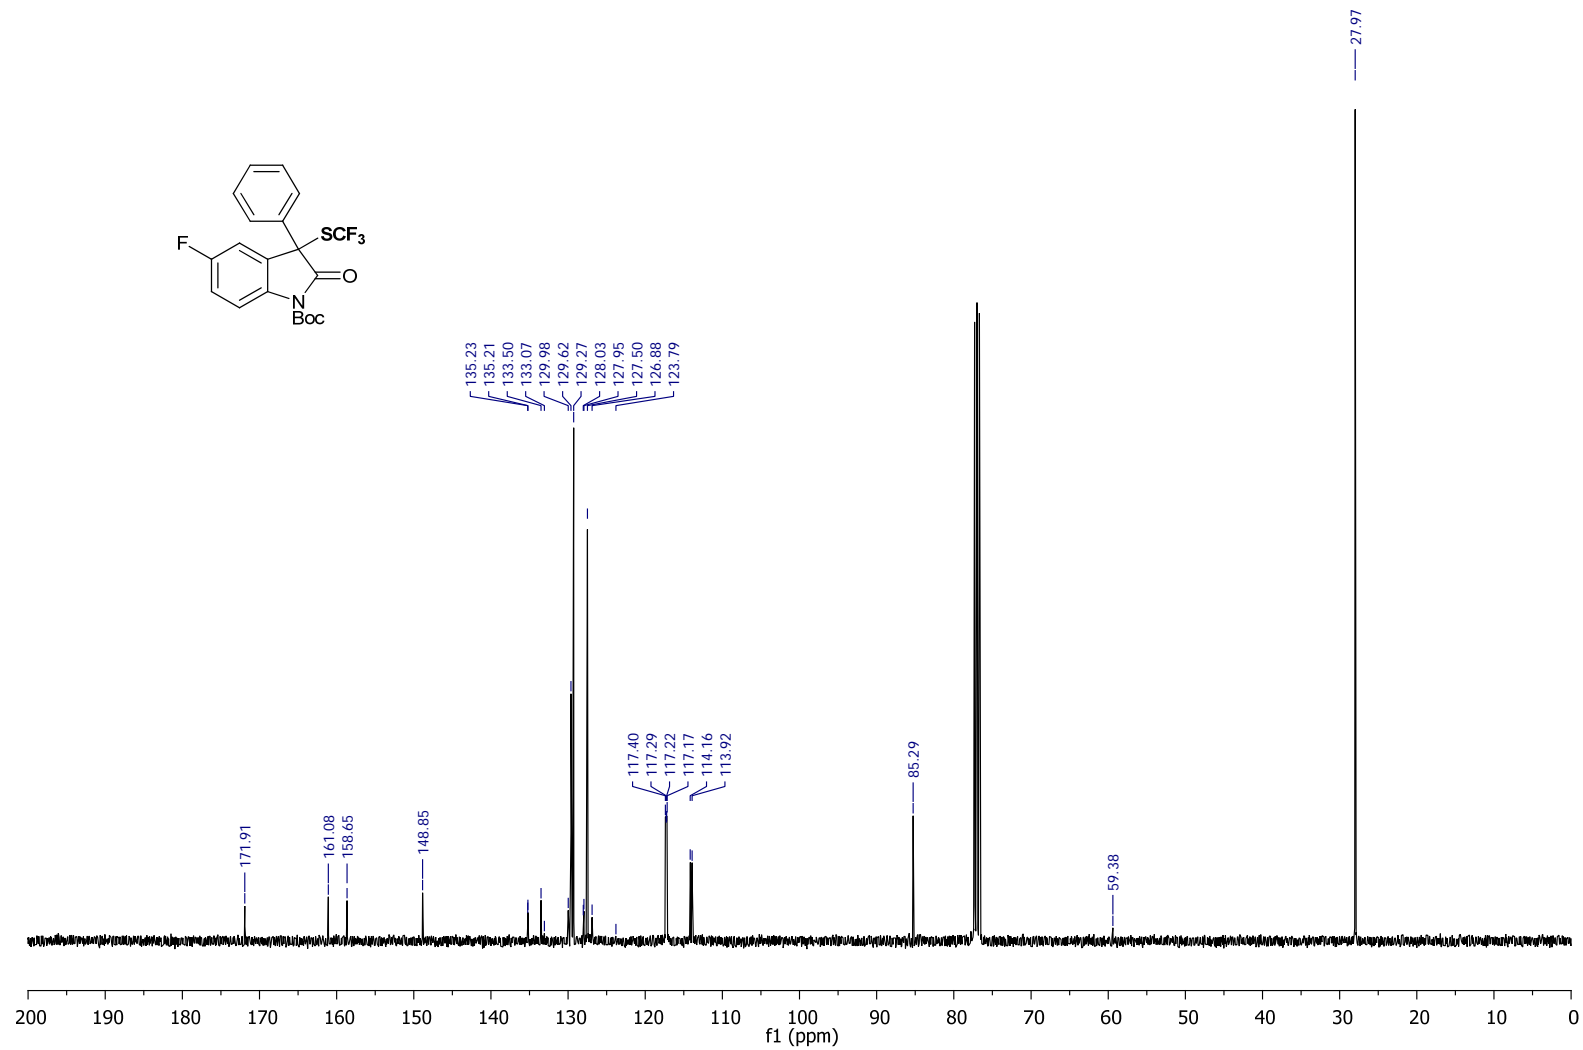

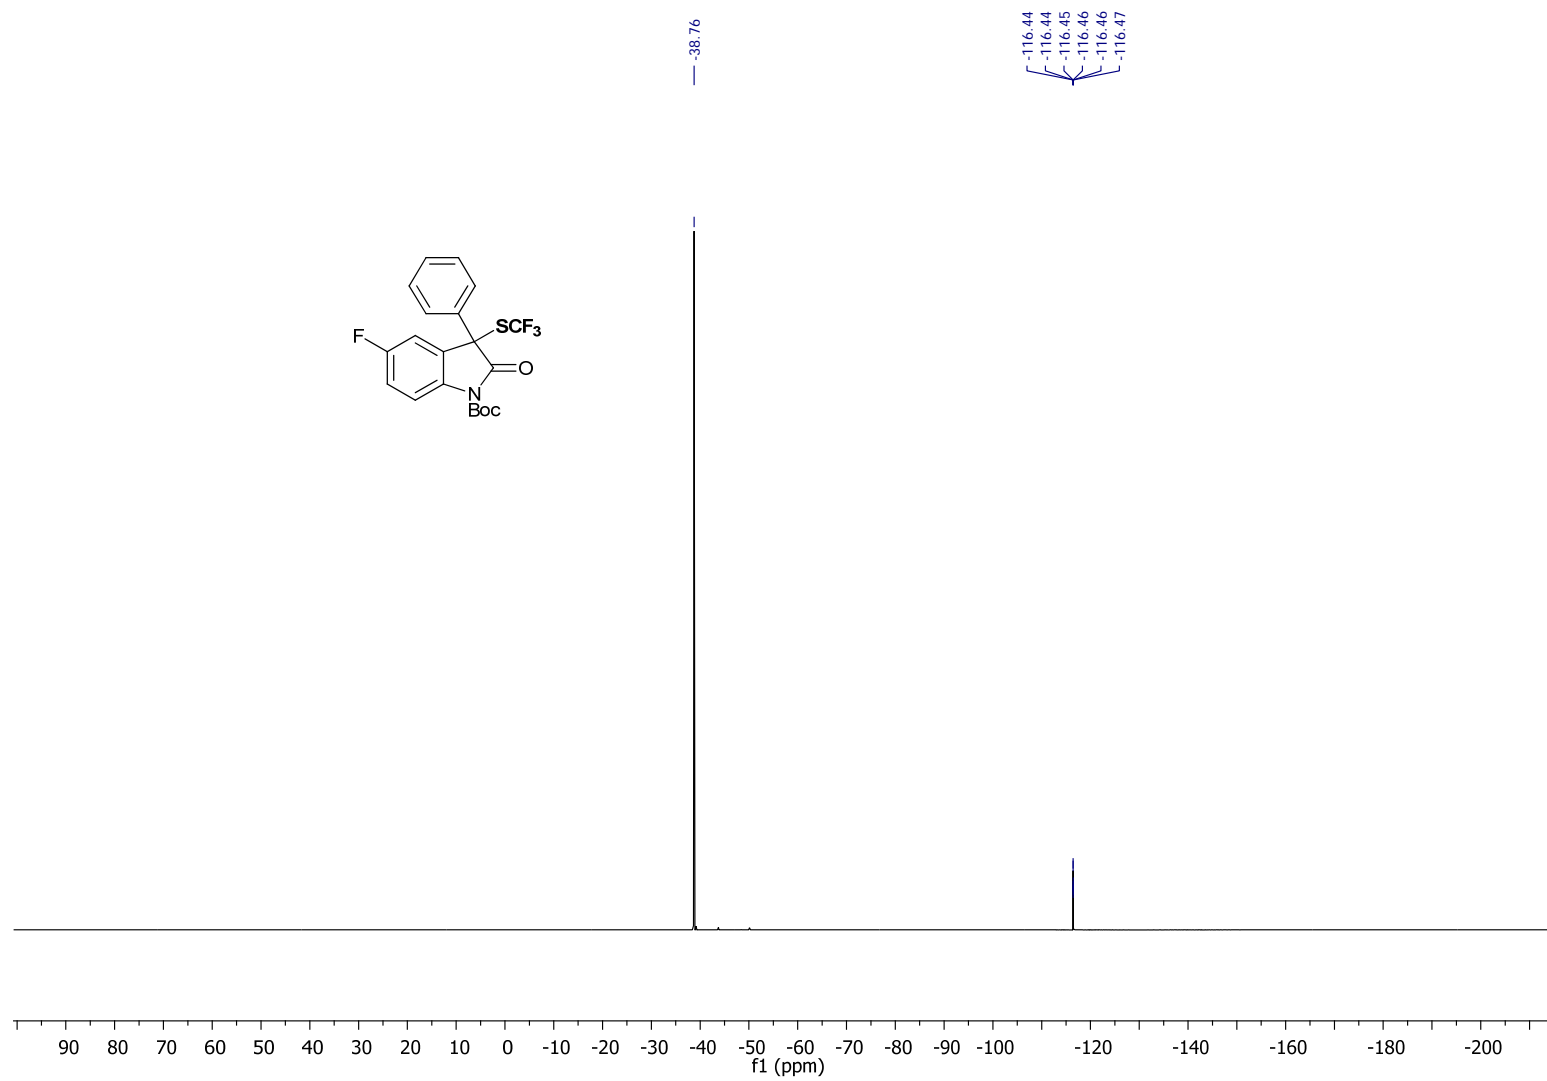

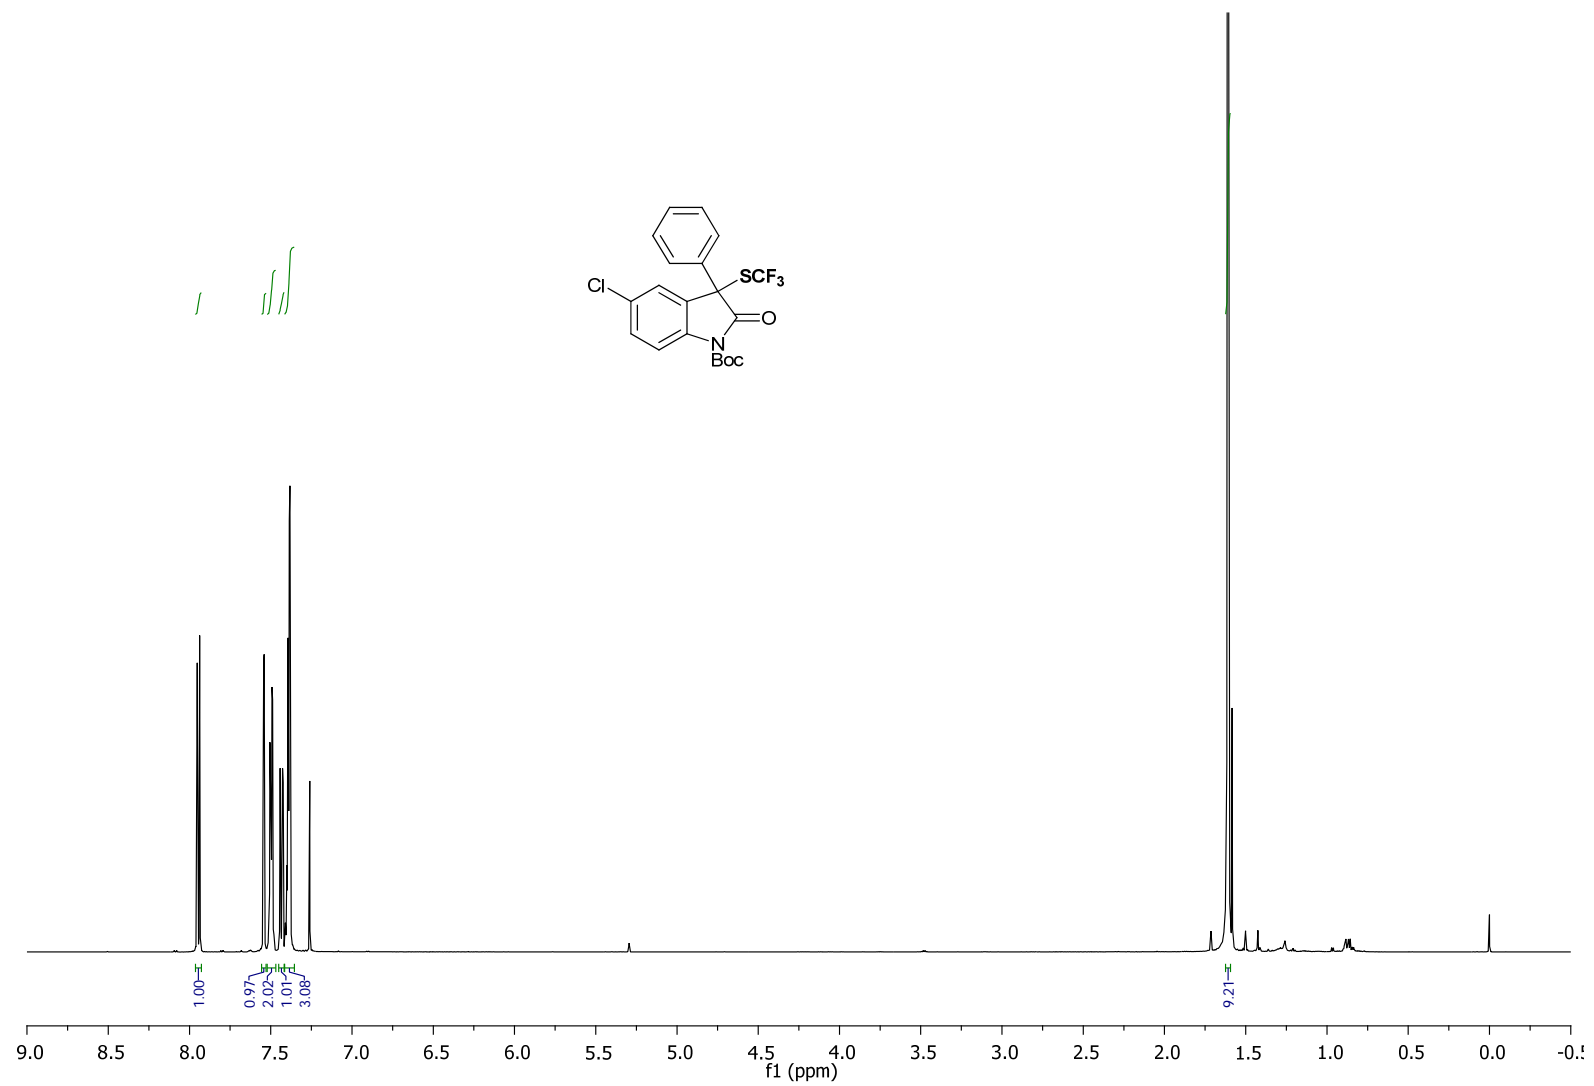

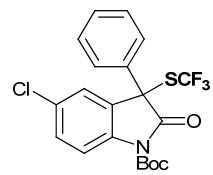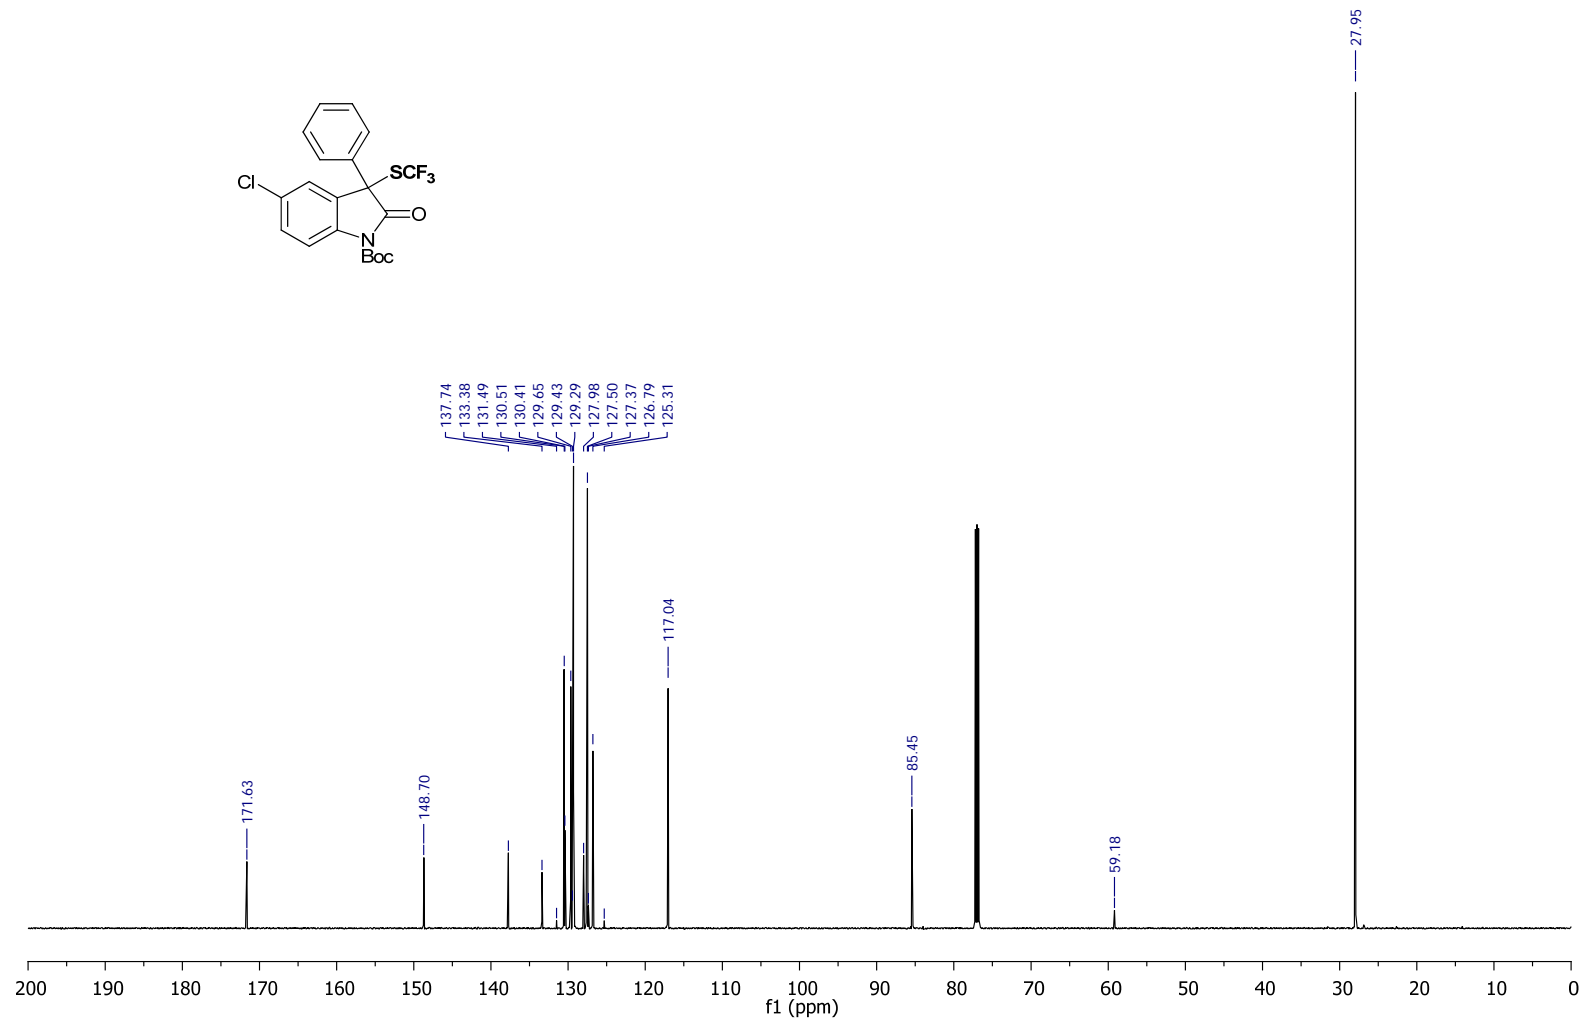



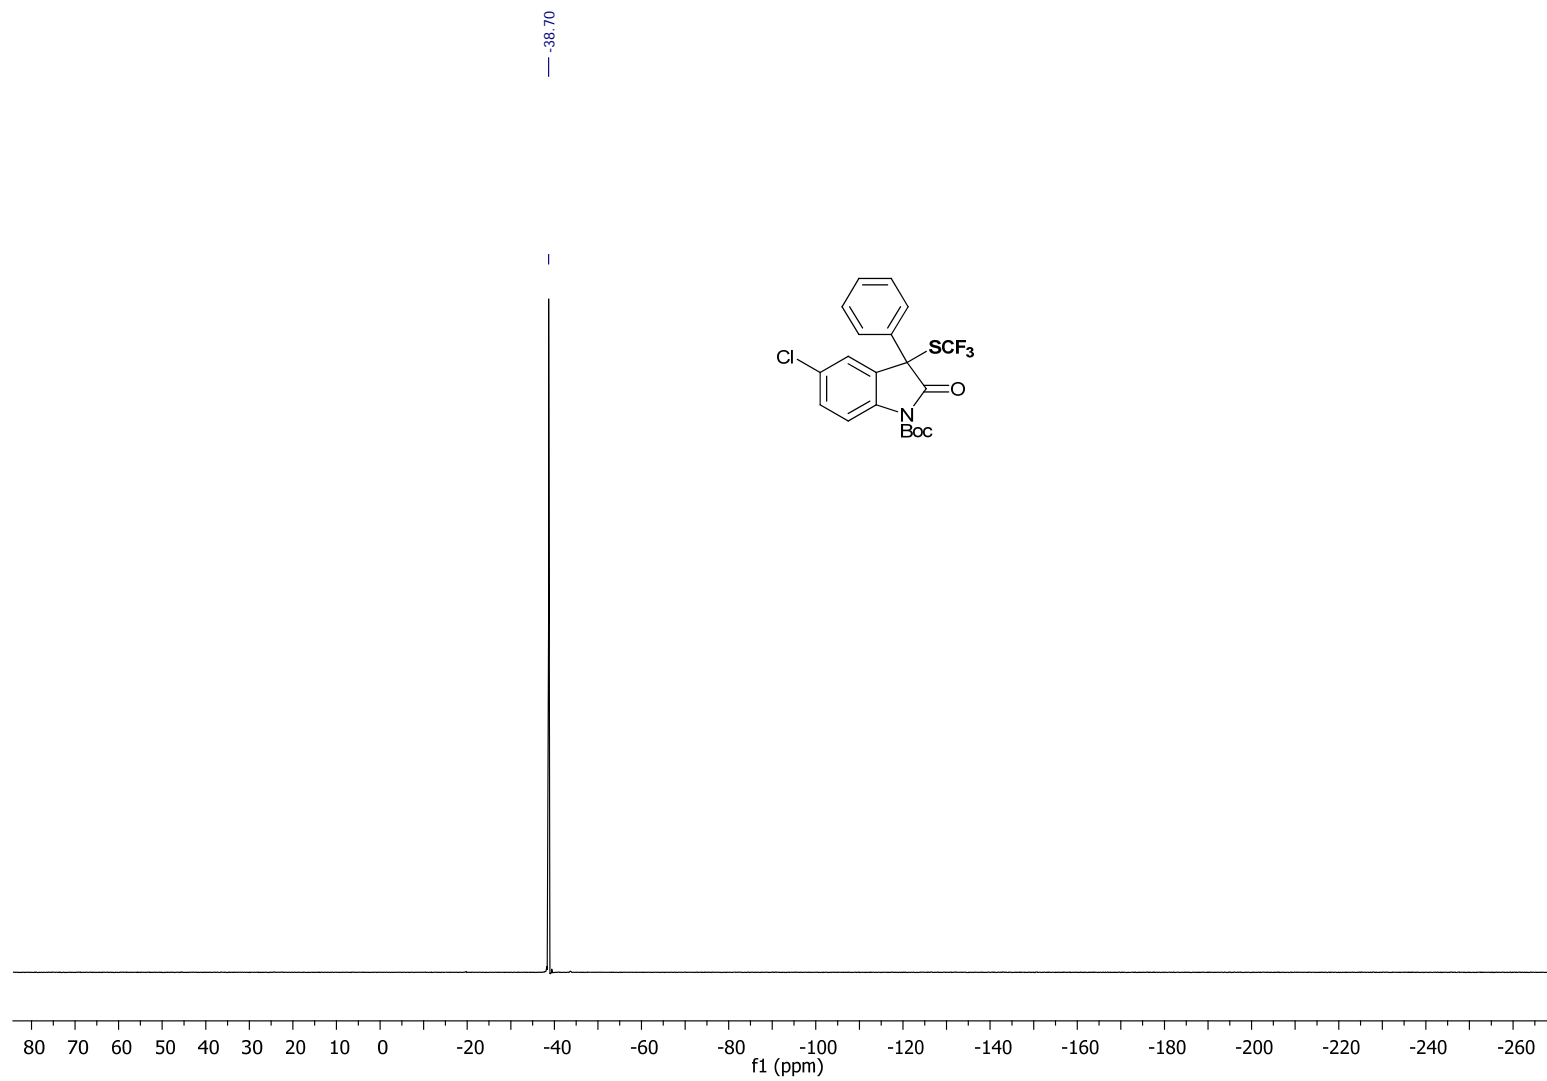

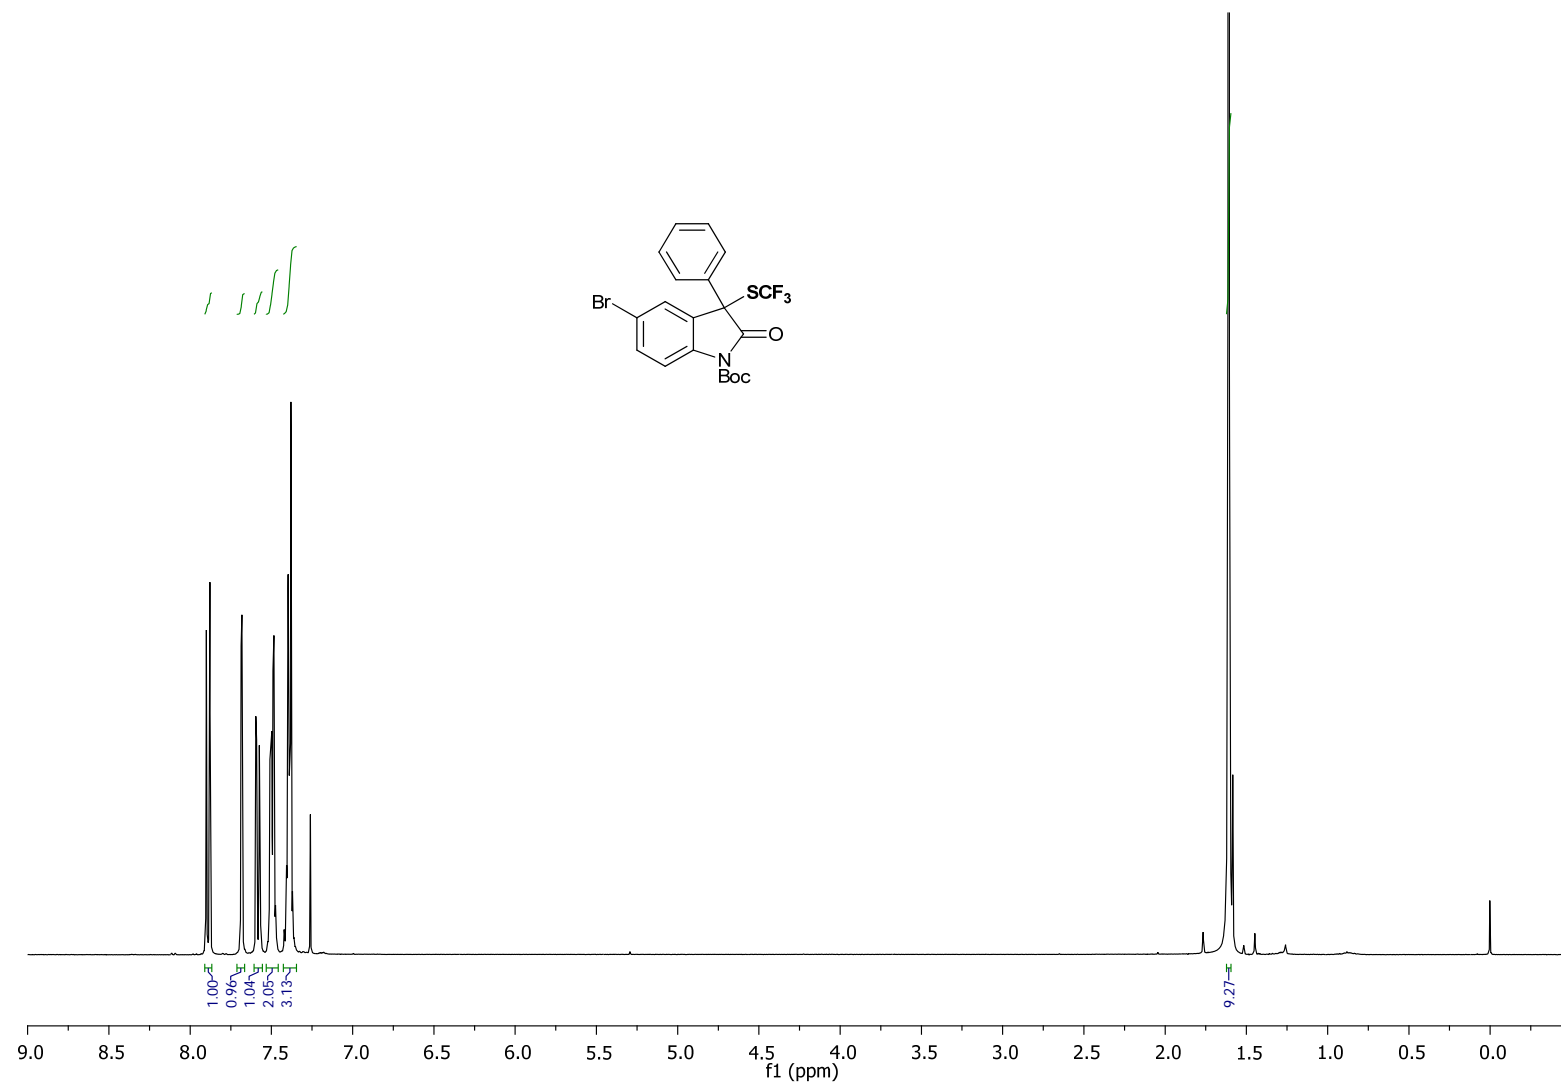

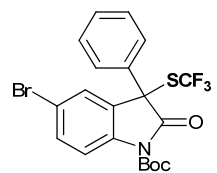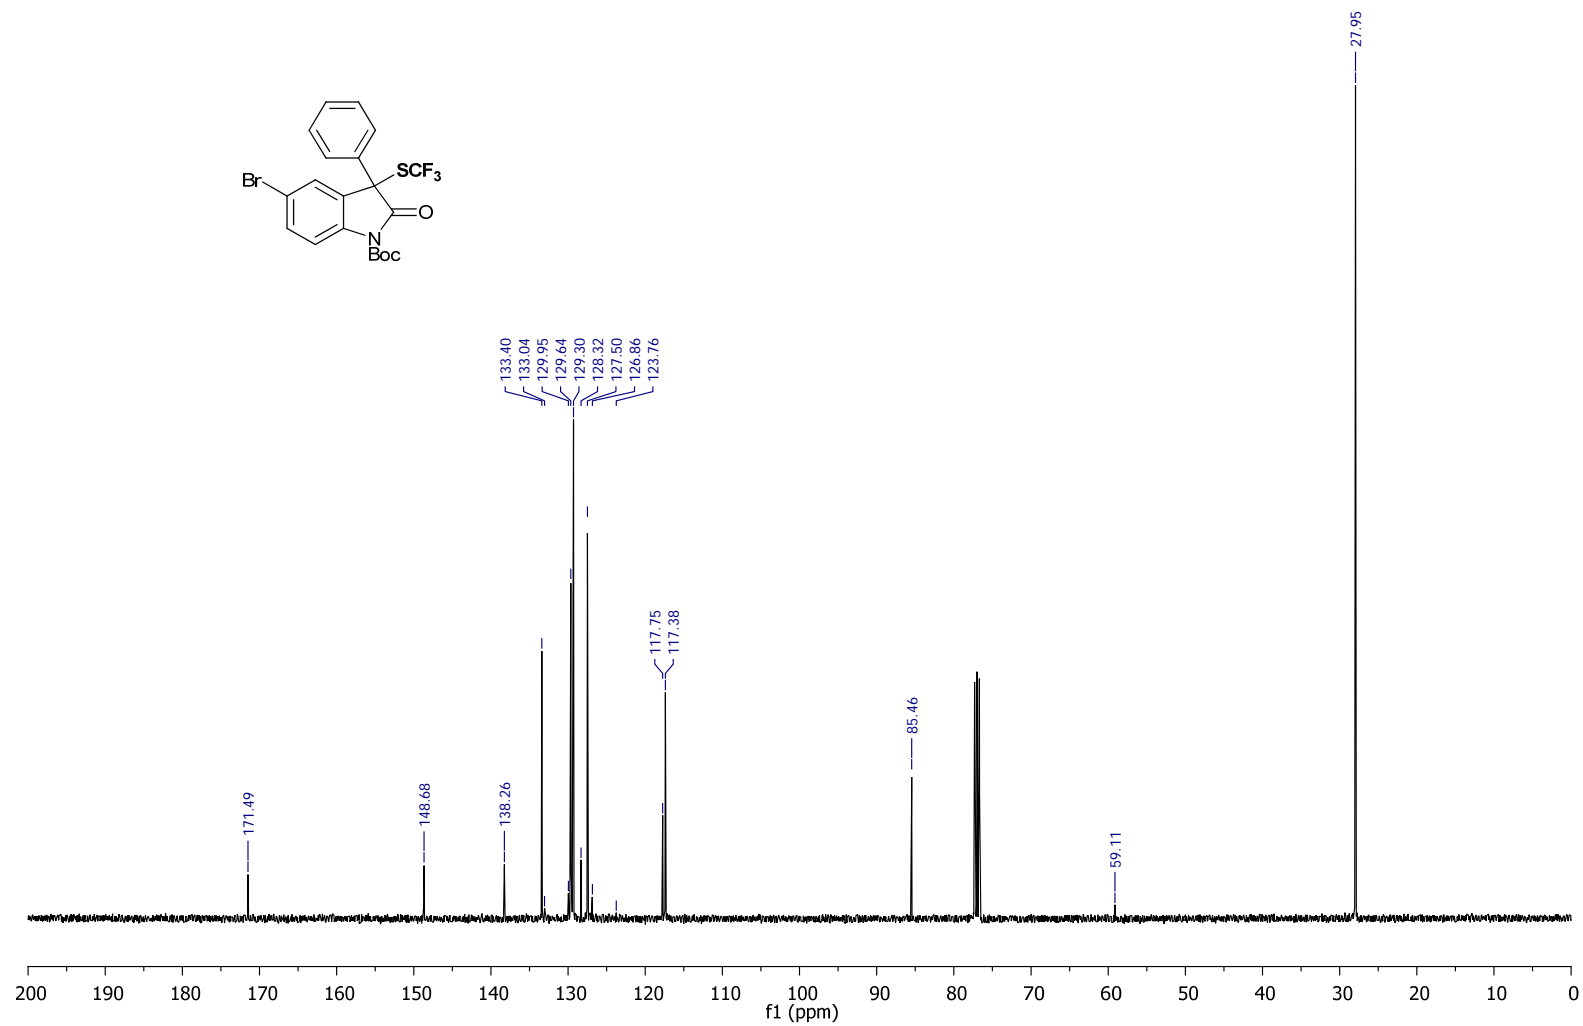

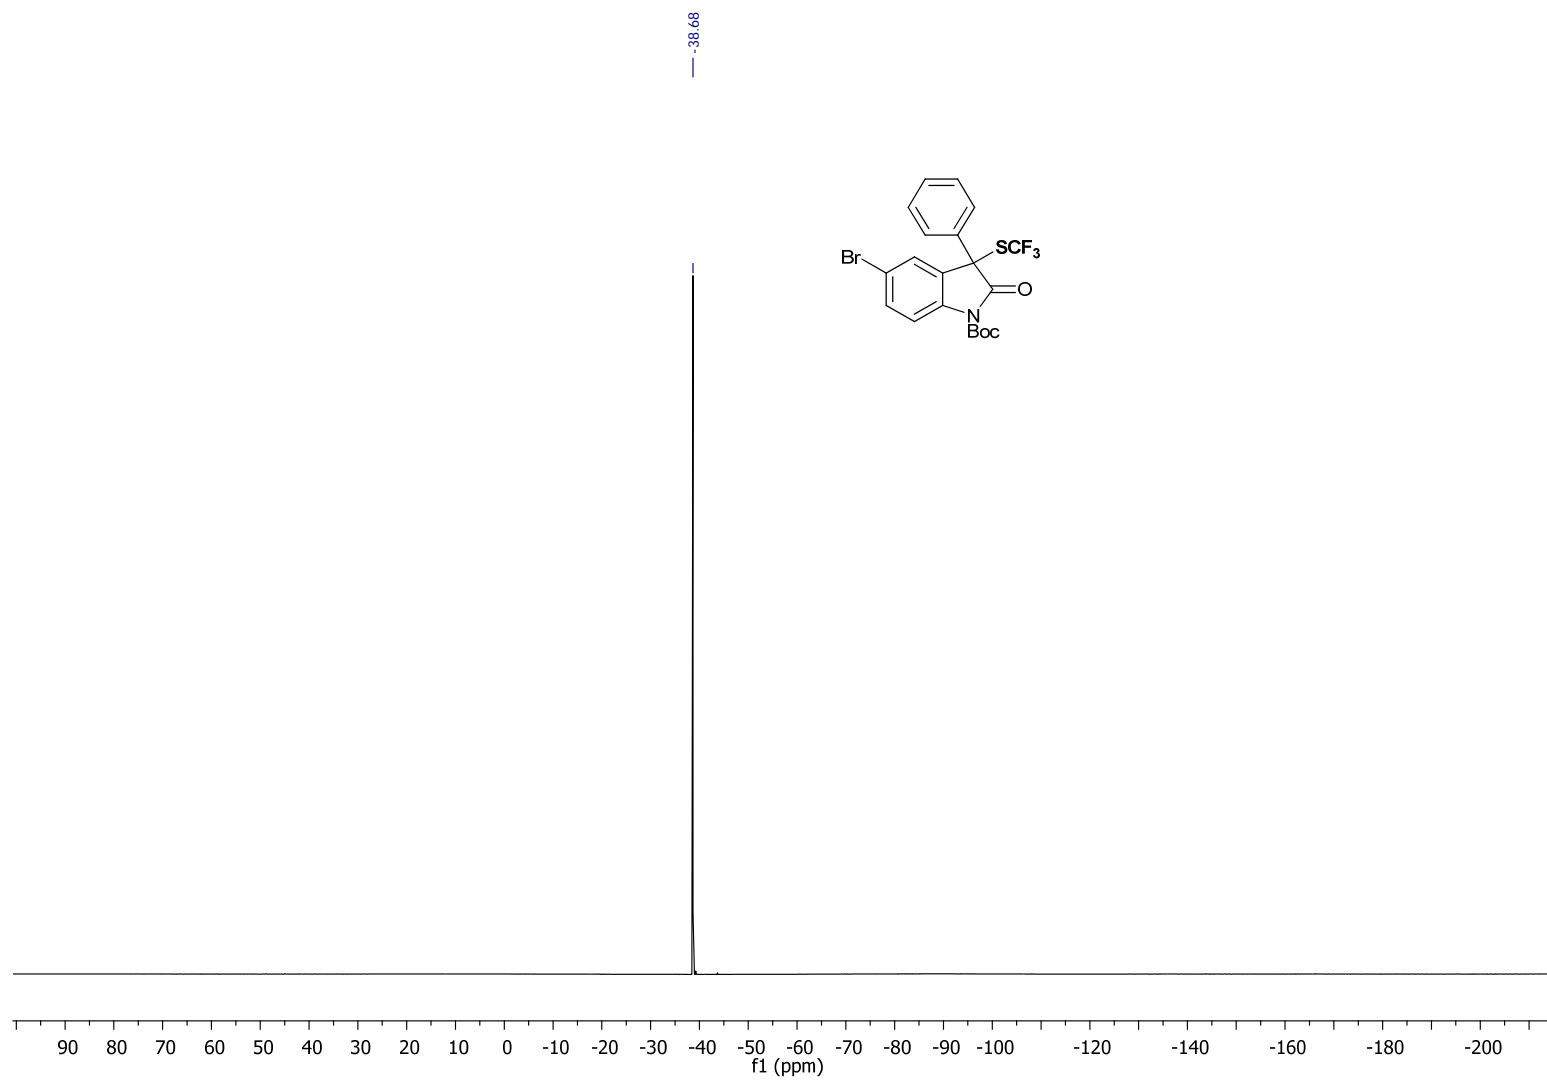

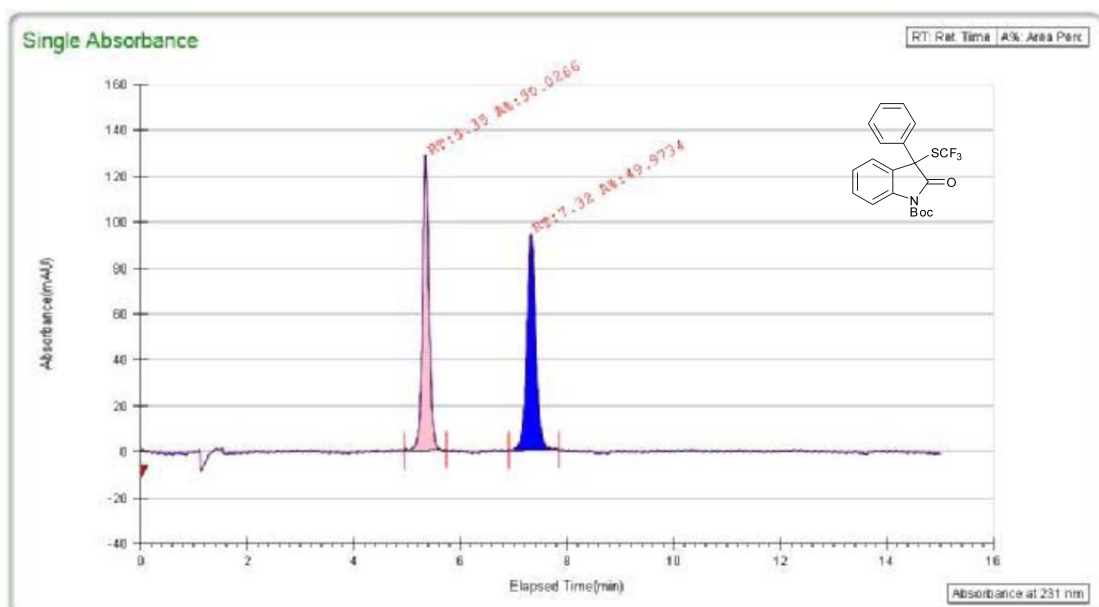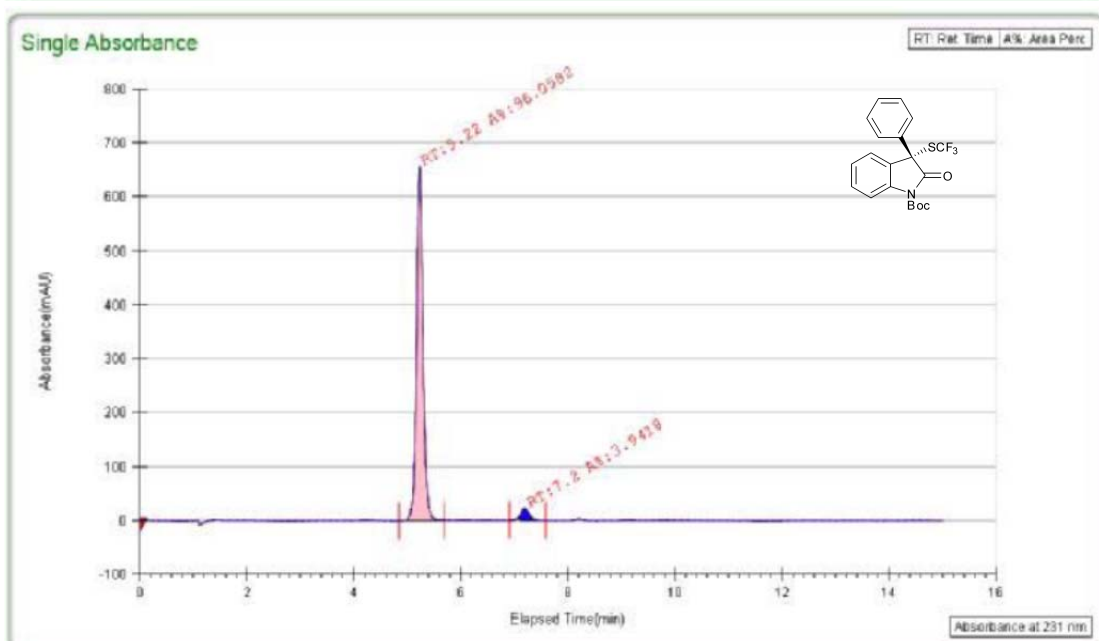

| Peak Number | Area %  | Area      | RT (min) | St. (min) | End (min) |
|-------------|---------|-----------|----------|-----------|-----------|
| 1           | 96.0582 | 5555.0719 | 5.22     | 4.8446    | 5.6962    |
| 2           | 3.9418  | 227.957   | 7.2      | 6.9095    | 7.5828    |

### Chromatogram : XL380Ra\_IA\_991\_flow1\_40999913

Data file: XL380Ra\_IA\_991\_flow1\_40999913.DATA  
Method: HPLC1\_IA\_991\_flow1\_acq\_40  
Date: 2013/8/13 2:13:58

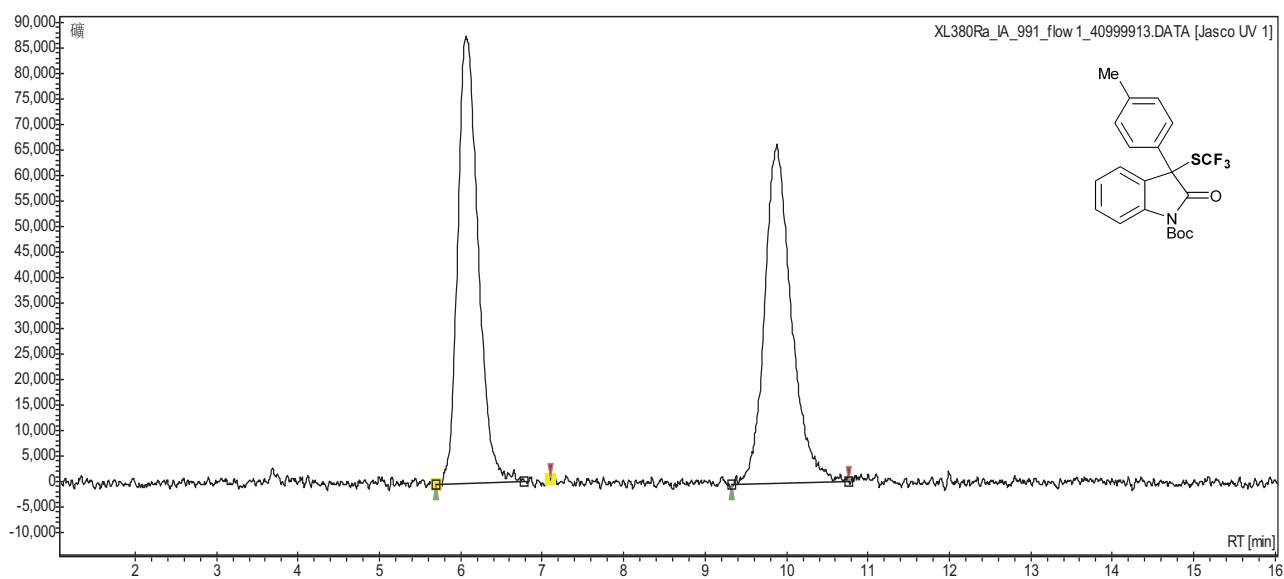

XL380Ra\_IA\_991\_flow1\_40999913.DATA [Jasco UV 1]

| Index | Start [Min] | Time [Min] | End [Min] | Area %  |
|-------|-------------|------------|-----------|---------|
| 1     | 5.702       | 6.067      | 7.107     | 50.015  |
| 2     | 9.331       | 9.883      | 10.765    | 49.985  |
| Total |             |            |           | 100.000 |

### Chromatogram : XL380\_IA\_991\_flow1\_40999914

Data file: XL380\_IA\_991\_flow1\_40999914.DATA  
Method: HPLC1\_IA\_991\_flow1\_acq\_40  
Date: 2013/8/13 2:56:38

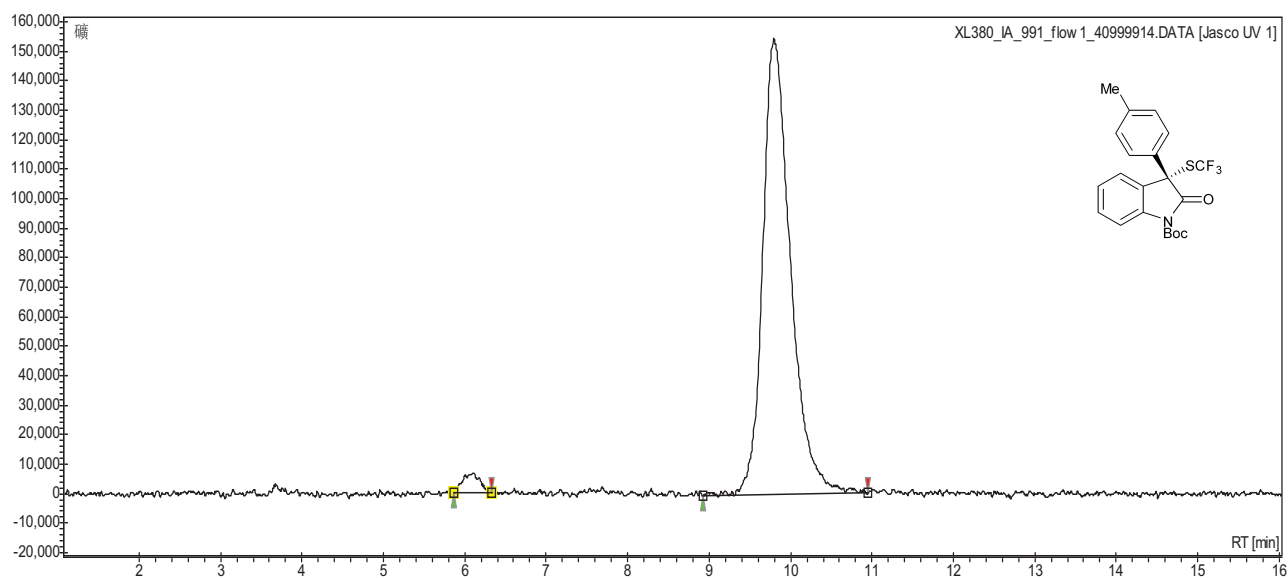

XL380\_IA\_991\_flow1\_40999914.DATA [Jasco UV 1]

| Index | Start [Min] | Time [Min] | End [Min] | Area %  |
|-------|-------------|------------|-----------|---------|
| 2     | 5.859       | 6.100      | 6.329     | 2.631   |
| 1     | 8.926       | 9.800      | 10.950    | 97.369  |
| Total |             |            |           | 100.000 |

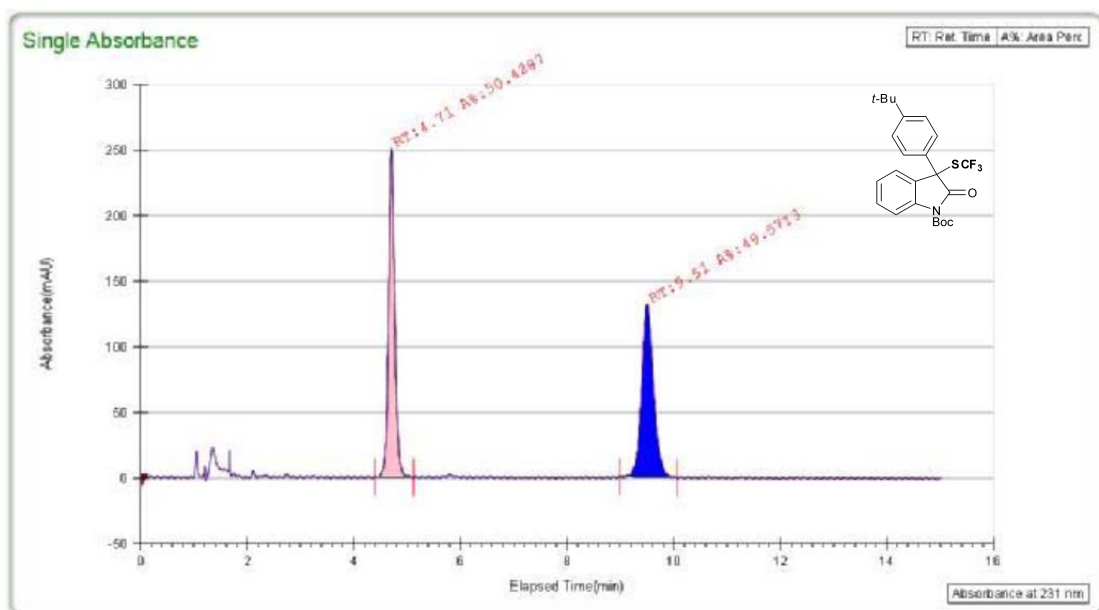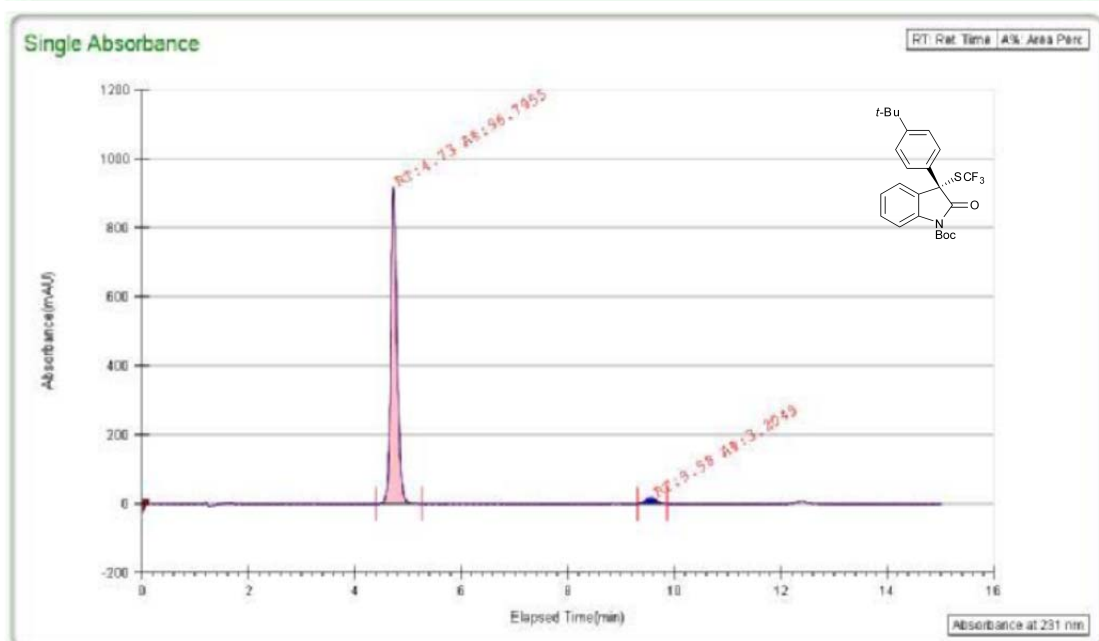

| Peak Number | Area %  | Area      | RT (min) | St. (min) | End (min) |
|-------------|---------|-----------|----------|-----------|-----------|
| 1           | 96.7955 | 7549.2111 | 4.73     | 4.388     | 5.2596    |
| 2           | 3.2045  | 249.9231  | 9.58     | 9.3113    | 9.8648    |

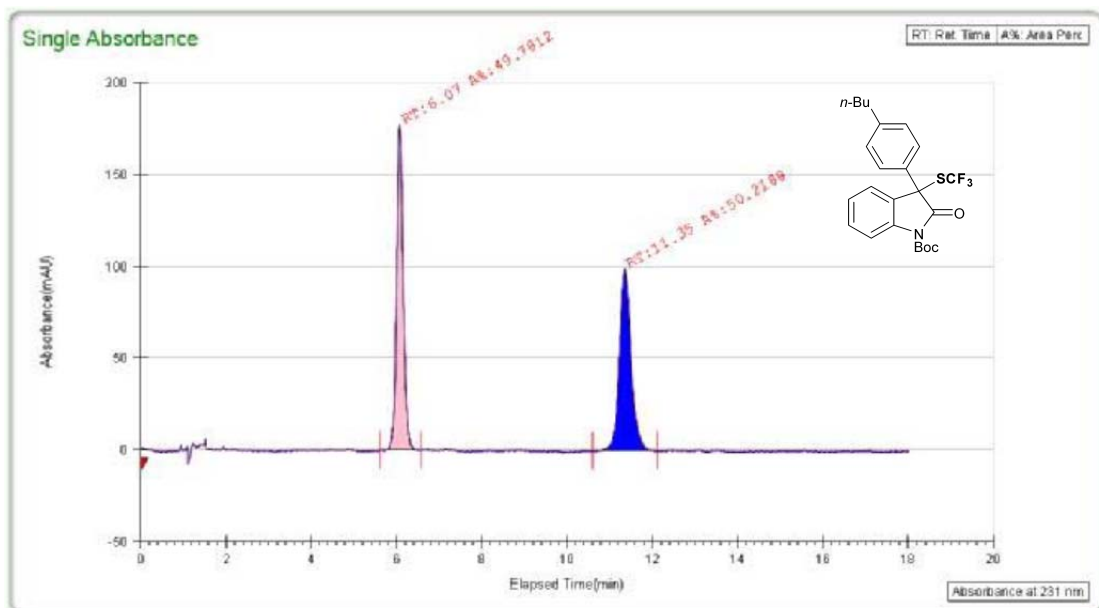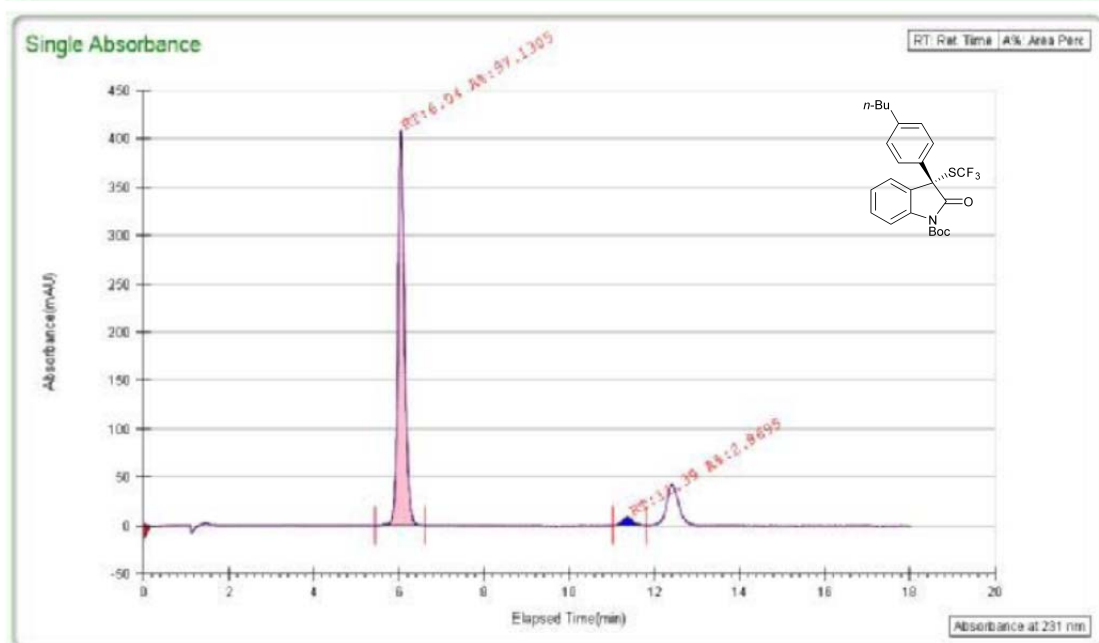

| Peak Number | Area %  | Area      | RT (min) | St. (min) | End (min) |
|-------------|---------|-----------|----------|-----------|-----------|
| 1           | 97.1305 | 4327.0845 | 6.04     | 5.4346    | 6.5995    |
| 2           | 2.8695  | 127.8331  | 11.39    | 11.0184   | 11.8102   |



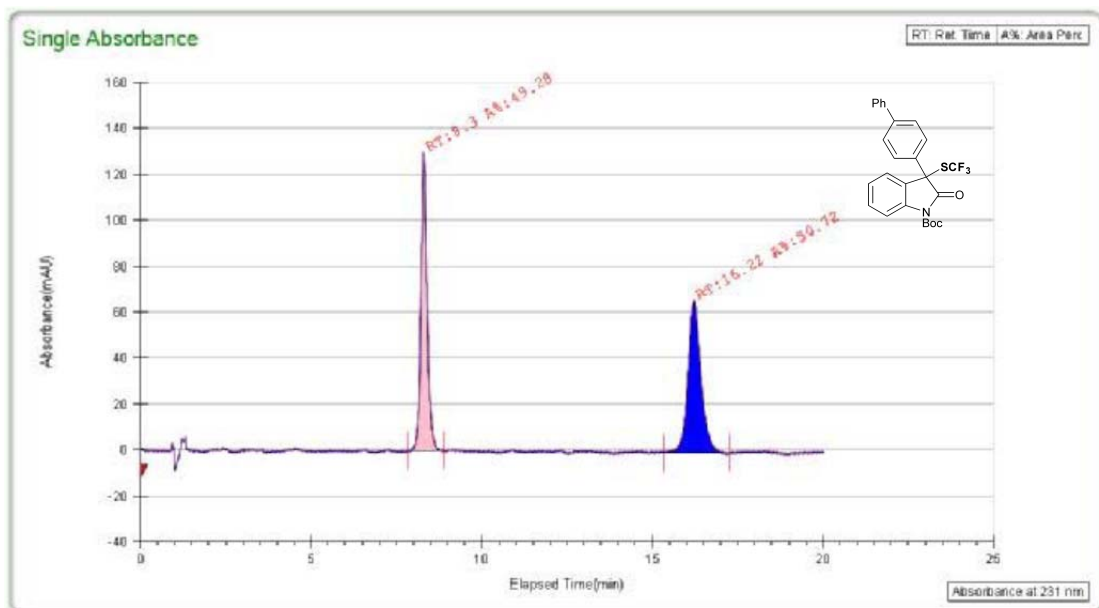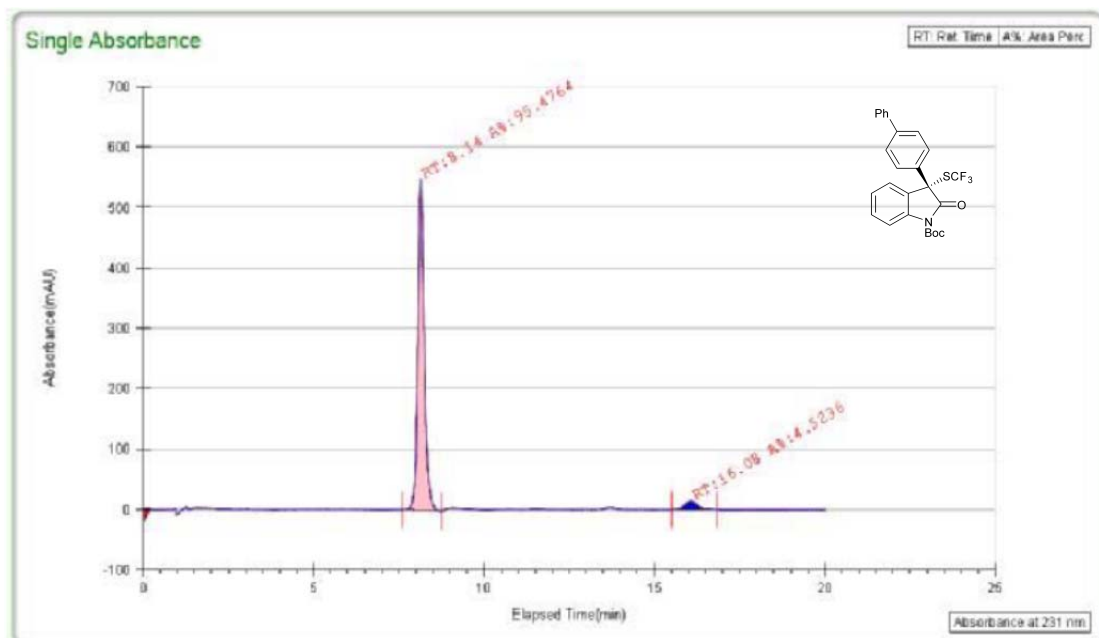

| Peak Number | Area %  | Area      | RT (min) | St. (min) | End (min) |
|-------------|---------|-----------|----------|-----------|-----------|
| 1           | 95.4764 | 7319.7238 | 8.14     | 7.5994    | 8.7462    |
| 2           | 4.5236  | 346.804   | 16.00    | 15.5093   | 16.8413   |

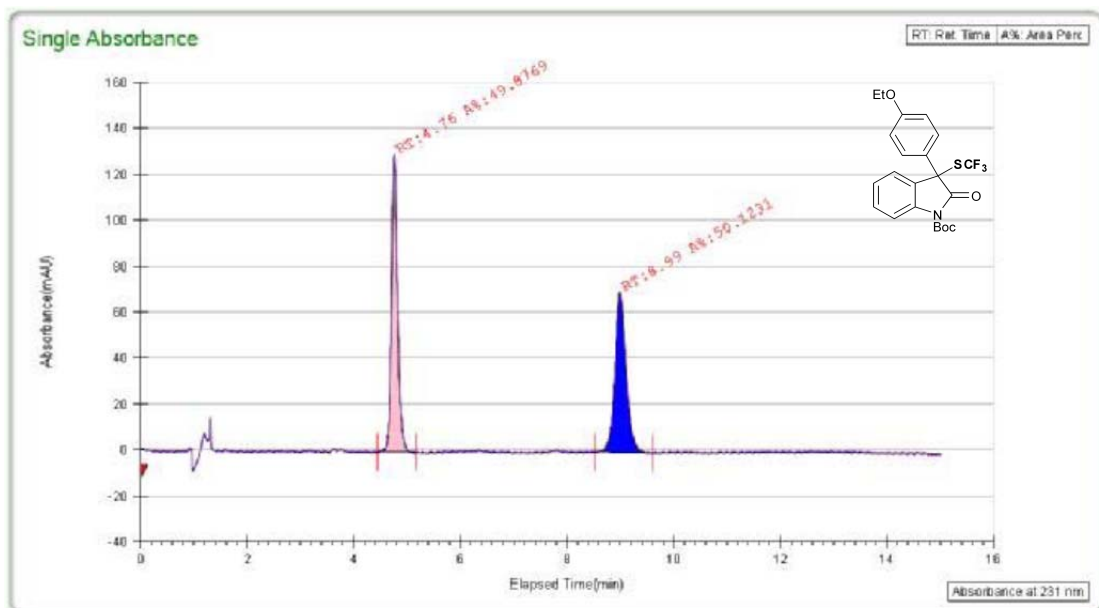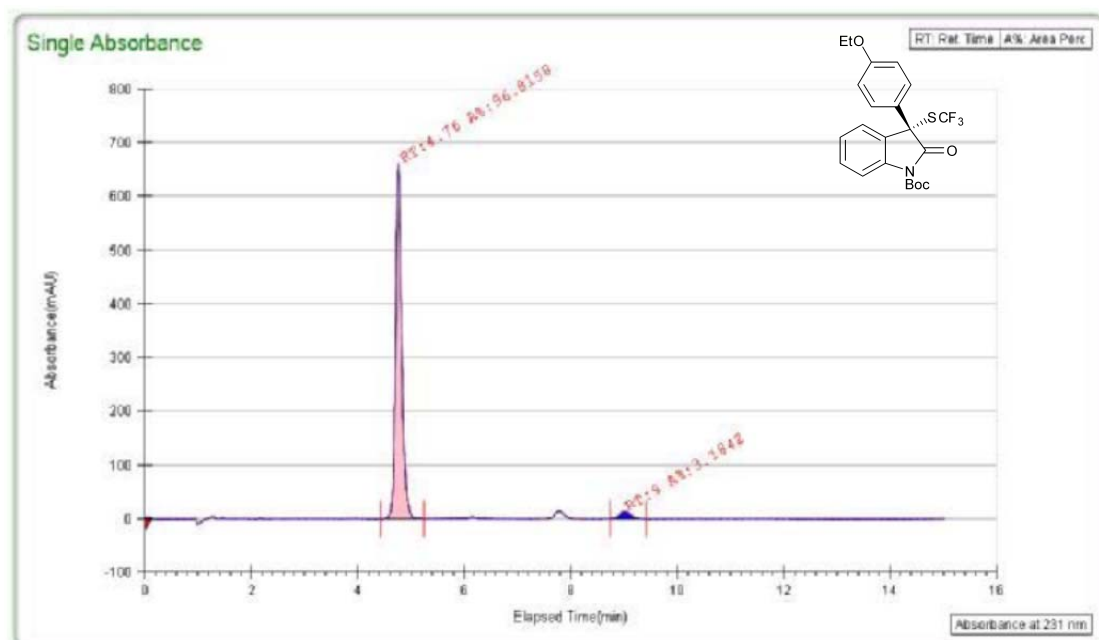

| Peak Number | Area %  | Area      | RT (min) | St. (min) | End (min) |
|-------------|---------|-----------|----------|-----------|-----------|
| 1           | 96.8158 | 5214.6745 | 4.76     | 4.428     | 5.2396    |
| 2           | 3.1842  | 171.5056  | 9        | 8.7346    | 9.4081    |

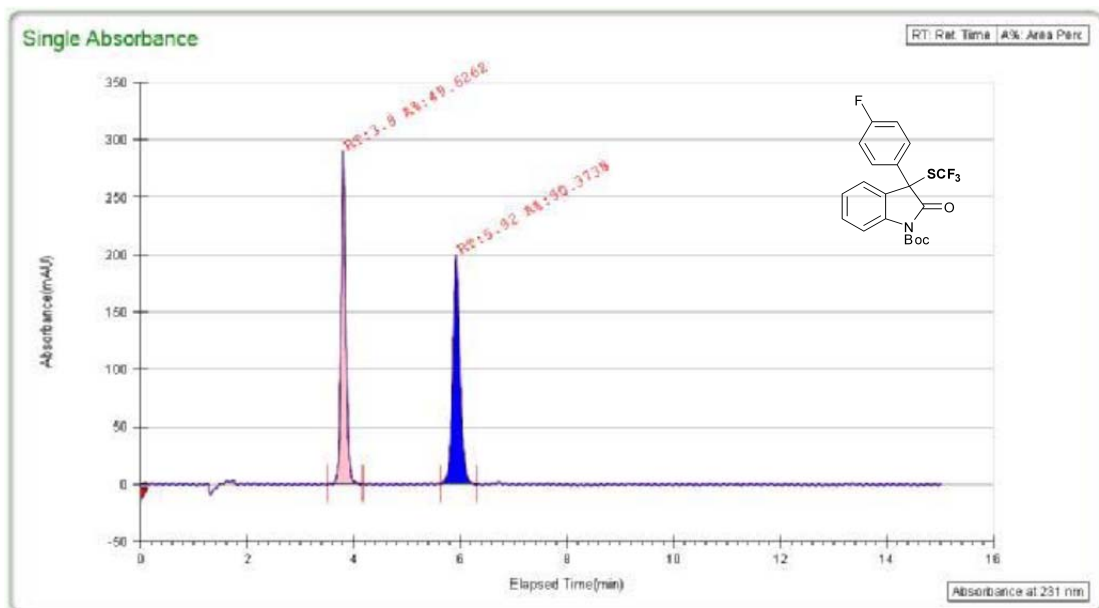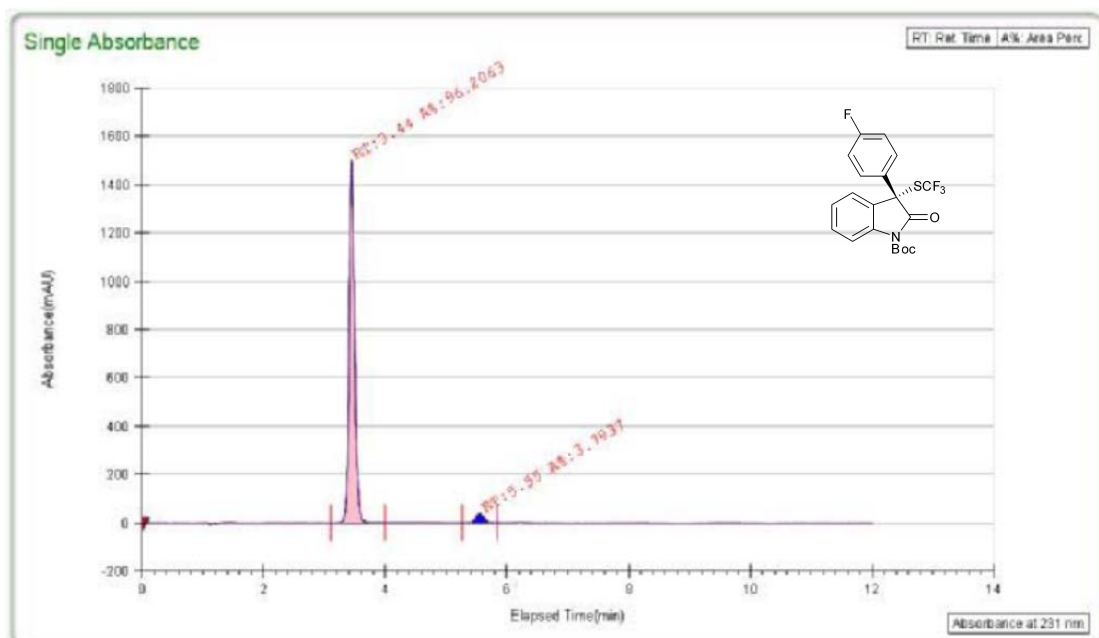

| Peak Number | Area %  | Area      | RT (min) | St. (min) | End (min) |
|-------------|---------|-----------|----------|-----------|-----------|
| 1           | 96.2063 | 9083.2178 | 3.44     | 3.1098    | 3.9947    |
| 2           | 3.7937  | 358.1768  | 5.55     | 5.2646    | 5.8346    |

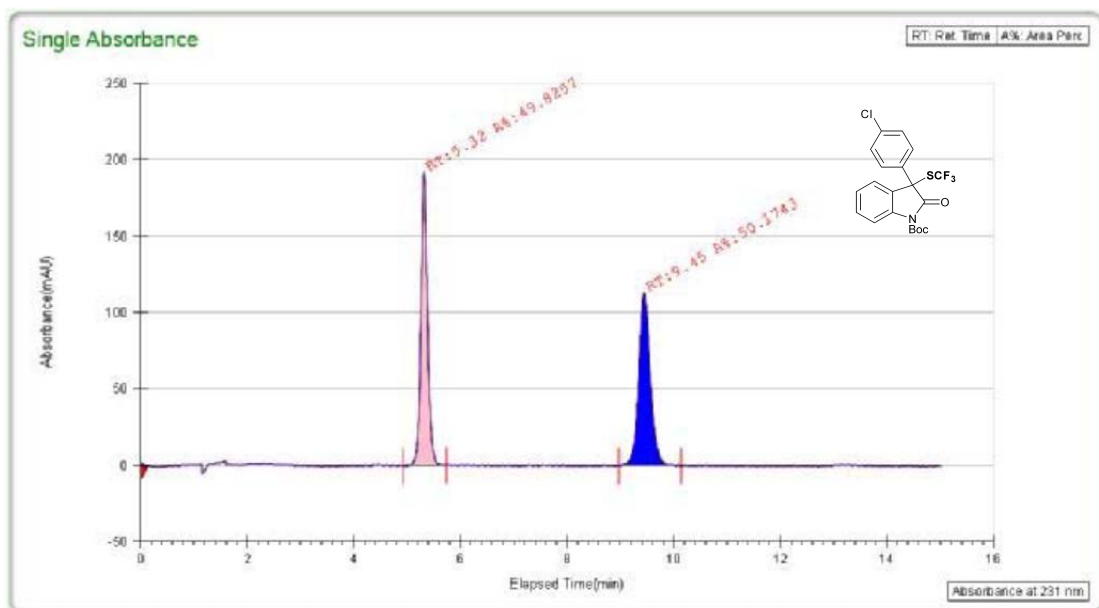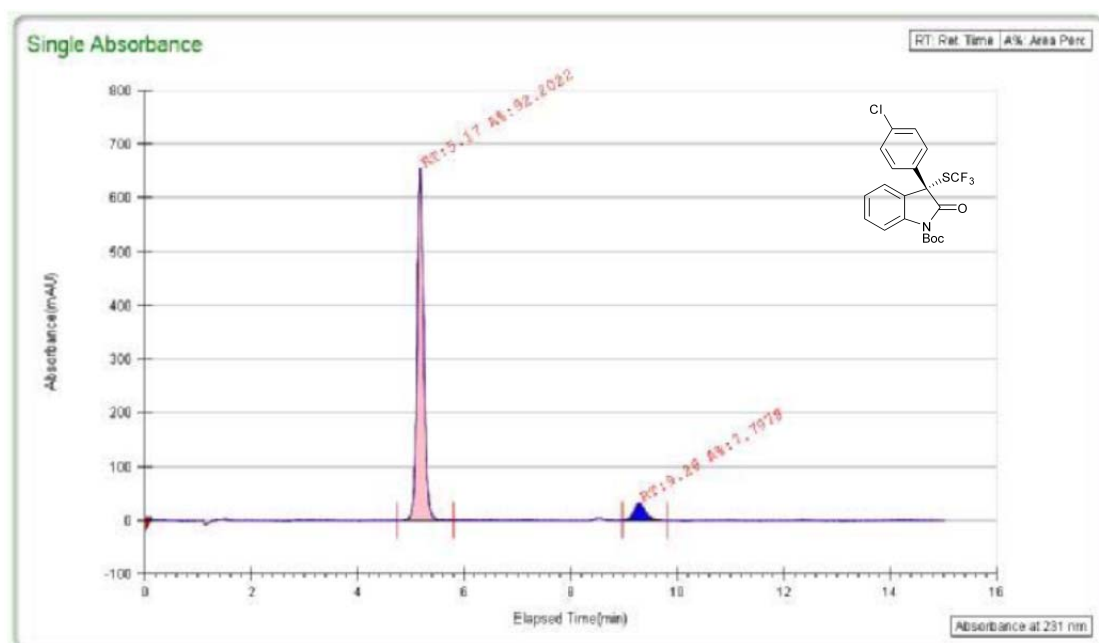

| Peak Number | Area %  | Area      | RT (min) | St. (min) | End (min) |
|-------------|---------|-----------|----------|-----------|-----------|
| 1           | 92.2022 | 5577.1574 | 5.17     | 4.7447    | 5.7962    |
| 2           | 7.7978  | 471.6772  | 9.28     | 8.973     | 9.8048    |

### Chromatogram : XL402Ra\_IA\_991\_flow1\_40999905

Data file: XL402Ra\_IA\_991\_flow1\_40999905.DATA  
Method: HPLC1\_IA\_991\_flow1\_acq\_40  
Date: 2013/8/12 20:43:55

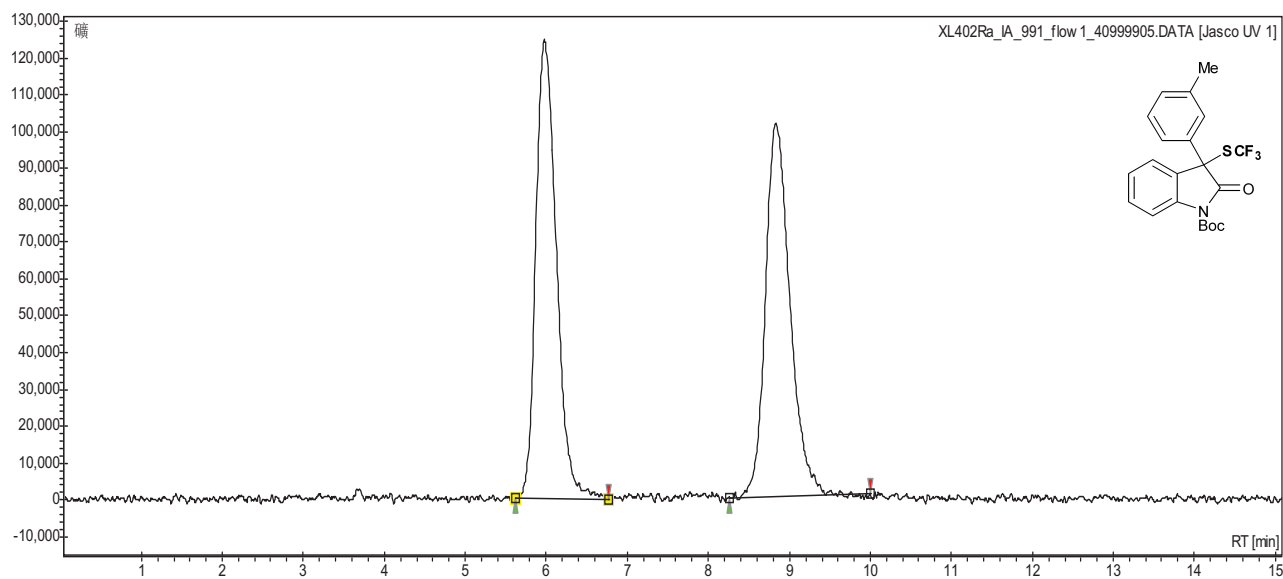

XL402Ra\_IA\_991\_flow1\_40999905.DATA [Jasco UV 1]

| Index | Start [Min] | Time [Min] | End [Min] | Area %  |
|-------|-------------|------------|-----------|---------|
| 1     | 5.620       | 5.975      | 6.777     | 50.911  |
| 2     | 8.264       | 8.842      | 10.000    | 49.089  |
| Total |             |            |           | 100.000 |

### Chromatogram : XL402\_IA\_991\_flow1\_40999906

Data file: XL402\_IA\_991\_flow1\_40999906.DATA  
Method: HPLC1\_IA\_991\_flow1\_acq\_40  
Date: 2013/8/12 21:26:34

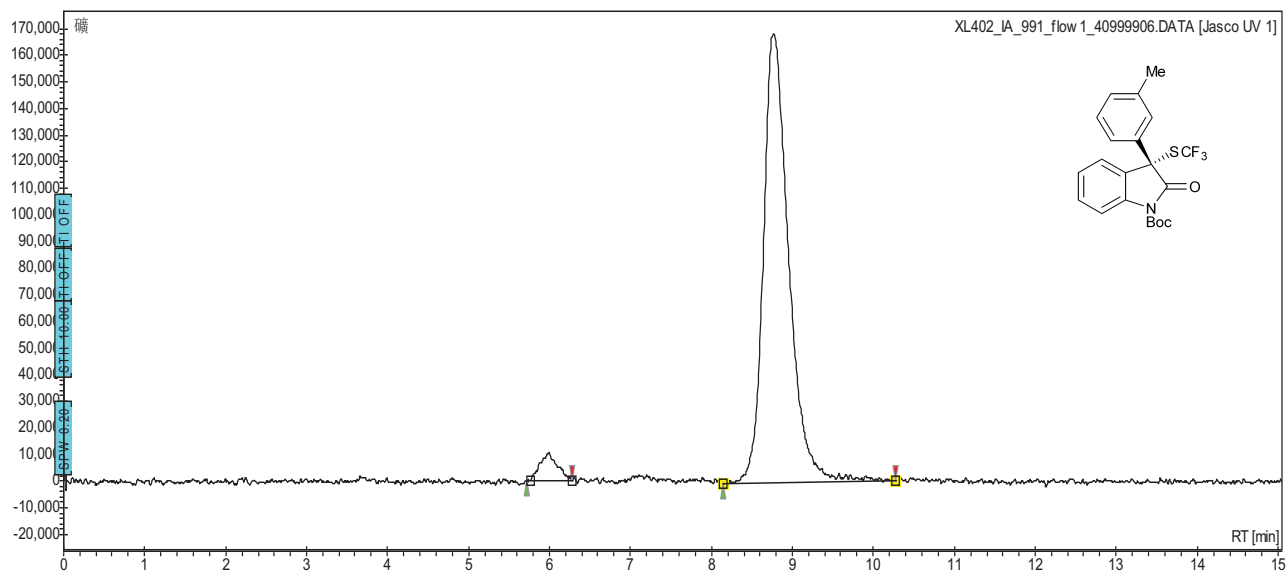

XL402\_IA\_991\_flow1\_40999906.DATA [Jasco UV 1]

| Index | Start [Min] | Time [Min] | End [Min] | Area %  |
|-------|-------------|------------|-----------|---------|
| 2     | 5.724       | 5.992      | 6.278     | 4.031   |
| 1     | 8.140       | 8.767      | 10.279    | 95.969  |
| Total |             |            |           | 100.000 |

### Chromatogram : XL403Ra\_IA\_991\_flow1\_40999907

Data file: XL403Ra\_IA\_991\_flow1\_40999907.DATA  
Method: HPLC1\_IA\_991\_flow1\_acq\_40  
Date: 2013/8/12 22:06:10

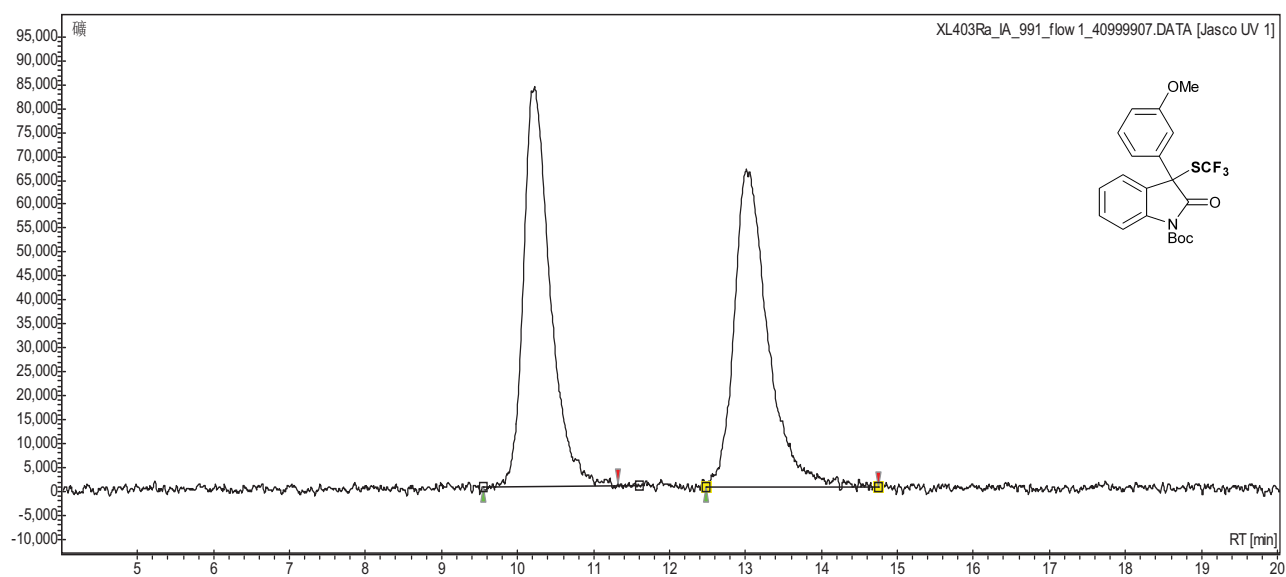

XL403Ra\_IA\_991\_flow1\_40999907.DATA [Jasco UV 1]

| Index | Start [Min] | Time [Min] | End [Min] | Area %  |
|-------|-------------|------------|-----------|---------|
| 1     | 9.545       | 10.225     | 11.322    | 49.933  |
| 2     | 12.479      | 13.008     | 14.752    | 50.067  |
| Total |             |            |           | 100.000 |

### Chromatogram : XL403\_IA\_991\_flow1\_40999908

Data file: XL403\_IA\_991\_flow1\_40999908.DATA  
Method: HPLC1\_IA\_991\_flow1\_acq\_40  
Date: 2013/8/12 22:48:48

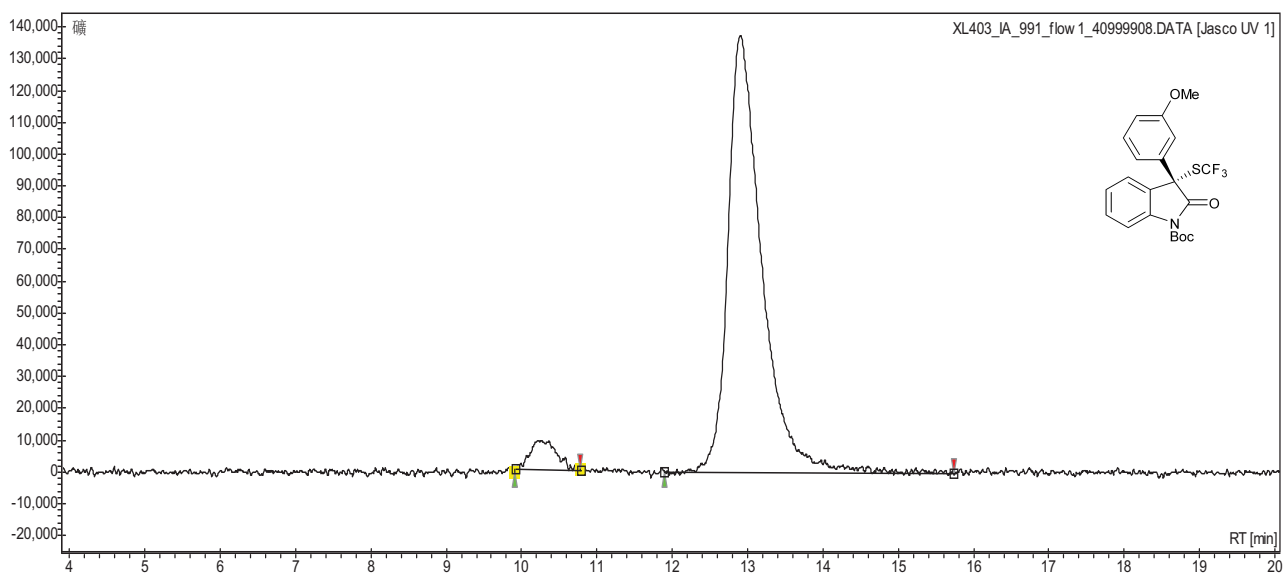

XL403\_IA\_991\_flow1\_40999908.DATA [Jasco UV 1]

| Index | Start [Min] | Time [Min] | End [Min] | Area %  |
|-------|-------------|------------|-----------|---------|
| 2     | 9.917       | 10.258     | 10.772    | 5.069   |
| 1     | 11.902      | 12.900     | 15.734    | 94.931  |
| Total |             |            |           | 100.000 |

### Chromatogram : XL404Ra\_IA\_991\_flow1\_40999909

Data file: XL404Ra\_IA\_991\_flow1\_40999909.DATA  
Method: HPLC1\_IA\_991\_flow1\_acq\_40  
Date: 2013/8/12 23:23:24

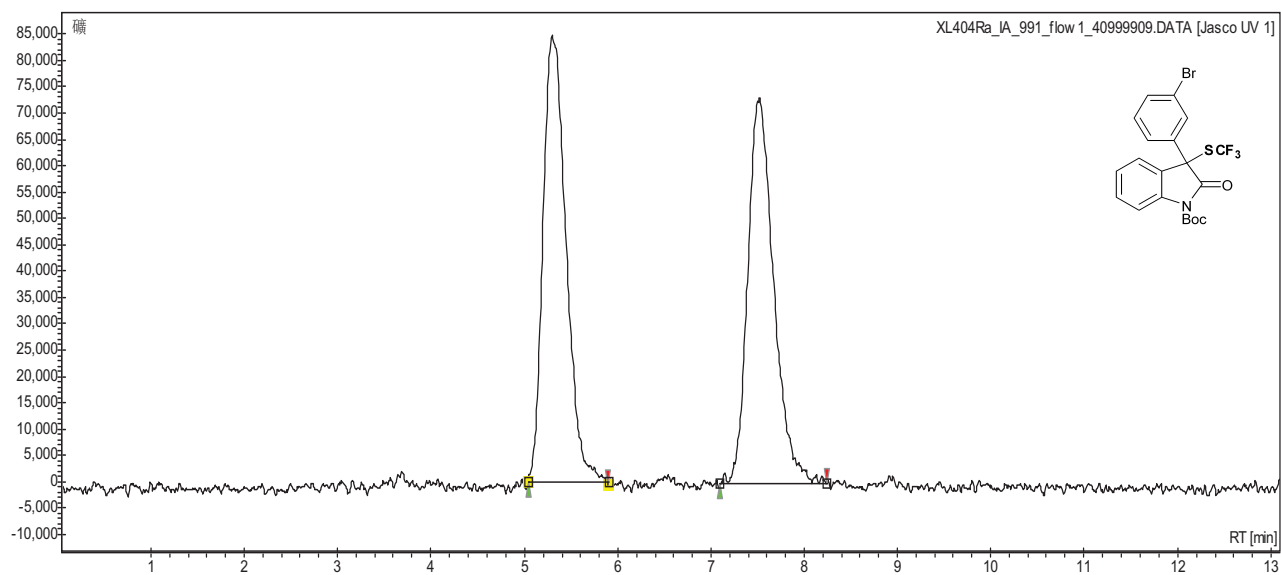

XL404Ra\_IA\_991\_flow1\_40999909.DATA [Jasco UV 1]

| Index | Start [Min] | Time [Min] | End [Min] | Area %  |
|-------|-------------|------------|-----------|---------|
| 1     | 5.043       | 5.300      | 5.895     | 50.506  |
| 2     | 7.102       | 7.517      | 8.237     | 49.494  |
| Total |             |            |           | 100.000 |

### Chromatogram : XL404\_IA\_991\_flow1\_40999910

Data file: XL404\_IA\_991\_flow1\_40999910.DATA  
Method: HPLC1\_IA\_991\_flow1\_acq\_40  
Date: 2013/8/13 0:06:03

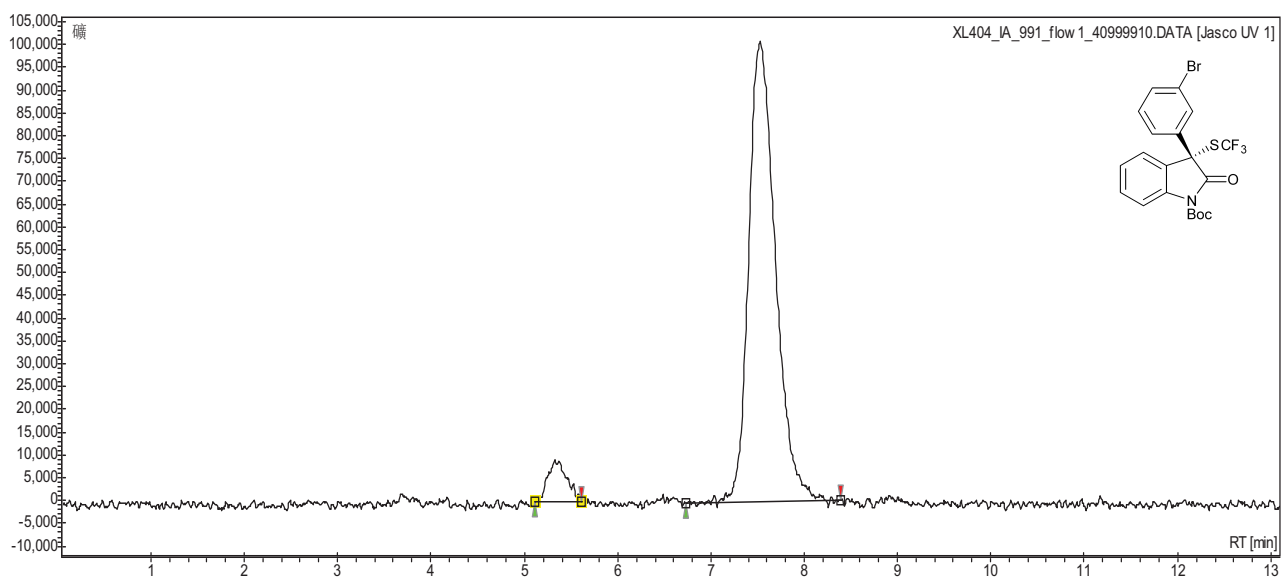

XL404\_IA\_991\_flow1\_40999910.DATA [Jasco UV 1]

| Index | Start [Min] | Time [Min] | End [Min] | Area %  |
|-------|-------------|------------|-----------|---------|
| 2     | 5.120       | 5.375      | 5.615     | 6.182   |
| 1     | 6.735       | 7.525      | 8.394     | 93.818  |
| Total |             |            |           | 100.000 |

### Chromatogram : XL379Ra\_IA\_982\_flow1\_60999902

Data file: XL379Ra\_IA\_982\_flow1\_60999902.DATA  
Method: HPLC1\_IA\_982\_flow1\_acq\_60  
Date: 2013/8/12 18:06:00

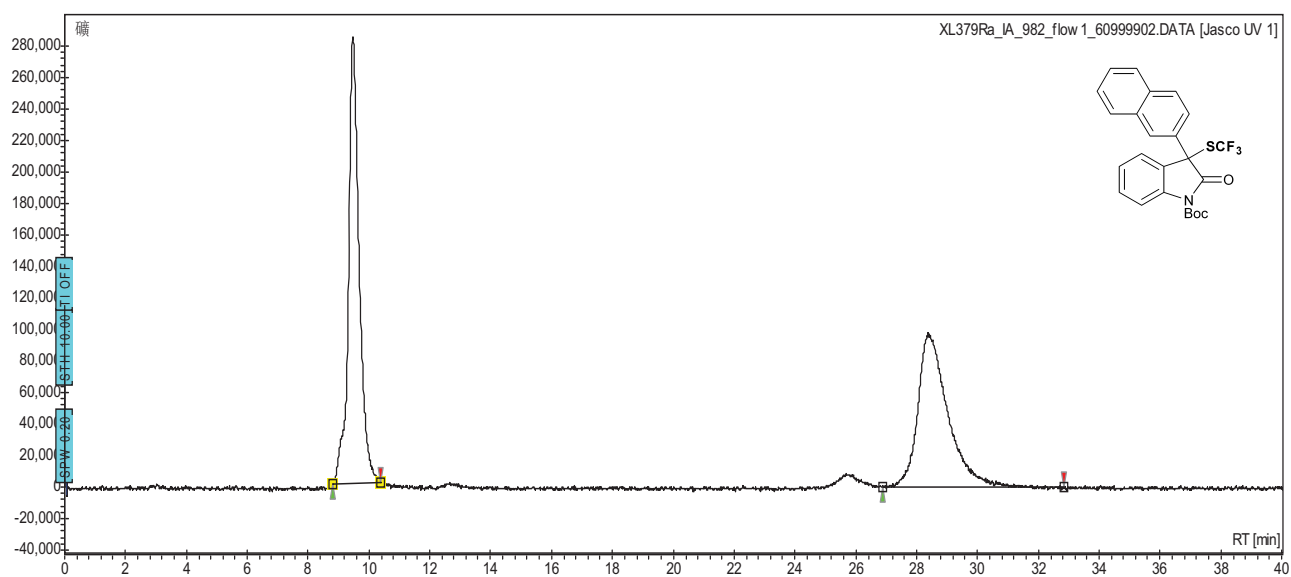

XL379Ra\_IA\_982\_flow1\_60999902.DATA [Jasco UV 1]

| Index | Start [Min] | Time [Min] | End [Min] | Area %  |
|-------|-------------|------------|-----------|---------|
| 1     | 8.831       | 9.467      | 10.403    | 51.479  |
| 2     | 26.901      | 28.375     | 32.851    | 48.521  |
| Total |             |            |           | 100.000 |

### Chromatogram : XL379\_IA\_982\_flow1\_60999903

Data file: XL379\_IA\_982\_flow1\_60999903.DATA  
Method: HPLC1\_IA\_982\_flow1\_acq\_60  
Date: 2013/8/12 19:08:39

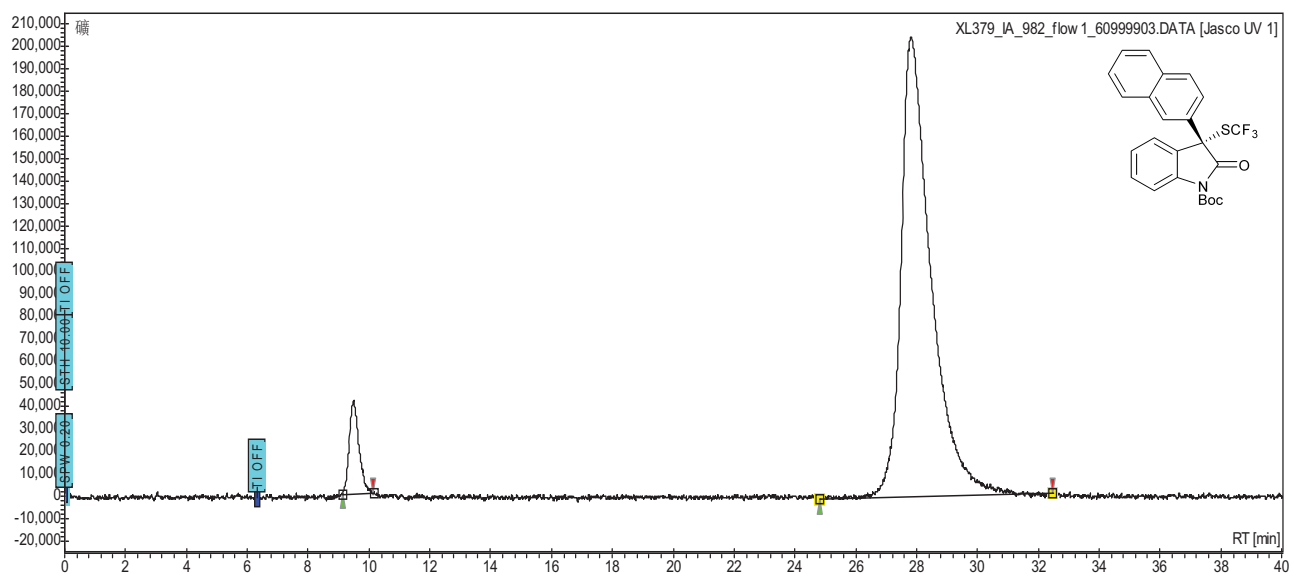

XL379\_IA\_982\_flow1\_60999903.DATA [Jasco UV 1]

| Index | Start [Min] | Time [Min] | End [Min] | Area %  |
|-------|-------------|------------|-----------|---------|
| 1     | 9.153       | 9.492      | 10.150    | 6.198   |
| 2     | 24.819      | 27.817     | 32.479    | 93.802  |
| Total |             |            |           | 100.000 |



### Chromatogram : XL407Ra\_IA\_991\_flow1\_40999911

Data file: XL407Ra\_IA\_991\_flow1\_40999911.DATA  
Method: HPLC1\_IA\_991\_flow1\_acq\_40  
Date: 2013/8/13 0:48:42

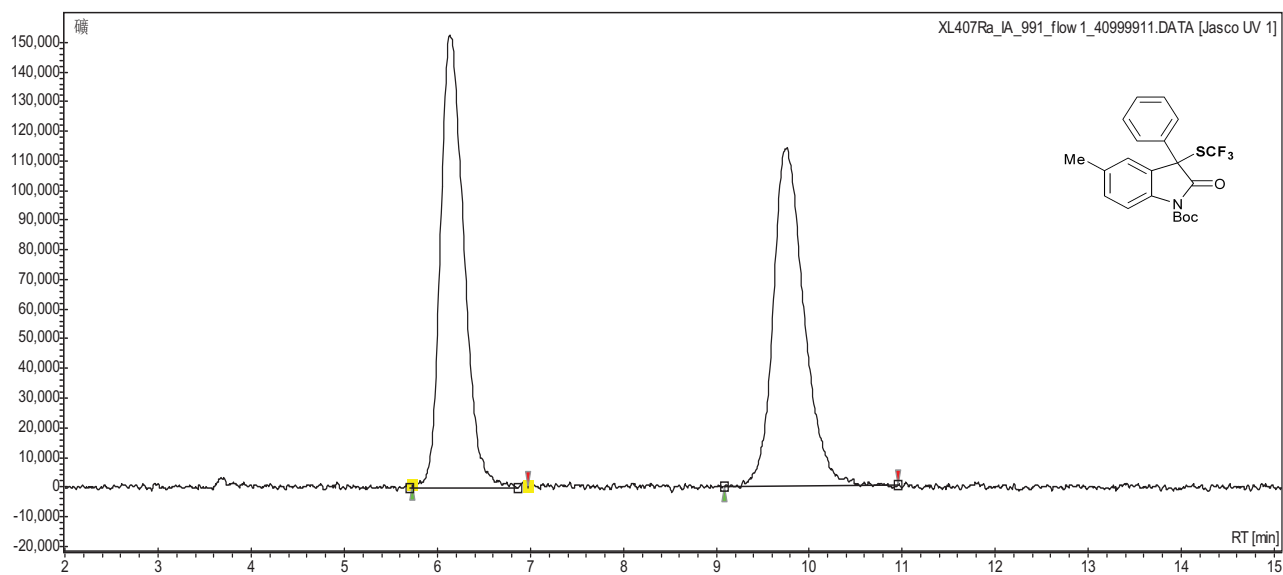

XL407Ra\_IA\_991\_flow1\_40999911.DATA [Jasco UV 1]

| Index | Start [Min] | Time [Min] | End [Min] | Area %  |
|-------|-------------|------------|-----------|---------|
| 1     | 5.731       | 6.133      | 6.983     | 50.708  |
| 2     | 9.091       | 9.758      | 10.950    | 49.292  |
| Total |             |            |           | 100.000 |

### Chromatogram : XL407\_IA\_991\_flow1\_40999912

Data file: XL407\_IA\_991\_flow1\_40999912.DATA  
Method: HPLC1\_IA\_991\_flow1\_acq\_40  
Date: 2013/8/13 1:31:20

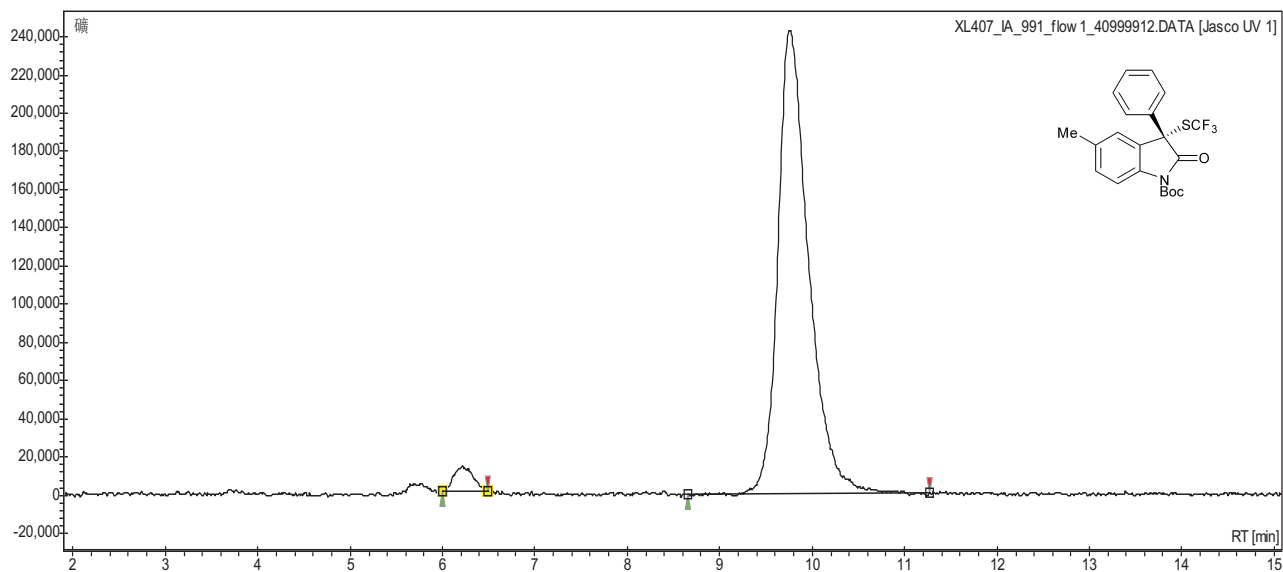

XL407\_IA\_991\_flow1\_40999912.DATA [Jasco UV 1]

| Index | Start [Min] | Time [Min] | End [Min] | Area %  |
|-------|-------------|------------|-----------|---------|
| 2     | 6.005       | 6.208      | 6.486     | 3.166   |
| 1     | 8.657       | 9.758      | 11.268    | 96.834  |
| Total |             |            |           | 100.000 |

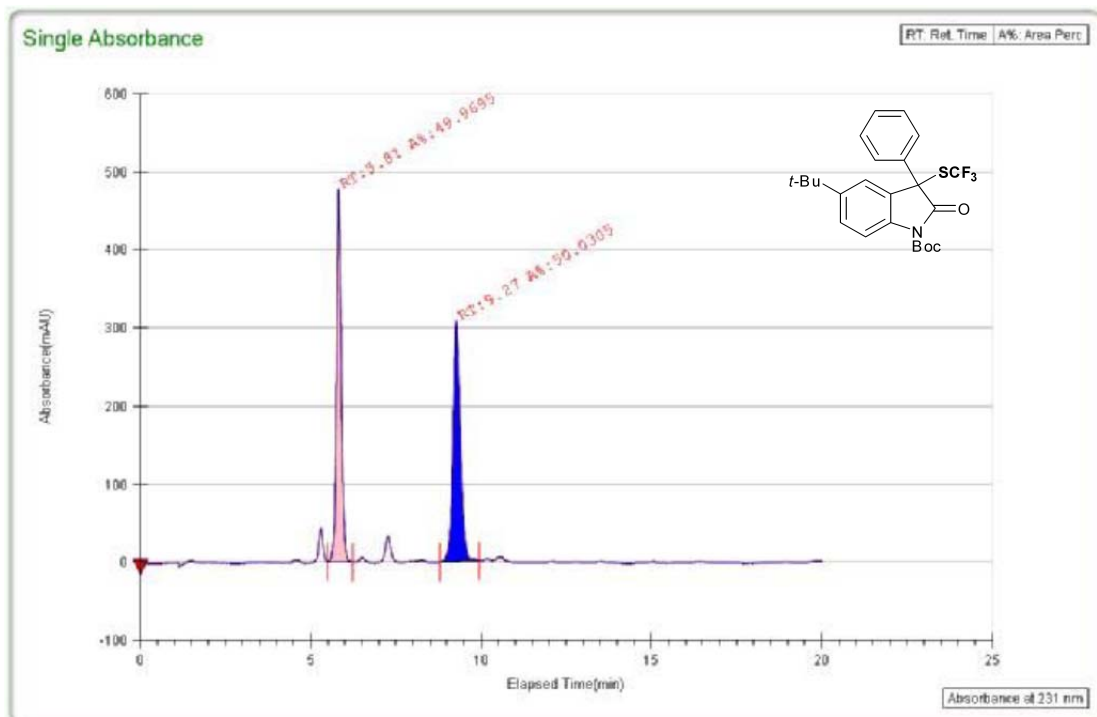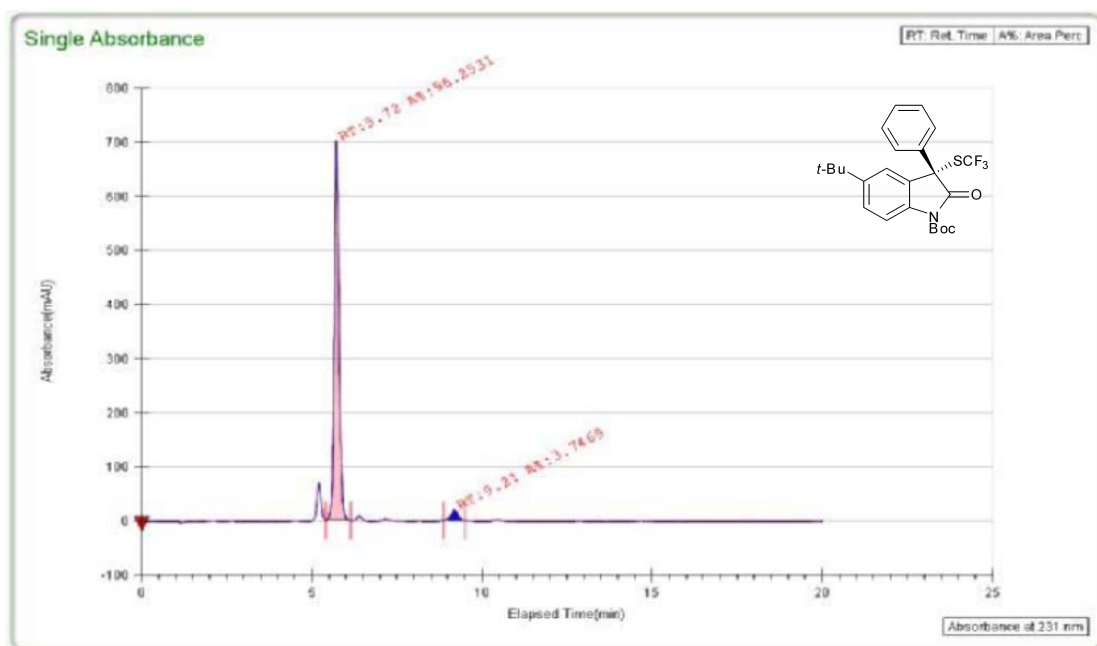

| Peak Number | Area %  | Area      | RT (min) | St. (min) | End (min) |
|-------------|---------|-----------|----------|-----------|-----------|
| 1           | 96.2531 | 6623.7255 | 5.72     | 5.3979    | 6.1512    |
| 2           | 3.7469  | 257.8481  | 9.21     | 8.8713    | 9.5064    |

### Chromatogram : XL423Ra\_IA\_991\_flow1\_4099917

Data file: XL423Ra\_IA\_991\_flow1\_4099917.DATA  
Method: HPLC1\_IA\_991\_flow1\_acq\_40  
Date: 2013/8/13 5:04:28

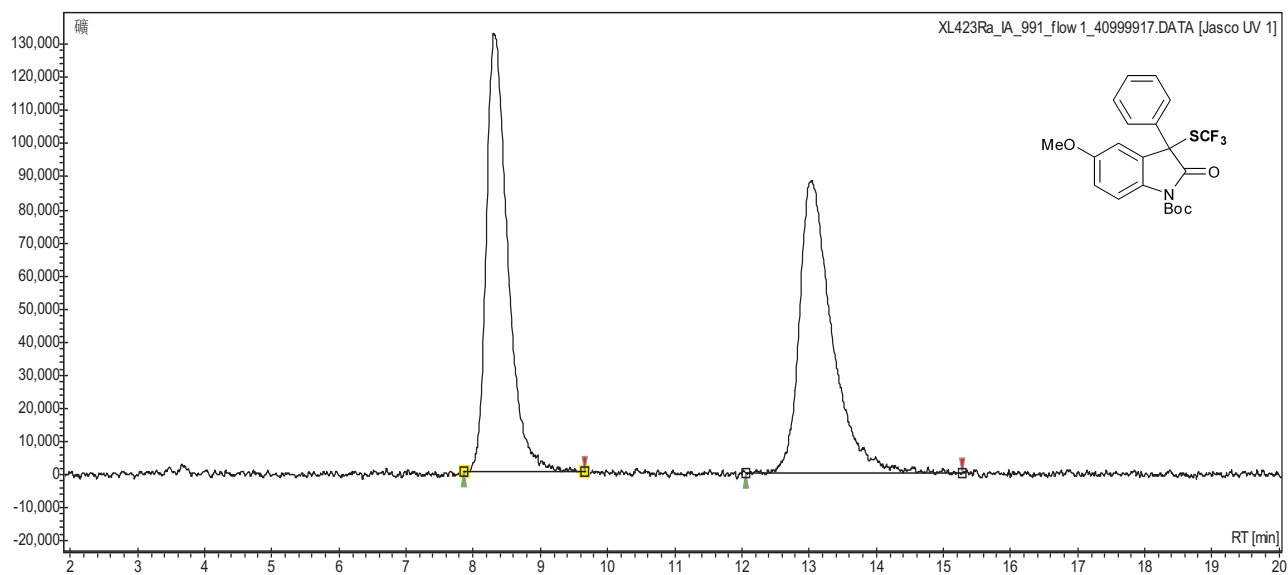

XL423Ra\_IA\_991\_flow1\_4099917.DATA [Jasco UV 1]

| Index | Start Time [Min] | End Time [Min] | Area %  |
|-------|------------------|----------------|---------|
| 1     | 7.863            | 8.308          | 49.539  |
| 2     | 12.066           | 13.042         | 50.461  |
| Total |                  |                | 100.000 |

### Chromatogram : XL423\_IA\_991\_flow1\_4075304

Data file: XL423\_IA\_991\_flow1\_4075304.DATA  
Method: HPLC1\_IA\_991\_flow1\_acq\_40  
Date: 2013/8/15 21:49:15

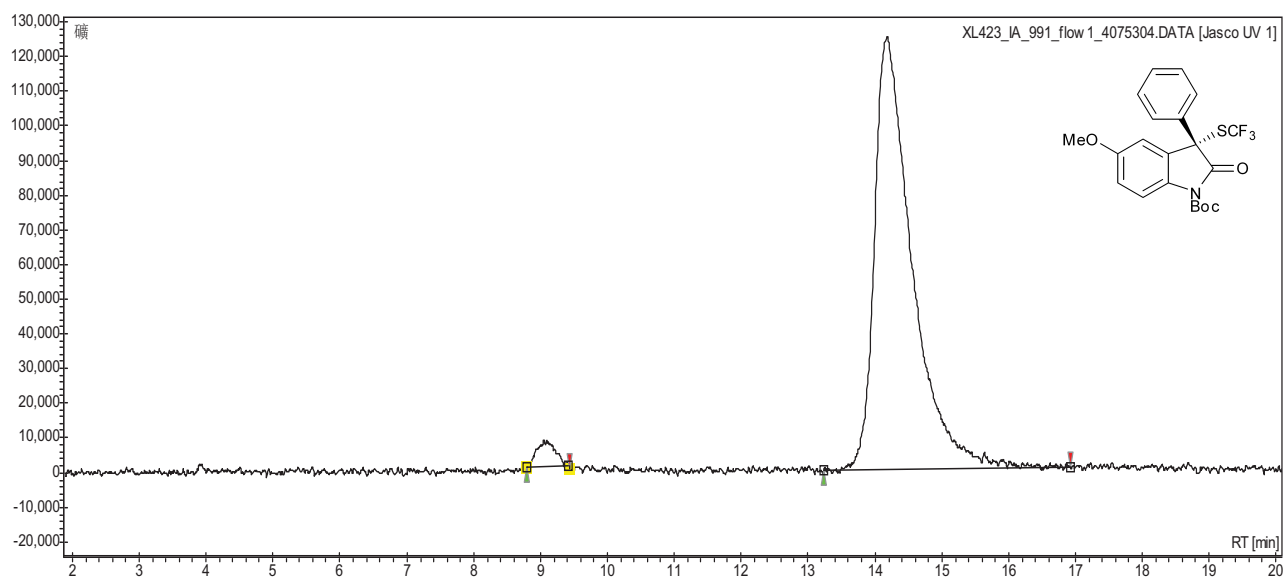

XL423\_IA\_991\_flow1\_4075304.DATA [Jasco UV 1]

| Index | Start Time [Min] | End Time [Min] | Area %  |
|-------|------------------|----------------|---------|
| 1     | 8.793            | 9.092          | 2.937   |
| 2     | 13.238           | 14.183         | 97.063  |
| Total |                  |                | 100.000 |

### Chromatogram : XL406Ra\_IA\_991\_flow1\_4074102

Data file: XL406Ra\_IA\_991\_flow1\_4074102.DATA  
Method: HPLC1\_IA\_991\_flow1\_acq\_40  
Date: 2013/8/14 10:04:16

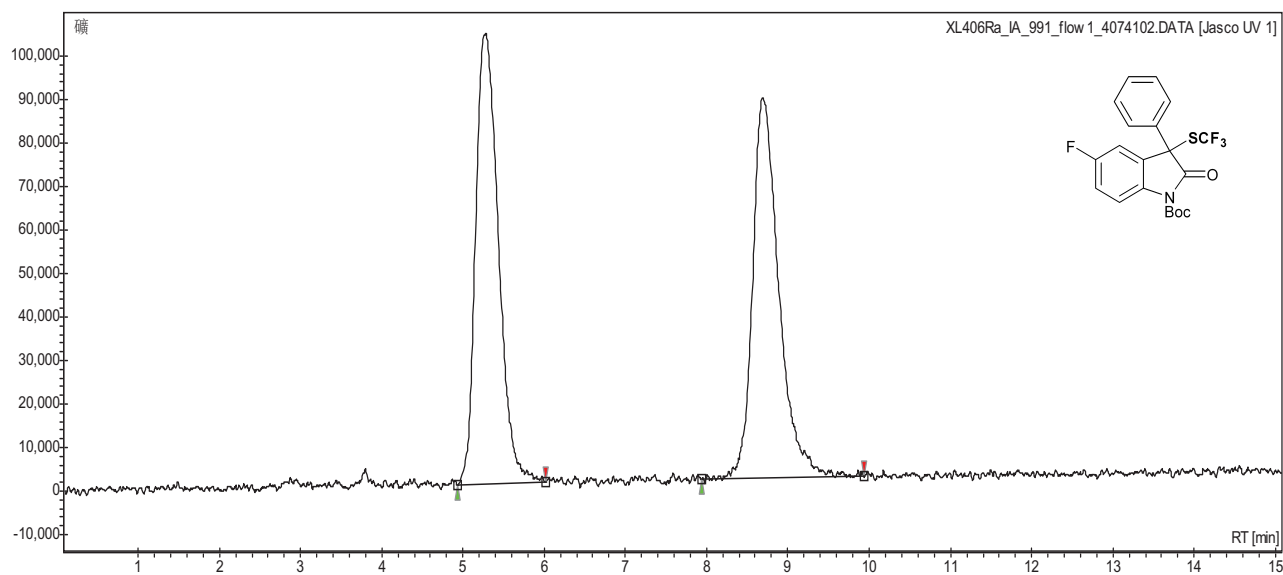

XL406Ra\_IA\_991\_flow1\_4074102.DATA [Jasco UV 1]

| Index | Start [Min] | Time [Min] | End [Min] | Area %  |
|-------|-------------|------------|-----------|---------|
| 1     | 4.927       | 5.267      | 6.019     | 50.600  |
| 2     | 7.932       | 8.692      | 9.932     | 49.400  |
| Total |             |            |           | 100.000 |

### Chromatogram : XL432\_IA\_991\_flow1\_40157003

Data file: XL432\_IA\_991\_flow1\_40157003.DATA  
Method: HPLC1\_IA\_991\_flow1\_acq\_40  
Date: 2013/8/18 23:06:55

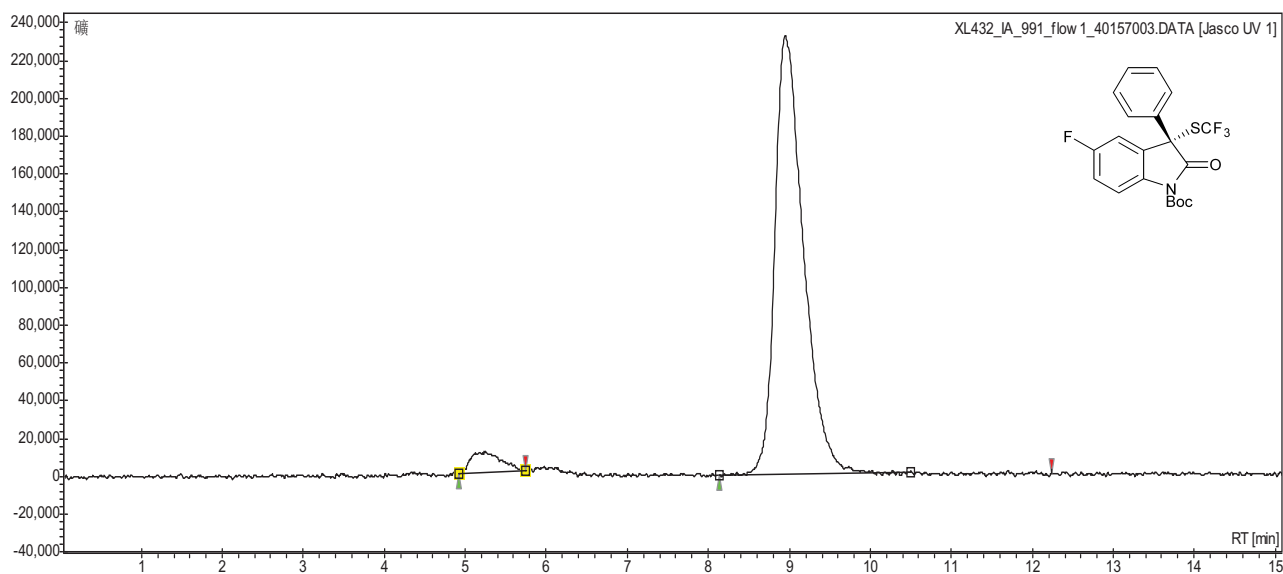

XL432\_IA\_991\_flow1\_40157003.DATA [Jasco UV 1]

| Index | Start [Min] | Time [Min] | End [Min] | Area %  |
|-------|-------------|------------|-----------|---------|
| 2     | 4.914       | 5.225      | 5.750     | 5.119   |
| 1     | 8.140       | 8.950      | 12.231    | 94.881  |
| Total |             |            |           | 100.000 |

### Chromatogram : XL421Rac\_IA\_991\_flow1\_4015908

Data file: XL421Rac\_IA\_991\_flow1\_4015908.DATA  
Method: HPLC1\_IA\_991\_flow1\_acq\_40  
Date: 2013/8/15 1:04:20

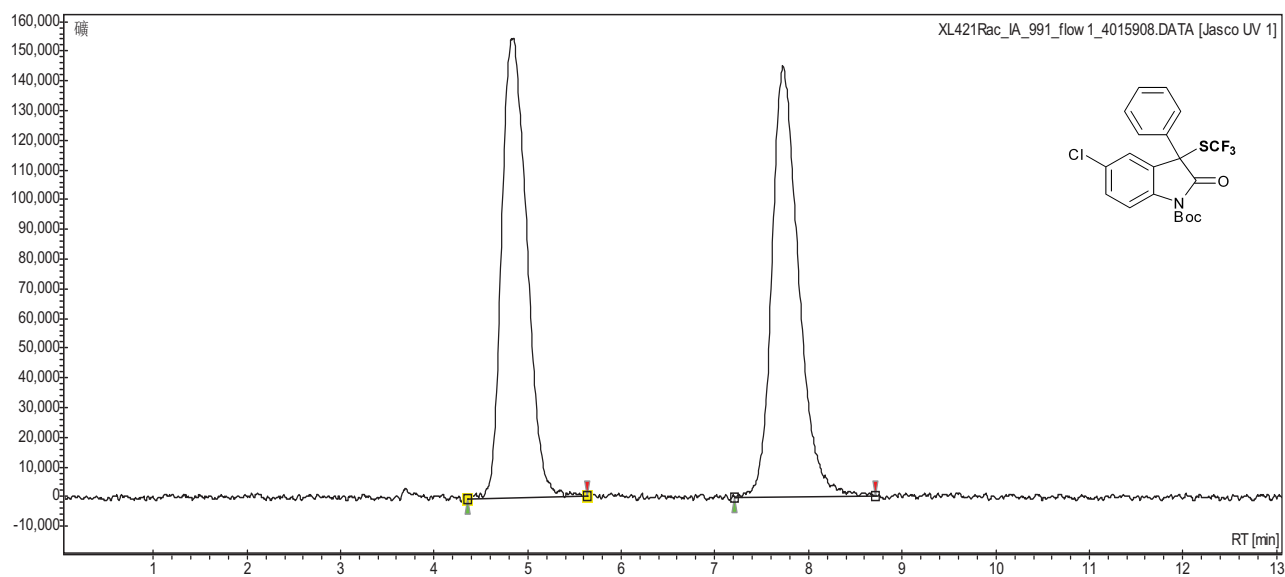

XL421Rac\_IA\_991\_flow1\_4015908.DATA [Jasco UV 1]

| Index | Start [Min] | Time [Min] | End [Min] | Area %  |
|-------|-------------|------------|-----------|---------|
| 1     | 4.362       | 4.842      | 5.633     | 50.202  |
| 2     | 7.215       | 7.725      | 8.721     | 49.798  |
| Total |             |            |           | 100.000 |

### Chromatogram : XL421\_o degree\_IA\_991\_flow1\_40157002

Data file: XL421\_o degree\_IA\_991\_flow1\_40157002.DATA  
Method: HPLC1\_IA\_991\_flow1\_acq\_40  
Date: 2013/8/18 22:24:16

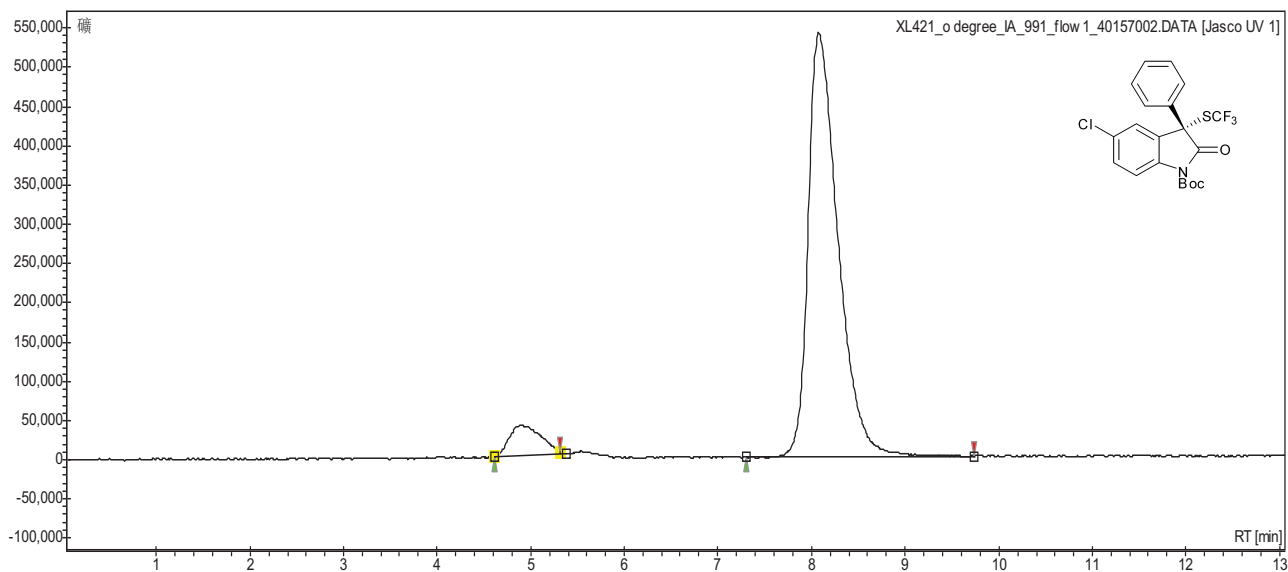

XL421\_o degree\_IA\_991\_flow1\_40157002.DATA [Jasco UV 1]

| Index | Start [Min] | Time [Min] | End [Min] | Area %  |
|-------|-------------|------------|-----------|---------|
| 2     | 4.614       | 4.900      | 5.319     | 6.947   |
| 1     | 7.298       | 8.075      | 9.736     | 93.053  |
| Total |             |            |           | 100.000 |

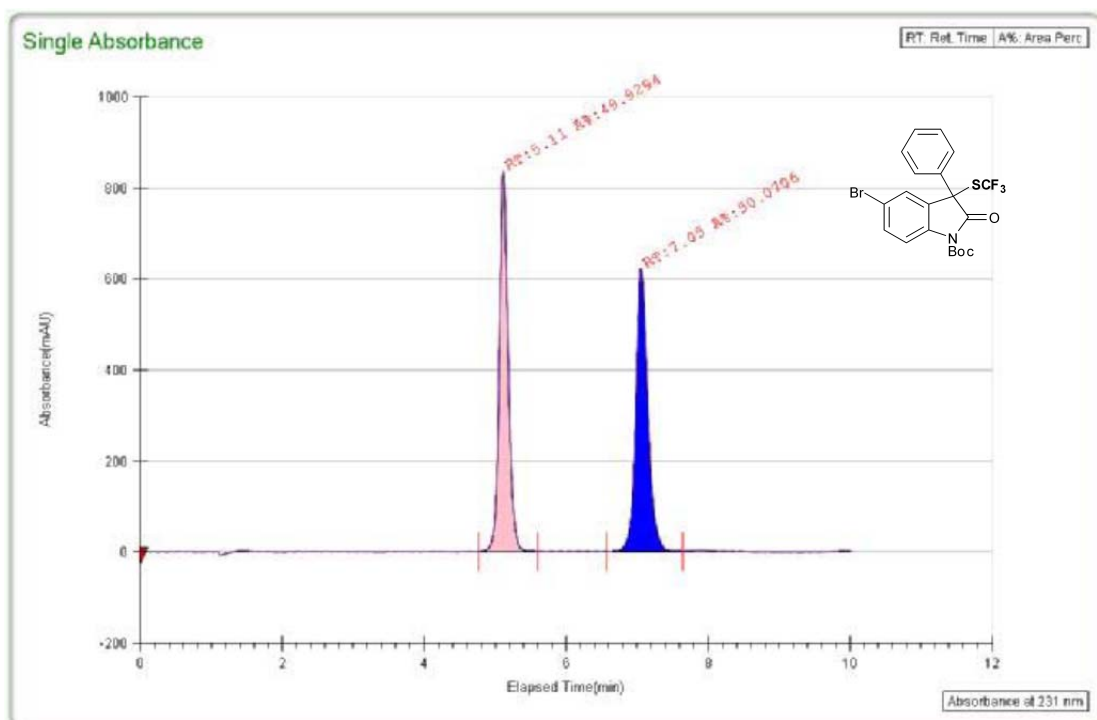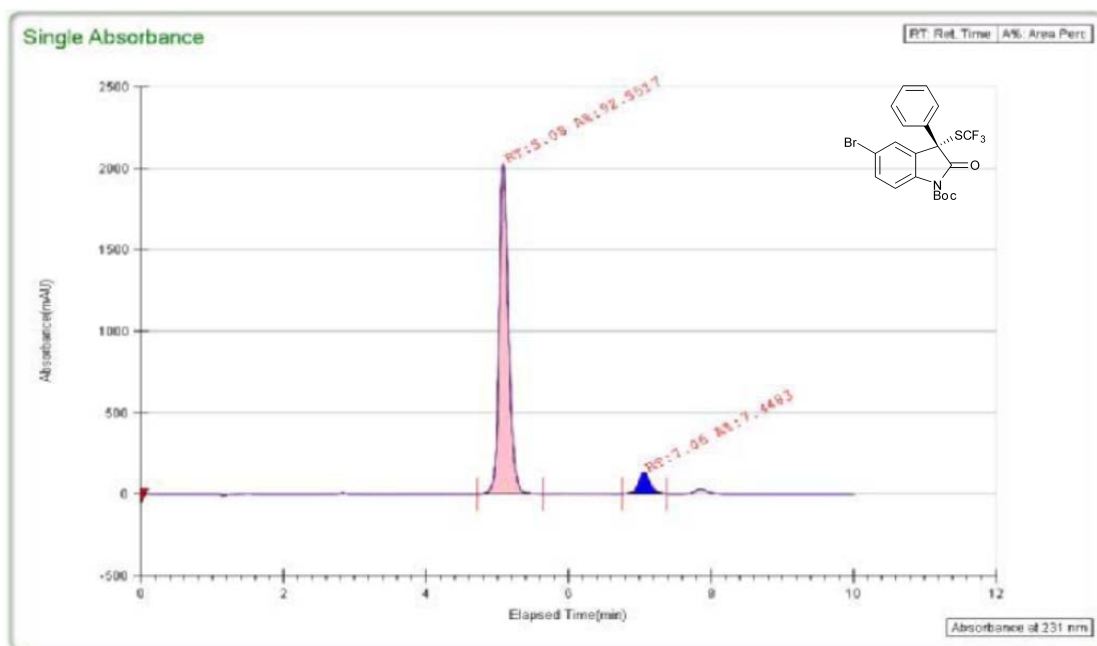

| Peak Number | Area %  | Area       | RT (min) | St. (min) | End (min) |
|-------------|---------|------------|----------|-----------|-----------|
| 1           | 92.5517 | 18419.7121 | 5.08     | 4.7133    | 5.6465    |
| 2           | 7.4483  | 1482.3594  | 7.06     | 6.7514    | 7.3781    |
